# Supplementary material
Source: PubMed Central journal article supplement (PMC4501432)
Supplement: NIHMS63419-supplement-Supp_Info.pdf [file NIHMS63419-supplement-Supp_Info.pdf]

**SI Table 1: Chromatin-associated proteins identified by SILAC-Proteomics**

| Protein name | Average fold change in chromatin abundance (SILAC ratio UV vs no UV) | Forward L(no UV) / H(UV) | Reverse L(UV) / H(no UV) | Forward Significance B (p ≤0.05) | Reverse Significance B (p ≤0.05) |
|--------------|----------------------------------------------------------------------|--------------------------|--------------------------|----------------------------------|----------------------------------|
| PCNA         | 1.883                                                                | 1.852                    | 0.522                    | +                                | +                                |
| PDIA3        | 1.589                                                                | 0.998                    | 0.459                    |                                  | +                                |
| CRYAB        | 1.505                                                                | 1.441                    | 0.637                    | +                                | +                                |
| CISD1        | 1.462                                                                | 1.957                    | 1.034                    | +                                |                                  |
| CLPP         | 1.460                                                                | 1.700                    | 0.820                    | +                                | +                                |
| HGSNAT       | 1.297                                                                | 2.045                    | 1.821                    | +                                | +                                |
| PGM3         | 1.285                                                                | 1.304                    | 0.790                    | +                                | +                                |
| HSPB1        | 1.261                                                                | 1.185                    | 0.747                    | +                                | +                                |
| PRSS3        | 1.240                                                                | 0.265                    | 0.452                    | +                                | +                                |
| SUCLG1       | 1.238                                                                | 1.277                    | 0.834                    |                                  |                                  |
| FUS          | 1.232                                                                | 1.010                    | 0.687                    |                                  | +                                |
| TMUB1        | 1.229                                                                | 0.879                    | 0.633                    |                                  | +                                |
| COL6A3       | 1.225                                                                | 1.369                    | 0.925                    | +                                |                                  |
| LEPREL2      | 1.203                                                                | 0.901                    | 0.664                    |                                  | +                                |
| COL6A2       | 1.190                                                                | 1.363                    | 0.983                    | +                                |                                  |
| COPZ1        | 1.184                                                                | 1.238                    | 0.885                    |                                  |                                  |
| APOO         | 1.181                                                                | 1.182                    | 0.848                    |                                  |                                  |
| PTGES2       | 1.180                                                                | 1.270                    | 0.917                    |                                  |                                  |
| HMG2;HMG3    | 1.172                                                                | 0.629                    | 0.583                    | +                                | +                                |
| ZC3HAV1      | 1.170                                                                | 1.385                    | 1.047                    | +                                |                                  |
| MRPS17       | 1.166                                                                | 1.029                    | 0.767                    |                                  | +                                |
| CUTA         | 1.162                                                                | 1.244                    | 0.925                    |                                  |                                  |
| COL6A1       | 1.162                                                                | 1.293                    | 0.971                    | +                                |                                  |
| HIST1H1E     | 1.160                                                                | 0.639                    | 0.595                    | +                                | +                                |
| DERL2        | 1.157                                                                | 0.603                    | 0.584                    | +                                | +                                |
| LRRC47       | 1.156                                                                | 0.912                    | 0.715                    |                                  | +                                |
| SSB          | 1.153                                                                | 1.197                    | 0.901                    | +                                |                                  |
| EIF2S1       | 1.147                                                                | 1.165                    | 0.885                    |                                  |                                  |
| DDB1         | 1.144                                                                | 1.279                    | 0.991                    | +                                |                                  |
| TIMM9        | 1.140                                                                | 1.101                    | 0.849                    |                                  |                                  |
| CTSK         | 1.134                                                                | 1.601                    | 1.498                    | +                                | +                                |
| KDELC2       | 1.133                                                                | 1.153                    | 0.898                    |                                  |                                  |
| EDF1         | 1.131                                                                | 1.180                    | 0.924                    | +                                |                                  |
| OLA1         | 1.131                                                                | 1.261                    | 0.999                    |                                  |                                  |
| NAGK         | 1.130                                                                | 1.140                    | 0.894                    |                                  |                                  |
| CHMP1A       | 1.125                                                                | 1.278                    | 1.030                    | +                                |                                  |
| ACADVL       | 1.124                                                                | 1.196                    | 0.950                    | +                                |                                  |
| TIMM44       | 1.124                                                                | 1.207                    | 0.961                    |                                  |                                  |
| MRPS22       | 1.123                                                                | 1.134                    | 0.899                    |                                  |                                  |
| ATP5L        | 1.123                                                                | 0.983                    | 0.792                    |                                  | +                                |
| HSPG2        | 1.123                                                                | 1.483                    | 1.311                    | +                                | +                                |
| C2orf47      | 1.122                                                                | 1.219                    | 0.976                    |                                  |                                  |
| YBX3         | 1.122                                                                | 0.923                    | 0.757                    |                                  | +                                |
| TIMM10       | 1.121                                                                | 1.087                    | 0.865                    |                                  |                                  |

| Protein name       | Average fold change in chromatin abundance (SILAC ratio UV vs no UV) | Forward L(no UV) / H(UV) | Reverse L(UV) / H(no UV) | Forward Significance B (p ≤0.05) | Reverse Significance B (p ≤0.05) |
|--------------------|----------------------------------------------------------------------|--------------------------|--------------------------|----------------------------------|----------------------------------|
| EMILIN1            | 1.121                                                                | 1.247                    | 1.005                    | +                                |                                  |
| ECH1               | 1.121                                                                | 1.139                    | 0.908                    |                                  |                                  |
| QIL1;C19orf70      | 1.120                                                                | 1.109                    | 0.884                    |                                  |                                  |
| PTCD3              | 1.119                                                                | 0.977                    | 0.793                    |                                  | +                                |
| PGD                | 1.119                                                                | 1.076                    | 0.861                    |                                  |                                  |
| IDH3A              | 1.117                                                                | 0.989                    | 0.803                    |                                  | +                                |
| FKBP10             | 1.116                                                                | 1.020                    | 0.825                    |                                  | +                                |
| PURA               | 1.114                                                                | 0.913                    | 0.760                    |                                  | +                                |
| MRPS7              | 1.112                                                                | 0.944                    | 0.782                    |                                  | +                                |
| MT-ND1             | 1.112                                                                | 0.772                    | 0.689                    |                                  | +                                |
| PDLIM4             | 1.111                                                                | 1.058                    | 0.860                    |                                  | +                                |
| MAPRE1             | 1.110                                                                | 0.971                    | 0.801                    |                                  | +                                |
| YARS               | 1.109                                                                | 0.906                    | 0.762                    |                                  | +                                |
| DLD                | 1.108                                                                | 1.082                    | 0.882                    |                                  |                                  |
| MRPL23             | 1.107                                                                | 0.924                    | 0.776                    |                                  | +                                |
| LRPPRC             | 1.105                                                                | 1.098                    | 0.899                    |                                  |                                  |
| ROCK2              | 1.104                                                                | 0.989                    | 0.821                    |                                  |                                  |
| PMVK               | 1.102                                                                | 1.182                    | 0.978                    |                                  |                                  |
| LETM1              | 1.101                                                                | 1.132                    | 0.934                    | +                                |                                  |
| RPS27L             | 1.100                                                                | 1.255                    | 1.058                    | +                                |                                  |
| DLST               | 1.100                                                                | 0.933                    | 0.789                    |                                  | +                                |
| PNKD               | 1.099                                                                | 1.241                    | 1.044                    |                                  |                                  |
| MRPS28;TPD52       | 1.099                                                                | 1.088                    | 0.902                    |                                  |                                  |
| ALDH18A1           | 1.098                                                                | 1.154                    | 0.960                    |                                  |                                  |
| SDHA               | 1.097                                                                | 1.063                    | 0.884                    |                                  |                                  |
| SRSF7              | 1.096                                                                | 1.051                    | 0.875                    |                                  |                                  |
| PDHA1              | 1.096                                                                | 1.081                    | 0.899                    |                                  |                                  |
| BTF3L4             | 1.096                                                                | 0.842                    | 0.740                    |                                  | +                                |
| SNX1               | 1.096                                                                | 1.170                    | 0.979                    |                                  |                                  |
| MRPS18A            | 1.096                                                                | 0.802                    | 0.720                    |                                  | +                                |
| FECH               | 1.095                                                                | 0.995                    | 0.837                    |                                  |                                  |
| KPNA3              | 1.095                                                                | 1.050                    | 0.878                    |                                  |                                  |
| COPG2              | 1.094                                                                | 1.120                    | 0.935                    |                                  |                                  |
| OGDH               | 1.093                                                                | 0.993                    | 0.837                    |                                  | +                                |
| PCK2               | 1.093                                                                | 0.790                    | 0.716                    | +                                | +                                |
| MRPS34             | 1.093                                                                | 1.002                    | 0.845                    |                                  |                                  |
| MECP2              | 1.093                                                                | 1.002                    | 0.845                    |                                  | +                                |
| PNPLA6             | 1.093                                                                | 1.144                    | 0.960                    |                                  |                                  |
| EXOC8              | 1.091                                                                | 1.231                    | 1.051                    |                                  |                                  |
| HADHA              | 1.090                                                                | 1.038                    | 0.875                    |                                  |                                  |
| MRPL4              | 1.090                                                                | 0.865                    | 0.760                    |                                  | +                                |
| PPFIBP1            | 1.089                                                                | 1.135                    | 0.960                    |                                  |                                  |
| SERPINB1           | 1.088                                                                | 1.170                    | 0.994                    |                                  |                                  |
| POTEE;POTEI;POTEKF | 1.087                                                                | 0.697                    | 0.677                    | +                                | +                                |
| RAC2               | 1.087                                                                | 1.050                    | 0.890                    |                                  |                                  |
| TPM1               | 1.086                                                                | 0.992                    | 0.847                    |                                  |                                  |

| Protein name  | Average fold change in chromatin abundance (SILAC ratio UV vs no UV) | Forward L(no UV) / H(UV) | Reverse L(UV) / H(no UV) | Forward Significance B (p ≤0.05) | Reverse Significance B (p ≤0.05) |
|---------------|----------------------------------------------------------------------|--------------------------|--------------------------|----------------------------------|----------------------------------|
| MT-ATP8       | 1.086                                                                | 0.815                    | 0.736                    |                                  | +                                |
| RAB5A         | 1.086                                                                | 1.017                    | 0.865                    |                                  |                                  |
| ADD1          | 1.085                                                                | 1.089                    | 0.925                    |                                  |                                  |
| SIPA1L1       | 1.085                                                                | 1.421                    | 1.337                    | +                                | +                                |
| CDC42EP2      | 1.084                                                                | 0.931                    | 0.808                    |                                  | +                                |
| MRPS26        | 1.084                                                                | 1.177                    | 1.009                    |                                  |                                  |
| HIST1H1B      | 1.084                                                                | 0.944                    | 0.817                    |                                  | +                                |
| GCN1L1        | 1.084                                                                | 0.973                    | 0.837                    |                                  |                                  |
| RANBP2        | 1.084                                                                | 1.030                    | 0.879                    |                                  |                                  |
| EZR           | 1.083                                                                | 1.147                    | 0.981                    |                                  |                                  |
| PDHB          | 1.083                                                                | 1.076                    | 0.917                    |                                  |                                  |
| SLC25A6       | 1.083                                                                | 1.173                    | 1.008                    |                                  |                                  |
| PGM1          | 1.082                                                                | 1.075                    | 0.917                    |                                  |                                  |
| MRPL24        | 1.082                                                                | 1.035                    | 0.886                    |                                  |                                  |
| MYO1E         | 1.082                                                                | 1.176                    | 1.012                    |                                  |                                  |
| ACAT1         | 1.081                                                                | 1.104                    | 0.945                    |                                  |                                  |
| ACTBL2        | 1.081                                                                | 0.689                    | 0.679                    | +                                | +                                |
| TKT           | 1.081                                                                | 0.856                    | 0.766                    |                                  | +                                |
| MANF          | 1.081                                                                | 0.991                    | 0.854                    |                                  |                                  |
| APC2          | 1.080                                                                | 0.812                    | 0.741                    |                                  | +                                |
| ANKRD13A      | 1.080                                                                | 1.130                    | 0.971                    |                                  |                                  |
| CCDC50        | 1.080                                                                | 1.247                    | 1.096                    | +                                |                                  |
| MTX3          | 1.080                                                                | 1.169                    | 1.009                    |                                  |                                  |
| DLAT          | 1.079                                                                | 0.995                    | 0.860                    |                                  |                                  |
| ITPR3         | 1.079                                                                | 1.238                    | 1.087                    | +                                |                                  |
| CCT4          | 1.079                                                                | 1.081                    | 0.929                    |                                  |                                  |
| CTSL1         | 1.079                                                                | 1.307                    | 1.176                    | +                                |                                  |
| SLC25A5       | 1.079                                                                | 1.073                    | 0.922                    |                                  |                                  |
| CSRP1         | 1.078                                                                | 0.690                    | 0.682                    | +                                | +                                |
| TAGLN         | 1.078                                                                | 0.944                    | 0.826                    |                                  | +                                |
| ATP5H         | 1.077                                                                | 1.000                    | 0.866                    |                                  | +                                |
| PPP2CB;PPP2CA | 1.077                                                                | 1.171                    | 1.017                    |                                  |                                  |
| NARS          | 1.076                                                                | 0.976                    | 0.849                    |                                  |                                  |
| NDUFA10       | 1.076                                                                | 1.167                    | 1.015                    | +                                |                                  |
| DPP3          | 1.076                                                                | 1.151                    | 0.999                    |                                  |                                  |
| ADD3          | 1.075                                                                | 1.071                    | 0.926                    |                                  |                                  |
| UBE2M         | 1.074                                                                | 1.053                    | 0.914                    |                                  |                                  |
| SCCPDH        | 1.074                                                                | 0.965                    | 0.846                    |                                  |                                  |
| PSAT1         | 1.073                                                                | 0.800                    | 0.743                    |                                  | +                                |
| KIAA1217      | 1.073                                                                | 1.311                    | 1.197                    | +                                |                                  |
| APPL2         | 1.073                                                                | 1.264                    | 1.134                    |                                  |                                  |
| MRPL40        | 1.073                                                                | 0.874                    | 0.786                    |                                  | +                                |
| SPECC1L       | 1.072                                                                | 1.105                    | 0.962                    |                                  |                                  |
| MTHFD1L       | 1.072                                                                | 1.089                    | 0.948                    |                                  |                                  |
| NAA50         | 1.071                                                                | 1.153                    | 1.010                    |                                  |                                  |
| AKR7A2        | 1.071                                                                | 1.151                    | 1.009                    |                                  |                                  |

| Protein name | Average fold change in chromatin abundance (SILAC ratio UV vs no UV) | Forward L(no UV) / H(UV) | Reverse L(UV) / H(no UV) | Forward Significance B (p ≤0.05) | Reverse Significance B (p ≤0.05) |
|--------------|----------------------------------------------------------------------|--------------------------|--------------------------|----------------------------------|----------------------------------|
| MRPS23       | 1.071                                                                | 0.996                    | 0.873                    |                                  |                                  |
| NDUFA4       | 1.070                                                                | 1.081                    | 0.945                    |                                  |                                  |
| ETHE1        | 1.070                                                                | 0.873                    | 0.790                    |                                  | +                                |
| LONP1        | 1.069                                                                | 0.963                    | 0.851                    |                                  |                                  |
| ATP6V1F      | 1.069                                                                | 1.154                    | 1.016                    |                                  |                                  |
| NONO         | 1.069                                                                | 1.116                    | 0.978                    |                                  |                                  |
| AGPS         | 1.069                                                                | 1.092                    | 0.956                    |                                  |                                  |
| ACSL3        | 1.069                                                                | 1.163                    | 1.025                    |                                  |                                  |
| GMPS         | 1.068                                                                | 1.053                    | 0.922                    |                                  |                                  |
| SPATS2L      | 1.068                                                                | 1.009                    | 0.887                    |                                  |                                  |
| PMM2         | 1.068                                                                | 1.103                    | 0.968                    |                                  |                                  |
| RPL30        | 1.068                                                                | 1.168                    | 1.033                    |                                  |                                  |
| MTHFD1       | 1.068                                                                | 0.993                    | 0.875                    |                                  |                                  |
| CCT7         | 1.068                                                                | 0.901                    | 0.810                    |                                  | +                                |
| YBX1         | 1.068                                                                | 0.975                    | 0.862                    |                                  | +                                |
| TPM3         | 1.067                                                                | 0.831                    | 0.767                    |                                  | +                                |
| HINT2        | 1.067                                                                | 0.940                    | 0.837                    |                                  |                                  |
| SMARCA1      | 1.067                                                                | 1.343                    | 1.263                    | +                                | +                                |
| PDXK         | 1.067                                                                | 1.014                    | 0.893                    |                                  |                                  |
| DENR         | 1.067                                                                | 0.961                    | 0.852                    |                                  |                                  |
| CARS         | 1.067                                                                | 0.908                    | 0.816                    |                                  | +                                |
| SCAF11       | 1.066                                                                | 1.140                    | 1.007                    |                                  |                                  |
| LACC1        | 1.066                                                                | 1.413                    | 1.389                    | +                                | +                                |
| SLC25A1      | 1.066                                                                | 1.110                    | 0.978                    |                                  |                                  |
| MTDH         | 1.066                                                                | 1.038                    | 0.914                    |                                  |                                  |
| ALDH1L2      | 1.065                                                                | 0.907                    | 0.818                    |                                  | +                                |
| EXOG         | 1.065                                                                | 1.061                    | 0.936                    |                                  |                                  |
| P4HA1        | 1.065                                                                | 0.946                    | 0.845                    |                                  |                                  |
| SRP72        | 1.064                                                                | 1.130                    | 1.001                    |                                  |                                  |
| RPS15        | 1.064                                                                | 0.883                    | 0.803                    |                                  | +                                |
| NIPSNAP1     | 1.064                                                                | 0.935                    | 0.838                    |                                  |                                  |
| FAM129B      | 1.064                                                                | 1.173                    | 1.047                    | +                                |                                  |
| RANGAP1      | 1.063                                                                | 1.037                    | 0.918                    |                                  |                                  |
| NPC2         | 1.063                                                                | 1.074                    | 0.950                    |                                  |                                  |
| PGRMC2       | 1.063                                                                | 0.906                    | 0.820                    |                                  | +                                |
| RPL26L1      | 1.063                                                                | 0.998                    | 0.886                    |                                  |                                  |
| TXNDC17      | 1.063                                                                | 1.141                    | 1.015                    |                                  |                                  |
| ERO1L        | 1.063                                                                | 1.031                    | 0.913                    |                                  |                                  |
| APEX1        | 1.062                                                                | 0.954                    | 0.854                    |                                  |                                  |
| HADHB        | 1.062                                                                | 0.995                    | 0.886                    |                                  |                                  |
| TXNDC12      | 1.062                                                                | 0.991                    | 0.884                    |                                  |                                  |
| HSPA9        | 1.061                                                                | 1.088                    | 0.967                    |                                  |                                  |
| GLS          | 1.061                                                                | 1.087                    | 0.967                    |                                  |                                  |
| MRPL50       | 1.061                                                                | 0.872                    | 0.800                    |                                  | +                                |
| FKBP9        | 1.061                                                                | 1.074                    | 0.955                    |                                  |                                  |
| MIF          | 1.061                                                                | 1.003                    | 0.894                    |                                  |                                  |

| Protein name   | Average fold change in chromatin abundance (SILAC ratio UV vs no UV) | Forward L(no UV) / H(UV) | Reverse L(UV) / H(no UV) | Forward Significance B (p ≤0.05) | Reverse Significance B (p ≤0.05) |
|----------------|----------------------------------------------------------------------|--------------------------|--------------------------|----------------------------------|----------------------------------|
| BCL2L13        | 1.060                                                                | 0.955                    | 0.858                    |                                  |                                  |
| UBE2N;UBE2NL   | 1.060                                                                | 1.015                    | 0.905                    |                                  |                                  |
| DAP3           | 1.059                                                                | 0.915                    | 0.831                    |                                  |                                  |
| POM121C;POM121 | 1.059                                                                | 1.034                    | 0.922                    |                                  |                                  |
| MRPS36         | 1.059                                                                | 0.863                    | 0.797                    |                                  | +                                |
| PTPN11         | 1.058                                                                | 0.981                    | 0.881                    |                                  |                                  |
| MRPL48         | 1.058                                                                | 1.008                    | 0.903                    |                                  |                                  |
| RCN3           | 1.058                                                                | 0.927                    | 0.842                    |                                  | +                                |
| SQRDL          | 1.058                                                                | 1.076                    | 0.963                    |                                  |                                  |
| AKR1C3;AKR1C1  | 1.058                                                                | 0.980                    | 0.881                    |                                  |                                  |
| DPYSL2         | 1.057                                                                | 1.049                    | 0.938                    |                                  |                                  |
| DIABLO         | 1.057                                                                | 1.183                    | 1.074                    |                                  |                                  |
| ANXA6          | 1.057                                                                | 1.098                    | 0.984                    |                                  |                                  |
| TMPO           | 1.056                                                                | 0.951                    | 0.860                    |                                  |                                  |
| TTC29          | 1.056                                                                | 1.192                    | 1.087                    | +                                |                                  |
| ARMC10         | 1.056                                                                | 1.080                    | 0.969                    |                                  |                                  |
| UBE2V1;TMEM189 | 1.056                                                                | 0.933                    | 0.848                    |                                  |                                  |
| RPS3           | 1.056                                                                | 1.039                    | 0.932                    |                                  |                                  |
| NUP98          | 1.056                                                                | 0.950                    | 0.861                    |                                  |                                  |
| AIFM1          | 1.056                                                                | 1.016                    | 0.913                    |                                  |                                  |
| HP1BP3         | 1.055                                                                | 1.090                    | 0.979                    |                                  |                                  |
| DNAJC11        | 1.055                                                                | 1.105                    | 0.994                    |                                  |                                  |
| GLUD1;GLUD2    | 1.055                                                                | 1.038                    | 0.932                    |                                  |                                  |
| C22orf28       | 1.055                                                                | 1.007                    | 0.907                    |                                  |                                  |
| BLVRB          | 1.055                                                                | 0.886                    | 0.818                    |                                  | +                                |
| EHD1           | 1.054                                                                | 1.125                    | 1.017                    |                                  |                                  |
| FSCN1          | 1.054                                                                | 0.942                    | 0.858                    |                                  |                                  |
| G3BP1          | 1.053                                                                | 1.048                    | 0.945                    |                                  |                                  |
| MCU            | 1.053                                                                | 1.060                    | 0.955                    |                                  |                                  |
| COA3           | 1.053                                                                | 1.110                    | 1.004                    |                                  |                                  |
| SMC1A          | 1.053                                                                | 1.128                    | 1.023                    | +                                |                                  |
| HSPA4          | 1.053                                                                | 1.152                    | 1.048                    |                                  |                                  |
| TXNL1          | 1.053                                                                | 1.049                    | 0.946                    |                                  |                                  |
| DTYMK          | 1.053                                                                | 1.164                    | 1.061                    |                                  |                                  |
| ESD            | 1.053                                                                | 1.040                    | 0.938                    |                                  |                                  |
| GRN            | 1.053                                                                | 1.094                    | 0.989                    |                                  |                                  |
| UBA1           | 1.053                                                                | 1.006                    | 0.910                    |                                  |                                  |
| MICU1          | 1.052                                                                | 1.099                    | 0.995                    |                                  |                                  |
| COPA           | 1.052                                                                | 1.068                    | 0.965                    |                                  |                                  |
| RABL3          | 1.052                                                                | 1.166                    | 1.066                    |                                  |                                  |
| CAST           | 1.052                                                                | 1.088                    | 0.985                    |                                  |                                  |
| NOC3L          | 1.052                                                                | 0.934                    | 0.855                    |                                  |                                  |
| SYNPO2         | 1.052                                                                | 0.969                    | 0.882                    |                                  |                                  |
| CHMP2A         | 1.052                                                                | 1.156                    | 1.055                    |                                  |                                  |
| GANAB          | 1.051                                                                | 0.921                    | 0.846                    |                                  | +                                |
| NPEPPS         | 1.051                                                                | 1.051                    | 0.951                    |                                  |                                  |

| Protein name | Average fold change in chromatin abundance (SILAC ratio UV vs no UV) | Forward L(no UV) / H(UV) | Reverse L(UV) / H(no UV) | Forward Significance B (p ≤0.05) | Reverse Significance B (p ≤0.05) |
|--------------|----------------------------------------------------------------------|--------------------------|--------------------------|----------------------------------|----------------------------------|
| P4HA2        | 1.051                                                                | 1.001                    | 0.908                    |                                  |                                  |
| RAB8A        | 1.051                                                                | 1.046                    | 0.947                    |                                  |                                  |
| SSRP1        | 1.051                                                                | 1.097                    | 0.995                    |                                  |                                  |
| ATP5O        | 1.051                                                                | 1.028                    | 0.931                    |                                  |                                  |
| PSME1        | 1.051                                                                | 1.045                    | 0.946                    |                                  |                                  |
| VPS35        | 1.051                                                                | 1.067                    | 0.967                    |                                  |                                  |
| ACO1;IRP1    | 1.051                                                                | 1.100                    | 0.999                    |                                  |                                  |
| GSN          | 1.050                                                                | 1.092                    | 0.992                    |                                  |                                  |
| DCTD         | 1.050                                                                | 1.082                    | 0.982                    |                                  |                                  |
| EIF4G2       | 1.050                                                                | 1.104                    | 1.004                    |                                  |                                  |
| LARS         | 1.050                                                                | 0.968                    | 0.884                    |                                  |                                  |
| MGMT         | 1.050                                                                | 1.105                    | 1.005                    |                                  |                                  |
| RNPEP        | 1.050                                                                | 0.974                    | 0.888                    |                                  |                                  |
| CALD1        | 1.049                                                                | 0.989                    | 0.901                    |                                  |                                  |
| RMDN2        | 1.049                                                                | 1.083                    | 0.985                    |                                  |                                  |
| RBM39        | 1.049                                                                | 1.133                    | 1.035                    |                                  |                                  |
| TARS         | 1.049                                                                | 0.947                    | 0.869                    |                                  |                                  |
| MDH2         | 1.049                                                                | 1.066                    | 0.969                    |                                  |                                  |
| RBM3         | 1.049                                                                | 1.145                    | 1.050                    | +                                |                                  |
| SARS         | 1.049                                                                | 1.013                    | 0.922                    |                                  |                                  |
| HNRNPL       | 1.049                                                                | 1.067                    | 0.970                    |                                  |                                  |
| SDHB         | 1.049                                                                | 0.994                    | 0.906                    |                                  |                                  |
| NANS         | 1.048                                                                | 1.055                    | 0.960                    |                                  |                                  |
| RPS29        | 1.048                                                                | 0.996                    | 0.909                    |                                  |                                  |
| C17orf66     | 1.048                                                                | 1.199                    | 1.115                    | +                                | +                                |
| ARMCX3       | 1.048                                                                | 1.199                    | 1.115                    |                                  |                                  |
| LASP1        | 1.048                                                                | 0.949                    | 0.872                    |                                  |                                  |
| HMGA2        | 1.048                                                                | 0.791                    | 0.767                    |                                  | +                                |
| IGF2BP2      | 1.048                                                                | 0.979                    | 0.895                    |                                  |                                  |
| IFI16        | 1.048                                                                | 0.968                    | 0.887                    |                                  |                                  |
| CIRBP        | 1.048                                                                | 1.171                    | 1.082                    | +                                |                                  |
| LDHA         | 1.048                                                                | 1.045                    | 0.952                    |                                  |                                  |
| COPS6        | 1.048                                                                | 1.122                    | 1.028                    |                                  |                                  |
| HIST1H1C     | 1.048                                                                | 1.023                    | 0.933                    |                                  |                                  |
| SERPINH1     | 1.047                                                                | 0.864                    | 0.812                    |                                  | +                                |
| NOL6         | 1.047                                                                | 0.851                    | 0.804                    |                                  | +                                |
| MMGT1        | 1.047                                                                | 1.017                    | 0.927                    |                                  |                                  |
| RIC8A        | 1.047                                                                | 1.107                    | 1.013                    |                                  |                                  |
| ALDH1L1      | 1.047                                                                | 0.752                    | 0.745                    |                                  | +                                |
| WARS         | 1.047                                                                | 0.903                    | 0.840                    |                                  | +                                |
| H2AFY2       | 1.046                                                                | 1.153                    | 1.064                    | +                                |                                  |
| PRKCSH       | 1.046                                                                | 0.966                    | 0.887                    |                                  |                                  |
| DPYSL3       | 1.046                                                                | 1.042                    | 0.952                    |                                  |                                  |
| CORO1B       | 1.046                                                                | 1.039                    | 0.950                    |                                  |                                  |
| ARL2         | 1.046                                                                | 1.231                    | 1.161                    |                                  |                                  |
| LYPLA2       | 1.046                                                                | 1.092                    | 1.000                    |                                  |                                  |

| Protein name        | Average fold change in chromatin abundance (SILAC ratio UV vs no UV) | Forward L(no UV) / H(UV) | Reverse L(UV) / H(no UV) | Forward Significance B (p ≤0.05) | Reverse Significance B (p ≤0.05) |
|---------------------|----------------------------------------------------------------------|--------------------------|--------------------------|----------------------------------|----------------------------------|
| GNPNAT1             | 1.046                                                                | 1.139                    | 1.050                    |                                  |                                  |
| PDZD11              | 1.046                                                                | 1.151                    | 1.064                    |                                  |                                  |
| EIF2AK2             | 1.046                                                                | 1.096                    | 1.005                    |                                  |                                  |
| SPATA5L1            | 1.045                                                                | 0.838                    | 0.798                    |                                  | +                                |
| FH                  | 1.045                                                                | 1.044                    | 0.956                    |                                  |                                  |
| ATP5B               | 1.045                                                                | 0.986                    | 0.906                    |                                  |                                  |
| SFPQ                | 1.045                                                                | 0.913                    | 0.850                    |                                  | +                                |
| MICU2               | 1.045                                                                | 1.158                    | 1.073                    |                                  |                                  |
| OTUB1               | 1.045                                                                | 1.063                    | 0.974                    |                                  |                                  |
| PTCD1;ATP5J2;ATP5J: | 1.045                                                                | 0.946                    | 0.874                    |                                  |                                  |
| PRDX2               | 1.045                                                                | 0.992                    | 0.911                    |                                  |                                  |
| TBL2                | 1.044                                                                | 1.036                    | 0.949                    |                                  |                                  |
| TUFM                | 1.044                                                                | 1.027                    | 0.941                    |                                  |                                  |
| FAU                 | 1.044                                                                | 1.019                    | 0.935                    |                                  |                                  |
| DNAJA1              | 1.044                                                                | 1.162                    | 1.081                    |                                  |                                  |
| XPO1                | 1.044                                                                | 1.096                    | 1.009                    |                                  |                                  |
| ALDOC               | 1.044                                                                | 0.959                    | 0.887                    |                                  |                                  |
| PDCD6IP             | 1.043                                                                | 1.091                    | 1.004                    |                                  |                                  |
| MYO1D               | 1.043                                                                | 1.133                    | 1.048                    |                                  |                                  |
| VPS26A              | 1.043                                                                | 1.030                    | 0.946                    |                                  |                                  |
| PSMC1               | 1.043                                                                | 1.029                    | 0.946                    |                                  |                                  |
| PLS3                | 1.043                                                                | 1.049                    | 0.964                    |                                  |                                  |
| SRSF9               | 1.043                                                                | 1.149                    | 1.067                    |                                  |                                  |
| COPB2               | 1.043                                                                | 1.097                    | 1.012                    |                                  |                                  |
| FHL2                | 1.043                                                                | 1.003                    | 0.924                    |                                  |                                  |
| TUBB6               | 1.043                                                                | 0.993                    | 0.915                    |                                  |                                  |
| TOR1AIP1            | 1.042                                                                | 0.867                    | 0.821                    |                                  |                                  |
| EIF3A               | 1.042                                                                | 1.066                    | 0.981                    |                                  |                                  |
| MEMO1;C2orf4        | 1.042                                                                | 1.067                    | 0.983                    |                                  |                                  |
| DNAJC10             | 1.042                                                                | 1.054                    | 0.971                    |                                  |                                  |
| RMDN3               | 1.042                                                                | 0.970                    | 0.897                    |                                  |                                  |
| USO1                | 1.042                                                                | 1.072                    | 0.988                    |                                  |                                  |
| RPL38               | 1.042                                                                | 0.948                    | 0.880                    |                                  |                                  |
| TMEM109             | 1.042                                                                | 0.944                    | 0.878                    |                                  |                                  |
| MAPK1               | 1.042                                                                | 1.032                    | 0.951                    |                                  |                                  |
| PDAP1               | 1.041                                                                | 0.983                    | 0.909                    |                                  |                                  |
| EPDR1;UCC1          | 1.041                                                                | 1.111                    | 1.029                    |                                  |                                  |
| RAB18               | 1.041                                                                | 1.091                    | 1.009                    |                                  |                                  |
| SMC3                | 1.041                                                                | 1.091                    | 1.009                    |                                  |                                  |
| PLIN3               | 1.041                                                                | 1.070                    | 0.988                    |                                  |                                  |
| ARL8A               | 1.041                                                                | 1.039                    | 0.959                    |                                  |                                  |
| MRPS15              | 1.041                                                                | 0.895                    | 0.843                    |                                  |                                  |
| NCL                 | 1.041                                                                | 1.110                    | 1.029                    |                                  |                                  |
| UGGT1               | 1.041                                                                | 1.018                    | 0.940                    |                                  |                                  |
| WDR1                | 1.041                                                                | 1.093                    | 1.012                    |                                  |                                  |
| DECR2               | 1.041                                                                | 1.096                    | 1.015                    |                                  |                                  |

| Protein name       | Average fold change in chromatin abundance (SILAC ratio UV vs no UV) | Forward L(no UV) / H(UV) | Reverse L(UV) / H(no UV) | Forward Significance B (p ≤0.05) | Reverse Significance B (p ≤0.05) |
|--------------------|----------------------------------------------------------------------|--------------------------|--------------------------|----------------------------------|----------------------------------|
| MRPL9              | 1.041                                                                | 0.920                    | 0.861                    |                                  |                                  |
| LMCD1              | 1.041                                                                | 0.966                    | 0.897                    |                                  |                                  |
| ACTN1              | 1.041                                                                | 1.008                    | 0.932                    |                                  |                                  |
| PEBP1              | 1.041                                                                | 0.981                    | 0.909                    |                                  |                                  |
| TOMM40             | 1.040                                                                | 1.037                    | 0.957                    |                                  |                                  |
| XRCC6              | 1.040                                                                | 1.119                    | 1.040                    |                                  |                                  |
| ESYT1              | 1.040                                                                | 1.035                    | 0.957                    |                                  |                                  |
| GLB1               | 1.040                                                                | 0.947                    | 0.882                    |                                  |                                  |
| MARCKS             | 1.040                                                                | 0.911                    | 0.855                    |                                  | +                                |
| AFG3L2             | 1.040                                                                | 1.086                    | 1.006                    |                                  |                                  |
| TPM1               | 1.040                                                                | 0.869                    | 0.826                    |                                  | +                                |
| H2AFY              | 1.040                                                                | 0.972                    | 0.903                    |                                  |                                  |
| KHDRBS1            | 1.039                                                                | 1.027                    | 0.951                    |                                  |                                  |
| FAM162A            | 1.039                                                                | 1.048                    | 0.970                    |                                  |                                  |
| ARF4               | 1.039                                                                | 1.070                    | 0.991                    |                                  |                                  |
| FAM114A1;DKFZp686F | 1.039                                                                | 1.123                    | 1.047                    |                                  |                                  |
| GPX1               | 1.039                                                                | 0.958                    | 0.893                    |                                  |                                  |
| IMMT               | 1.039                                                                | 1.070                    | 0.992                    |                                  |                                  |
| TXNDC5             | 1.039                                                                | 1.003                    | 0.931                    |                                  |                                  |
| ARF1;ARF3          | 1.038                                                                | 1.059                    | 0.982                    |                                  |                                  |
| MAVS               | 1.038                                                                | 1.000                    | 0.928                    |                                  |                                  |
| VPS29              | 1.038                                                                | 1.008                    | 0.936                    |                                  |                                  |
| RPS12              | 1.038                                                                | 1.084                    | 1.007                    |                                  |                                  |
| SLC25A13           | 1.038                                                                | 0.921                    | 0.866                    |                                  |                                  |
| ANO10              | 1.038                                                                | 1.283                    | 1.261                    | +                                |                                  |
| HSPD1              | 1.038                                                                | 1.005                    | 0.934                    |                                  |                                  |
| MTCH1              | 1.038                                                                | 1.206                    | 1.150                    | +                                |                                  |
| QARS               | 1.037                                                                | 1.035                    | 0.962                    |                                  |                                  |
| RPS7               | 1.037                                                                | 1.047                    | 0.973                    |                                  |                                  |
| SEPT7              | 1.037                                                                | 1.013                    | 0.943                    |                                  |                                  |
| PAFAH1B2           | 1.037                                                                | 0.919                    | 0.866                    |                                  |                                  |
| ACAA2              | 1.037                                                                | 1.149                    | 1.082                    |                                  |                                  |
| ACTR2              | 1.037                                                                | 0.976                    | 0.911                    |                                  |                                  |
| GSTK1              | 1.037                                                                | 1.050                    | 0.977                    |                                  |                                  |
| PGK1               | 1.037                                                                | 0.991                    | 0.924                    |                                  |                                  |
| ATP5D              | 1.037                                                                | 1.035                    | 0.963                    |                                  |                                  |
| PRDX3              | 1.037                                                                | 1.043                    | 0.970                    |                                  |                                  |
| NAT14              | 1.036                                                                | 0.931                    | 0.876                    |                                  |                                  |
| ABCF1              | 1.036                                                                | 1.026                    | 0.955                    |                                  |                                  |
| DCTN3              | 1.036                                                                | 0.985                    | 0.919                    |                                  |                                  |
| TUBB               | 1.036                                                                | 1.009                    | 0.940                    |                                  |                                  |
| NME3               | 1.036                                                                | 0.971                    | 0.908                    |                                  |                                  |
| ZYX                | 1.036                                                                | 0.839                    | 0.810                    |                                  | +                                |
| RPL35A             | 1.036                                                                | 1.041                    | 0.970                    |                                  |                                  |
| HK1                | 1.036                                                                | 1.145                    | 1.079                    | +                                |                                  |
| STAT1              | 1.036                                                                | 1.048                    | 0.976                    |                                  |                                  |



| Protein name | Average fold change in chromatin abundance (SILAC ratio UV vs no UV) | Forward L(no UV) / H(UV) | Reverse L(UV) / H(no UV) | Forward Significance B (p ≤0.05) | Reverse Significance B (p ≤0.05) |
|--------------|----------------------------------------------------------------------|--------------------------|--------------------------|----------------------------------|----------------------------------|
| RPL29        | 1.036                                                                | 0.876                    | 0.836                    |                                  | +                                |
| VARS         | 1.036                                                                | 0.761                    | 0.763                    |                                  | +                                |
| PA2G4        | 1.036                                                                | 0.996                    | 0.929                    |                                  |                                  |
| NDUFB6       | 1.036                                                                | 0.842                    | 0.813                    |                                  | +                                |
| RCN1         | 1.036                                                                | 0.948                    | 0.890                    |                                  |                                  |
| SYNPO        | 1.036                                                                | 0.964                    | 0.902                    |                                  |                                  |
| MOGS         | 1.036                                                                | 0.906                    | 0.858                    |                                  |                                  |
| FAM180A      | 1.036                                                                | 1.329                    | 1.346                    | +                                | +                                |
| SUPT16H      | 1.036                                                                | 1.060                    | 0.989                    |                                  |                                  |
| HSP90B1      | 1.036                                                                | 1.006                    | 0.939                    |                                  |                                  |
| PKM          | 1.036                                                                | 1.013                    | 0.945                    |                                  |                                  |
| GM2A         | 1.036                                                                | 1.167                    | 1.106                    |                                  |                                  |
| P4HB         | 1.036                                                                | 0.995                    | 0.930                    |                                  |                                  |
| BTF3         | 1.035                                                                | 1.126                    | 1.058                    |                                  |                                  |
| CTSD         | 1.035                                                                | 1.108                    | 1.039                    |                                  |                                  |
| CDO1         | 1.035                                                                | 1.113                    | 1.044                    |                                  |                                  |
| PLOD1        | 1.035                                                                | 1.036                    | 0.966                    |                                  |                                  |
| CTSA         | 1.035                                                                | 1.146                    | 1.082                    | +                                |                                  |
| SAR1A        | 1.035                                                                | 1.103                    | 1.033                    |                                  |                                  |
| PDIA5        | 1.035                                                                | 1.062                    | 0.992                    |                                  |                                  |
| NIPSNAP3A    | 1.035                                                                | 1.139                    | 1.074                    |                                  |                                  |
| COX20        | 1.035                                                                | 0.935                    | 0.881                    |                                  |                                  |
| CAP1         | 1.035                                                                | 1.037                    | 0.968                    |                                  |                                  |
| ITGAM        | 1.035                                                                | 0.864                    | 0.830                    |                                  | +                                |
| ANXA1        | 1.035                                                                | 1.127                    | 1.061                    |                                  |                                  |
| RPS19        | 1.035                                                                | 1.075                    | 1.006                    |                                  |                                  |
| PITRM1       | 1.035                                                                | 0.974                    | 0.913                    |                                  |                                  |
| ICT1         | 1.034                                                                | 0.913                    | 0.865                    |                                  |                                  |
| C1QBP        | 1.034                                                                | 0.999                    | 0.935                    |                                  |                                  |
| S100A4       | 1.034                                                                | 1.176                    | 1.121                    | +                                | +                                |
| H1F0         | 1.034                                                                | 0.974                    | 0.914                    |                                  |                                  |
| PPA1         | 1.034                                                                | 0.949                    | 0.894                    |                                  |                                  |
| DDX1         | 1.034                                                                | 1.021                    | 0.955                    |                                  |                                  |
| RHOT2        | 1.034                                                                | 1.166                    | 1.109                    |                                  |                                  |
| ATP5C1       | 1.034                                                                | 1.081                    | 1.014                    |                                  |                                  |
| OSTF1        | 1.034                                                                | 1.113                    | 1.047                    |                                  |                                  |
| VIM          | 1.034                                                                | 1.059                    | 0.992                    |                                  |                                  |
| TIMM21       | 1.033                                                                | 1.031                    | 0.966                    |                                  |                                  |
| DUSP3        | 1.033                                                                | 1.046                    | 0.981                    |                                  |                                  |
| KRAS         | 1.033                                                                | 0.991                    | 0.930                    |                                  |                                  |
| PDIA6        | 1.033                                                                | 0.996                    | 0.935                    |                                  |                                  |
| DCTN5        | 1.033                                                                | 1.079                    | 1.014                    |                                  |                                  |
| UCHL3        | 1.033                                                                | 1.047                    | 0.982                    |                                  |                                  |
| CYB5A        | 1.032                                                                | 0.943                    | 0.891                    |                                  |                                  |
| KPNB1        | 1.032                                                                | 1.017                    | 0.954                    |                                  |                                  |
| FLNC         | 1.032                                                                | 1.014                    | 0.952                    |                                  |                                  |

| Protein name      | Average fold change in chromatin abundance (SILAC ratio UV vs no UV) | Forward L(no UV) / H(UV) | Reverse L(UV) / H(no UV) | Forward Significance B (p ≤0.05) | Reverse Significance B (p ≤0.05) |
|-------------------|----------------------------------------------------------------------|--------------------------|--------------------------|----------------------------------|----------------------------------|
| OXA1L             | 1.032                                                                | 1.238                    | 1.210                    | +                                |                                  |
| SOD2              | 1.032                                                                | 1.049                    | 0.985                    |                                  |                                  |
| TBCB;CKAP1        | 1.032                                                                | 1.143                    | 1.086                    |                                  |                                  |
| LGALS3            | 1.032                                                                | 1.133                    | 1.074                    | +                                |                                  |
| SYNE1             | 1.032                                                                | 1.072                    | 1.008                    |                                  |                                  |
| NDUFB10           | 1.032                                                                | 0.873                    | 0.840                    |                                  | +                                |
| GHITM             | 1.032                                                                | 1.191                    | 1.146                    |                                  |                                  |
| USP14             | 1.032                                                                | 1.008                    | 0.948                    |                                  |                                  |
| CALR              | 1.031                                                                | 0.989                    | 0.931                    |                                  |                                  |
| HSP90AB1          | 1.031                                                                | 1.039                    | 0.977                    |                                  |                                  |
| APOBEC3C          | 1.031                                                                | 1.295                    | 1.302                    | +                                | +                                |
| TMOD3             | 1.031                                                                | 1.103                    | 1.042                    |                                  |                                  |
| VAT1              | 1.031                                                                | 0.882                    | 0.847                    |                                  | +                                |
| PSAP              | 1.031                                                                | 1.053                    | 0.991                    |                                  |                                  |
| MRPS25            | 1.031                                                                | 0.869                    | 0.838                    |                                  | +                                |
| ARPC4;ARPC4-TTL3  | 1.031                                                                | 0.882                    | 0.847                    |                                  | +                                |
| DDX3X;DDX3Y       | 1.031                                                                | 1.114                    | 1.055                    |                                  |                                  |
| SCFD1             | 1.031                                                                | 1.021                    | 0.961                    |                                  |                                  |
| CENPB             | 1.031                                                                | 1.125                    | 1.067                    |                                  |                                  |
| SSR3              | 1.031                                                                | 0.840                    | 0.819                    |                                  | +                                |
| SLC25A12          | 1.031                                                                | 1.076                    | 1.015                    |                                  |                                  |
| EEF1D             | 1.031                                                                | 0.977                    | 0.922                    |                                  |                                  |
| GAA               | 1.031                                                                | 0.969                    | 0.915                    |                                  |                                  |
| EIF3I             | 1.031                                                                | 1.137                    | 1.082                    |                                  |                                  |
| ALDOA             | 1.031                                                                | 0.960                    | 0.908                    |                                  |                                  |
| SRSF1             | 1.030                                                                | 0.966                    | 0.913                    |                                  |                                  |
| CTSB              | 1.030                                                                | 1.084                    | 1.024                    |                                  |                                  |
| RPS5              | 1.030                                                                | 1.063                    | 1.002                    |                                  |                                  |
| ACTR3             | 1.030                                                                | 0.938                    | 0.891                    |                                  |                                  |
| PXDN              | 1.030                                                                | 0.951                    | 0.901                    |                                  |                                  |
| ATXN2L            | 1.030                                                                | 0.908                    | 0.868                    |                                  |                                  |
| RPS8              | 1.030                                                                | 0.993                    | 0.937                    |                                  |                                  |
| MRPL47            | 1.030                                                                | 1.005                    | 0.948                    |                                  |                                  |
|                   | 1.030                                                                | 0.957                    | 0.907                    |                                  |                                  |
| NENF              | 1.030                                                                | 1.034                    | 0.975                    |                                  |                                  |
| ATP5F1            | 1.030                                                                | 1.057                    | 0.997                    |                                  |                                  |
| HIST1H1A          | 1.030                                                                | 0.669                    | 0.719                    | +                                | +                                |
| NDUFA7            | 1.030                                                                | 1.088                    | 1.030                    |                                  |                                  |
| SERPINE2          | 1.030                                                                | 0.997                    | 0.941                    |                                  |                                  |
| SND1              | 1.030                                                                | 0.974                    | 0.921                    |                                  |                                  |
| LEPRE1            | 1.030                                                                | 0.935                    | 0.889                    |                                  |                                  |
| NME1-NME2;NME2;NM | 1.030                                                                | 0.926                    | 0.883                    |                                  |                                  |
| GSTM1;GSTM5;GSTM4 | 1.029                                                                | 1.019                    | 0.962                    |                                  |                                  |
| USP9X             | 1.029                                                                | 1.125                    | 1.071                    |                                  |                                  |
| PARP1             | 1.029                                                                | 1.044                    | 0.986                    |                                  |                                  |
| GBP1              | 1.029                                                                | 1.001                    | 0.945                    |                                  |                                  |

| Protein name       | Average fold change in chromatin abundance (SILAC ratio UV vs no UV) | Forward L(no UV) / H(UV) | Reverse L(UV) / H(no UV) | Forward Significance B (p ≤0.05) | Reverse Significance B (p ≤0.05) |
|--------------------|----------------------------------------------------------------------|--------------------------|--------------------------|----------------------------------|----------------------------------|
| PRDX6              | 1.029                                                                | 0.878                    | 0.847                    |                                  | +                                |
| TUBB3              | 1.029                                                                | 1.065                    | 1.006                    |                                  |                                  |
| SPANXB1            | 1.029                                                                | 1.294                    | 1.309                    | +                                | +                                |
| CENPC1             | 1.029                                                                | 1.114                    | 1.060                    |                                  |                                  |
| ARCN1              | 1.029                                                                | 1.047                    | 0.989                    |                                  |                                  |
| SLC25A10;MRPL12    | 1.029                                                                | 0.919                    | 0.878                    |                                  |                                  |
| VASP               | 1.029                                                                | 0.849                    | 0.827                    |                                  |                                  |
| NUTF2              | 1.029                                                                | 0.951                    | 0.904                    |                                  |                                  |
| HSPE1              | 1.029                                                                | 1.008                    | 0.953                    |                                  |                                  |
| TOMM70A            | 1.029                                                                | 1.047                    | 0.989                    |                                  |                                  |
| GSTP1              | 1.029                                                                | 0.929                    | 0.887                    |                                  |                                  |
| NNMT               | 1.029                                                                | 0.790                    | 0.789                    | +                                | +                                |
| DSTN               | 1.029                                                                | 1.026                    | 0.970                    |                                  |                                  |
| RARS               | 1.028                                                                | 1.000                    | 0.947                    |                                  |                                  |
| ARHGAP1            | 1.028                                                                | 0.986                    | 0.934                    |                                  |                                  |
| MTPN               | 1.028                                                                | 1.055                    | 0.999                    |                                  |                                  |
| MINOS1             | 1.028                                                                | 0.983                    | 0.932                    |                                  |                                  |
| AK3                | 1.028                                                                | 1.102                    | 1.049                    |                                  |                                  |
| MRPL49             | 1.028                                                                | 0.967                    | 0.919                    |                                  |                                  |
| MRPL22             | 1.027                                                                | 0.990                    | 0.939                    |                                  |                                  |
| GOT2               | 1.027                                                                | 0.976                    | 0.927                    |                                  |                                  |
| RPS10              | 1.027                                                                | 0.986                    | 0.936                    |                                  |                                  |
| PSIP1              | 1.027                                                                | 1.075                    | 1.021                    |                                  |                                  |
| COMMD3             | 1.027                                                                | 1.084                    | 1.031                    |                                  |                                  |
| RPS23              | 1.027                                                                | 1.104                    | 1.052                    |                                  |                                  |
| RPS9               | 1.027                                                                | 1.071                    | 1.017                    |                                  |                                  |
| PHLDB1             | 1.027                                                                | 1.091                    | 1.038                    |                                  |                                  |
| SUB1               | 1.027                                                                | 1.039                    | 0.986                    |                                  |                                  |
| MFGE8              | 1.027                                                                | 1.017                    | 0.965                    |                                  |                                  |
| ETFB               | 1.027                                                                | 1.046                    | 0.993                    |                                  |                                  |
| PEA15              | 1.027                                                                | 1.012                    | 0.960                    |                                  |                                  |
| FKBP3              | 1.026                                                                | 1.062                    | 1.010                    |                                  |                                  |
| PARK7              | 1.026                                                                | 0.931                    | 0.891                    |                                  |                                  |
| MRPL11             | 1.026                                                                | 0.998                    | 0.949                    |                                  |                                  |
| FLNA               | 1.026                                                                | 0.901                    | 0.868                    |                                  |                                  |
| ATP5A1             | 1.026                                                                | 1.014                    | 0.963                    |                                  |                                  |
| HNRNPK             | 1.026                                                                | 1.046                    | 0.994                    |                                  |                                  |
| FKBP1A;FKBP12-Exp2 | 1.026                                                                | 1.041                    | 0.989                    |                                  |                                  |
| AP3B1              | 1.026                                                                | 1.111                    | 1.063                    |                                  |                                  |
| SERPINB6           | 1.026                                                                | 1.020                    | 0.969                    |                                  |                                  |
| CROCC              | 1.026                                                                | 1.021                    | 0.970                    |                                  |                                  |
| HIST1H1D           | 1.026                                                                | 0.694                    | 0.737                    | +                                | +                                |
| ACTN1              | 1.026                                                                | 0.936                    | 0.896                    |                                  |                                  |
| MRPL13             | 1.026                                                                | 0.853                    | 0.834                    |                                  | +                                |
| EFTUD1             | 1.026                                                                | 1.146                    | 1.104                    | +                                | +                                |
| YWHAZ              | 1.026                                                                | 1.033                    | 0.982                    |                                  |                                  |

| Protein name       | Average fold change in chromatin abundance (SILAC ratio UV vs no UV) | Forward L(no UV) / H(UV) | Reverse L(UV) / H(no UV) | Forward Significance B (p ≤0.05) | Reverse Significance B (p ≤0.05) |
|--------------------|----------------------------------------------------------------------|--------------------------|--------------------------|----------------------------------|----------------------------------|
| CBR1               | 1.026                                                                | 1.062                    | 1.011                    |                                  |                                  |
| MAP4               | 1.025                                                                | 0.954                    | 0.912                    |                                  |                                  |
| AP2A2              | 1.025                                                                | 1.001                    | 0.952                    |                                  |                                  |
| H3F3B;H3F3A;H3F3C  | 1.025                                                                | 1.047                    | 0.996                    |                                  |                                  |
| EMC1               | 1.025                                                                | 0.918                    | 0.883                    |                                  |                                  |
| MRPL19             | 1.025                                                                | 0.831                    | 0.820                    |                                  | +                                |
| TPM3               | 1.025                                                                | 0.979                    | 0.933                    |                                  |                                  |
| CRABP2             | 1.025                                                                | 1.236                    | 1.228                    |                                  | +                                |
| RAB2A              | 1.025                                                                | 1.133                    | 1.090                    |                                  |                                  |
| CHCHD3             | 1.025                                                                | 1.062                    | 1.012                    |                                  |                                  |
| CYB5R3             | 1.025                                                                | 0.967                    | 0.923                    |                                  |                                  |
| TLN1               | 1.025                                                                | 1.042                    | 0.992                    |                                  |                                  |
| PHPT1              | 1.025                                                                | 1.088                    | 1.040                    |                                  |                                  |
| PPP1CB             | 1.025                                                                | 1.044                    | 0.994                    |                                  |                                  |
| HSPB7;DKFZp779D096 | 1.025                                                                | 1.037                    | 0.987                    |                                  |                                  |
| KLC1               | 1.025                                                                | 1.100                    | 1.053                    |                                  |                                  |
| TMEM205            | 1.025                                                                | 0.712                    | 0.748                    | +                                | +                                |
| CHCHD6             | 1.025                                                                | 1.003                    | 0.956                    |                                  |                                  |
| SCO1               | 1.025                                                                | 0.970                    | 0.927                    |                                  |                                  |
| SH3BGRL            | 1.024                                                                | 1.101                    | 1.054                    |                                  |                                  |
| FER1L4             | 1.024                                                                | 1.050                    | 1.001                    |                                  |                                  |
| HSP90AA1           | 1.024                                                                | 1.016                    | 0.968                    |                                  |                                  |
| RRP12              | 1.024                                                                | 0.863                    | 0.843                    |                                  |                                  |
| PPIB               | 1.024                                                                | 0.966                    | 0.924                    |                                  |                                  |
| NEXN               | 1.024                                                                | 0.996                    | 0.950                    |                                  |                                  |
| AK4                | 1.024                                                                | 0.971                    | 0.928                    |                                  |                                  |
| TRIOBP             | 1.024                                                                | 1.011                    | 0.964                    |                                  |                                  |
| PARVA              | 1.024                                                                | 1.093                    | 1.047                    |                                  |                                  |
| GBAS               | 1.024                                                                | 0.976                    | 0.933                    |                                  |                                  |
| H2AFV;H2AFZ        | 1.024                                                                | 0.998                    | 0.953                    |                                  |                                  |
| CNPY2              | 1.024                                                                | 0.903                    | 0.873                    |                                  |                                  |
| EWSR1              | 1.024                                                                | 0.934                    | 0.898                    |                                  |                                  |
| RUVBL2             | 1.024                                                                | 0.948                    | 0.910                    |                                  |                                  |
| PYGB               | 1.024                                                                | 1.050                    | 1.003                    |                                  |                                  |
| NSF                | 1.023                                                                | 1.015                    | 0.970                    |                                  |                                  |
| RPL36AL;RPL36A     | 1.023                                                                | 0.809                    | 0.808                    |                                  | +                                |
| ATAD3A;ATAD3B      | 1.023                                                                | 1.017                    | 0.972                    |                                  |                                  |
| COPE               | 1.023                                                                | 1.021                    | 0.975                    |                                  |                                  |
| GNL3               | 1.023                                                                | 0.991                    | 0.948                    |                                  |                                  |
| HDLBP              | 1.023                                                                | 1.012                    | 0.967                    |                                  |                                  |
| ST13;ST13P4;ST13P5 | 1.023                                                                | 1.026                    | 0.980                    |                                  |                                  |
| CAPZA1             | 1.023                                                                | 0.997                    | 0.954                    |                                  |                                  |
| CNPY4              | 1.023                                                                | 1.049                    | 1.004                    |                                  |                                  |
| EMD                | 1.023                                                                | 0.875                    | 0.855                    |                                  | +                                |
| HIST1H4A           | 1.023                                                                | 1.009                    | 0.965                    |                                  |                                  |
| CTSC               | 1.023                                                                | 1.114                    | 1.074                    |                                  |                                  |

| Protein name         | Average fold change in chromatin abundance (SILAC ratio UV vs no UV) | Forward L(no UV) / H(UV) | Reverse L(UV) / H(no UV) | Forward Significance B (p ≤0.05) | Reverse Significance B (p ≤0.05) |
|----------------------|----------------------------------------------------------------------|--------------------------|--------------------------|----------------------------------|----------------------------------|
| ACTN2                | 1.022                                                                | 1.041                    | 0.996                    |                                  |                                  |
| HNRPDL               | 1.022                                                                | 0.995                    | 0.953                    |                                  |                                  |
| ACLY                 | 1.022                                                                | 1.003                    | 0.960                    |                                  |                                  |
| RPS3A                | 1.022                                                                | 1.063                    | 1.019                    |                                  |                                  |
| RPS27A;UBB;UBC;UB    | 1.022                                                                | 1.090                    | 1.048                    |                                  |                                  |
| CSE1L                | 1.022                                                                | 0.954                    | 0.917                    |                                  |                                  |
| MARS                 | 1.022                                                                | 1.107                    | 1.068                    |                                  |                                  |
| PTMA                 | 1.022                                                                | 1.011                    | 0.968                    |                                  |                                  |
| TUBB2A;TUBB2B        | 1.022                                                                | 0.929                    | 0.897                    |                                  |                                  |
| GPD2                 | 1.022                                                                | 1.050                    | 1.007                    |                                  |                                  |
| MP68;C14orf2         | 1.022                                                                | 0.949                    | 0.913                    |                                  |                                  |
| ENO1                 | 1.022                                                                | 0.971                    | 0.932                    |                                  |                                  |
| SYNE3                | 1.022                                                                | 1.099                    | 1.059                    |                                  |                                  |
| DSP                  | 1.022                                                                | 0.977                    | 0.937                    |                                  |                                  |
| IER3IP1              | 1.022                                                                | 1.006                    | 0.964                    |                                  |                                  |
| AIMP2                | 1.022                                                                | 1.085                    | 1.044                    |                                  |                                  |
| SLC25A11             | 1.022                                                                | 1.011                    | 0.969                    |                                  |                                  |
| EIF5A;EIF5AL1;EIF5A2 | 1.022                                                                | 0.965                    | 0.927                    |                                  |                                  |
|                      | 1.022                                                                | 1.080                    | 1.038                    |                                  |                                  |
| FTH1                 | 1.021                                                                | 1.165                    | 1.138                    |                                  |                                  |
| RAB7A                | 1.021                                                                | 1.087                    | 1.046                    |                                  |                                  |
| EEF2                 | 1.021                                                                | 0.970                    | 0.932                    |                                  |                                  |
| MRPL46               | 1.021                                                                | 1.011                    | 0.969                    |                                  |                                  |
| FGF2                 | 1.021                                                                | 0.985                    | 0.946                    |                                  |                                  |
| PLOD3                | 1.021                                                                | 1.033                    | 0.991                    |                                  |                                  |
| ARHGDI A             | 1.021                                                                | 0.908                    | 0.882                    |                                  |                                  |
| NUDT21               | 1.021                                                                | 1.033                    | 0.991                    |                                  |                                  |
| RAB1A                | 1.021                                                                | 1.046                    | 1.005                    |                                  |                                  |
| KANK2                | 1.021                                                                | 1.051                    | 1.010                    |                                  |                                  |
| GPX8                 | 1.021                                                                | 0.922                    | 0.894                    |                                  |                                  |
| NR3C1                | 1.020                                                                | 1.197                    | 1.184                    |                                  |                                  |
| MSN                  | 1.020                                                                | 1.041                    | 1.000                    |                                  |                                  |
| RHOA;RHOC            | 1.020                                                                | 1.027                    | 0.986                    |                                  |                                  |
| PLEC                 | 1.020                                                                | 1.034                    | 0.993                    |                                  |                                  |
| HINT1                | 1.020                                                                | 1.040                    | 1.000                    |                                  |                                  |
| PGAM1                | 1.020                                                                | 0.874                    | 0.858                    |                                  | +                                |
| SET                  | 1.020                                                                | 1.046                    | 1.006                    |                                  |                                  |
| EIF4H                | 1.020                                                                | 0.920                    | 0.893                    |                                  |                                  |
| RAD21                | 1.020                                                                | 1.056                    | 1.016                    |                                  |                                  |
| BCLAF1               | 1.020                                                                | 1.123                    | 1.090                    |                                  |                                  |
| SRI                  | 1.020                                                                | 1.052                    | 1.012                    |                                  |                                  |
| EIF5B                | 1.020                                                                | 0.986                    | 0.949                    |                                  |                                  |
| SNX3                 | 1.020                                                                | 1.149                    | 1.123                    | +                                |                                  |
| SYNCRIP              | 1.019                                                                | 1.026                    | 0.987                    |                                  |                                  |
| VCP                  | 1.019                                                                | 1.031                    | 0.992                    |                                  |                                  |
| PISD                 | 1.019                                                                | 1.124                    | 1.093                    |                                  |                                  |

| Protein name        | Average fold change in chromatin abundance (SILAC ratio UV vs no UV) | Forward L(no UV) / H(UV) | Reverse L(UV) / H(no UV) | Forward Significance B (p ≤0.05) | Reverse Significance B (p ≤0.05) |
|---------------------|----------------------------------------------------------------------|--------------------------|--------------------------|----------------------------------|----------------------------------|
| RPS18               | 1.019                                                                | 1.010                    | 0.972                    |                                  |                                  |
| PDIA3               | 1.019                                                                | 0.972                    | 0.937                    |                                  |                                  |
| ANXA7               | 1.019                                                                | 1.028                    | 0.989                    |                                  |                                  |
| ETFA                | 1.019                                                                | 0.976                    | 0.941                    |                                  |                                  |
| PPP2R1A             | 1.019                                                                | 1.074                    | 1.037                    |                                  |                                  |
| RCN2                | 1.019                                                                | 0.885                    | 0.867                    |                                  |                                  |
| AGK                 | 1.019                                                                | 1.061                    | 1.023                    |                                  |                                  |
| MDH1                | 1.019                                                                | 1.048                    | 1.010                    |                                  |                                  |
| GNB2L1              | 1.019                                                                | 1.037                    | 0.999                    |                                  |                                  |
| LGALS1              | 1.019                                                                | 1.120                    | 1.090                    |                                  |                                  |
| ILK                 | 1.019                                                                | 1.053                    | 1.015                    |                                  |                                  |
| GLO1                | 1.019                                                                | 1.031                    | 0.993                    |                                  |                                  |
| NACA                | 1.019                                                                | 1.032                    | 0.995                    |                                  |                                  |
| STIP1               | 1.019                                                                | 0.996                    | 0.960                    |                                  |                                  |
| HMGB2               | 1.019                                                                | 0.973                    | 0.940                    |                                  |                                  |
| YWHAH               | 1.018                                                                | 1.077                    | 1.042                    |                                  |                                  |
| VCL                 | 1.018                                                                | 1.021                    | 0.985                    |                                  |                                  |
| CANX                | 1.018                                                                | 0.866                    | 0.855                    |                                  | +                                |
| ABHD14B             | 1.018                                                                | 0.962                    | 0.931                    |                                  |                                  |
| KIF5B               | 1.018                                                                | 1.080                    | 1.046                    |                                  |                                  |
| RPL31               | 1.018                                                                | 1.027                    | 0.991                    |                                  |                                  |
| TOR1AIP1            | 1.018                                                                | 0.992                    | 0.958                    |                                  |                                  |
| HIST1H2AJ;HIST1H2AF | 1.018                                                                | 0.939                    | 0.911                    |                                  |                                  |
| COMMD8              | 1.018                                                                | 1.056                    | 1.021                    |                                  |                                  |
| TMEM11              | 1.018                                                                | 0.895                    | 0.877                    |                                  |                                  |
| PSMA1               | 1.018                                                                | 1.030                    | 0.995                    |                                  |                                  |
| RDX                 | 1.017                                                                | 1.063                    | 1.029                    |                                  |                                  |
| RPS16               | 1.017                                                                | 1.006                    | 0.972                    |                                  |                                  |
| THRAP3              | 1.017                                                                | 1.038                    | 1.003                    |                                  |                                  |
| RPL27A              | 1.017                                                                | 0.995                    | 0.963                    |                                  |                                  |
| EIF3E               | 1.017                                                                | 1.045                    | 1.011                    |                                  |                                  |
| NAPA                | 1.017                                                                | 1.103                    | 1.074                    |                                  |                                  |
| SPTAN1              | 1.017                                                                | 1.039                    | 1.005                    |                                  |                                  |
| VAMP4               | 1.017                                                                | 1.216                    | 1.223                    | +                                |                                  |
| DCTN1               | 1.017                                                                | 1.072                    | 1.039                    |                                  |                                  |
| NDUFS1              | 1.017                                                                | 1.033                    | 0.999                    |                                  |                                  |
| PSMB2               | 1.017                                                                | 1.022                    | 0.988                    |                                  |                                  |
| SUN1;UNC84A         | 1.017                                                                | 1.109                    | 1.082                    |                                  |                                  |
| RPS27               | 1.017                                                                | 1.029                    | 0.996                    |                                  |                                  |
| CNN3                | 1.017                                                                | 1.022                    | 0.989                    |                                  |                                  |
| TPI1                | 1.017                                                                | 0.958                    | 0.930                    |                                  |                                  |
| CAPRIN1             | 1.017                                                                | 1.136                    | 1.114                    |                                  |                                  |
| EEF1B2              | 1.017                                                                | 0.899                    | 0.882                    |                                  |                                  |
| TPM4                | 1.017                                                                | 0.943                    | 0.917                    |                                  |                                  |
| TAGLN2              | 1.016                                                                | 1.000                    | 0.968                    |                                  |                                  |
| CALU                | 1.016                                                                | 0.984                    | 0.953                    |                                  |                                  |

| Protein name      | Average fold change in chromatin abundance (SILAC ratio UV vs no UV) | Forward L(no UV) / H(UV) | Reverse L(UV) / H(no UV) | Forward Significance B (p ≤0.05) | Reverse Significance B (p ≤0.05) |
|-------------------|----------------------------------------------------------------------|--------------------------|--------------------------|----------------------------------|----------------------------------|
| PRDX4             | 1.016                                                                | 0.907                    | 0.889                    |                                  |                                  |
| TAX1BP3           | 1.016                                                                | 1.125                    | 1.101                    |                                  |                                  |
| GAPDH             | 1.016                                                                | 1.053                    | 1.020                    |                                  |                                  |
| TBCA              | 1.016                                                                | 1.065                    | 1.034                    |                                  |                                  |
| MRPL43            | 1.016                                                                | 1.008                    | 0.976                    |                                  |                                  |
| UGDH              | 1.016                                                                | 0.988                    | 0.958                    |                                  |                                  |
| RPS11             | 1.016                                                                | 1.045                    | 1.013                    |                                  |                                  |
| PABPC1            | 1.016                                                                | 1.021                    | 0.989                    |                                  |                                  |
| RPS21             | 1.016                                                                | 1.029                    | 0.997                    |                                  |                                  |
| SWAP70            | 1.016                                                                | 1.023                    | 0.991                    |                                  |                                  |
| FIS1              | 1.016                                                                | 1.108                    | 1.083                    |                                  |                                  |
| 'SEP7             | 1.016                                                                | 0.995                    | 0.965                    |                                  |                                  |
| PTGIS             | 1.016                                                                | 0.932                    | 0.910                    |                                  |                                  |
| RAB1B             | 1.015                                                                | 1.069                    | 1.040                    |                                  |                                  |
| C9orf89           | 1.015                                                                | 0.991                    | 0.962                    |                                  |                                  |
| GNB2              | 1.015                                                                | 0.946                    | 0.922                    |                                  |                                  |
| UBTF              | 1.015                                                                | 1.153                    | 1.139                    | +                                | +                                |
| RAB5C             | 1.015                                                                | 1.022                    | 0.991                    |                                  |                                  |
| LEMD3             | 1.015                                                                | 1.068                    | 1.039                    |                                  |                                  |
| IFIT5             | 1.015                                                                | 1.271                    | 1.316                    |                                  | +                                |
| SNX9              | 1.015                                                                | 1.024                    | 0.994                    |                                  |                                  |
| TMPO              | 1.015                                                                | 0.869                    | 0.861                    |                                  |                                  |
| AARS              | 1.015                                                                | 0.992                    | 0.964                    |                                  |                                  |
| STOML2            | 1.015                                                                | 1.026                    | 0.996                    |                                  |                                  |
| EIF4A1;EIF4A2     | 1.015                                                                | 0.989                    | 0.960                    |                                  |                                  |
| HNRNPA1;HNRNPA1L2 | 1.015                                                                | 0.961                    | 0.935                    |                                  |                                  |
| PPIF              | 1.015                                                                | 1.009                    | 0.980                    |                                  |                                  |
| GPI               | 1.015                                                                | 1.030                    | 1.000                    |                                  |                                  |
| TLDC1;KIAA1609    | 1.015                                                                | 1.107                    | 1.084                    |                                  |                                  |
| SPTBN1            | 1.015                                                                | 1.057                    | 1.028                    |                                  |                                  |
| YWHAQ             | 1.015                                                                | 1.072                    | 1.045                    |                                  |                                  |
| RPS20             | 1.015                                                                | 0.934                    | 0.913                    |                                  |                                  |
| ANKFY1            | 1.014                                                                | 0.963                    | 0.938                    |                                  |                                  |
| RPL3              | 1.014                                                                | 1.027                    | 0.998                    |                                  |                                  |
| C11orf48          | 1.014                                                                | 1.034                    | 1.006                    |                                  |                                  |
| SEC31A            | 1.014                                                                | 1.013                    | 0.985                    |                                  |                                  |
| CNN2              | 1.014                                                                | 1.032                    | 1.004                    |                                  |                                  |
| GBA               | 1.014                                                                | 0.954                    | 0.931                    |                                  |                                  |
| PCBP2             | 1.014                                                                | 0.994                    | 0.968                    |                                  |                                  |
| SAFB2             | 1.014                                                                | 1.011                    | 0.984                    |                                  |                                  |
| PDIA4             | 1.014                                                                | 0.934                    | 0.915                    |                                  |                                  |
| GDI2              | 1.014                                                                | 0.993                    | 0.967                    |                                  |                                  |
| DHCR24            | 1.014                                                                | 1.138                    | 1.124                    |                                  |                                  |
| TPD52L2           | 1.014                                                                | 1.055                    | 1.028                    |                                  |                                  |
| RDH11             | 1.014                                                                | 0.946                    | 0.925                    |                                  |                                  |
| ACTG1             | 1.014                                                                | 1.055                    | 1.029                    |                                  |                                  |

| Protein name           | Average fold change in chromatin abundance (SILAC ratio UV vs no UV) | Forward L(no UV) / H(UV) | Reverse L(UV) / H(no UV) | Forward Significance B (p ≤0.05) | Reverse Significance B (p ≤0.05) |
|------------------------|----------------------------------------------------------------------|--------------------------|--------------------------|----------------------------------|----------------------------------|
| HEXB                   | 1.013                                                                | 1.059                    | 1.033                    |                                  |                                  |
| FLNB                   | 1.013                                                                | 0.880                    | 0.872                    |                                  |                                  |
| ANXA2;ANXA2P2          | 1.013                                                                | 0.986                    | 0.961                    |                                  |                                  |
| CAPZB                  | 1.013                                                                | 1.014                    | 0.987                    |                                  |                                  |
| SYNM                   | 1.013                                                                | 1.073                    | 1.048                    |                                  |                                  |
| RPLP0;RPLP0P6          | 1.013                                                                | 1.003                    | 0.977                    |                                  |                                  |
| HSPA8                  | 1.013                                                                | 1.006                    | 0.981                    |                                  |                                  |
| ARL3                   | 1.013                                                                | 1.015                    | 0.990                    |                                  |                                  |
| EIF1AX;EIF1AY          | 1.013                                                                | 1.049                    | 1.024                    |                                  |                                  |
| YWHAE                  | 1.013                                                                | 1.036                    | 1.011                    |                                  |                                  |
| TIMM50                 | 1.013                                                                | 0.947                    | 0.928                    |                                  |                                  |
| LEMD2                  | 1.013                                                                | 0.837                    | 0.841                    |                                  | +                                |
| PDLIM1                 | 1.013                                                                | 0.925                    | 0.908                    |                                  |                                  |
| EEF1A1P5;EEF1A1;EEF1A1 | 1.013                                                                | 0.954                    | 0.934                    |                                  |                                  |
| PIGS                   | 1.013                                                                | 0.983                    | 0.959                    |                                  |                                  |
| FKBP7                  | 1.013                                                                | 1.063                    | 1.039                    |                                  |                                  |
| ASPH                   | 1.012                                                                | 1.053                    | 1.029                    |                                  |                                  |
| RPL10                  | 1.012                                                                | 1.024                    | 0.999                    |                                  |                                  |
| USMG5                  | 1.012                                                                | 1.033                    | 1.009                    |                                  |                                  |
| TPT1                   | 1.012                                                                | 1.042                    | 1.018                    |                                  |                                  |
| SOD1                   | 1.012                                                                | 0.939                    | 0.921                    |                                  |                                  |
| EIF4G1                 | 1.012                                                                | 1.053                    | 1.030                    |                                  |                                  |
| EEA1                   | 1.012                                                                | 1.120                    | 1.106                    |                                  |                                  |
| LDHB                   | 1.012                                                                | 0.997                    | 0.973                    |                                  |                                  |
| ACIN1                  | 1.012                                                                | 1.007                    | 0.984                    |                                  |                                  |
| NME1                   | 1.012                                                                | 1.047                    | 1.024                    |                                  |                                  |
| PRKAR1A                | 1.012                                                                | 1.207                    | 1.224                    | +                                |                                  |
| PCBP1                  | 1.012                                                                | 1.053                    | 1.030                    |                                  |                                  |
| FKBP8                  | 1.012                                                                | 1.198                    | 1.212                    |                                  |                                  |
| MT-ATP6                | 1.012                                                                | 1.040                    | 1.018                    |                                  |                                  |
| CPNE1                  | 1.011                                                                | 0.911                    | 0.899                    |                                  |                                  |
| SRSF2;SFRS2;SRSF8      | 1.011                                                                | 0.920                    | 0.907                    |                                  |                                  |
| HYOU1                  | 1.011                                                                | 0.961                    | 0.943                    |                                  |                                  |
| PRPS2;PRPS1            | 1.011                                                                | 0.934                    | 0.919                    |                                  |                                  |
| ACTN4                  | 1.011                                                                | 1.017                    | 0.995                    |                                  |                                  |
| BANF1                  | 1.011                                                                | 0.813                    | 0.827                    | +                                | +                                |
| STX2                   | 1.011                                                                | 0.994                    | 0.973                    |                                  |                                  |
| C1orf123               | 1.011                                                                | 0.921                    | 0.909                    |                                  |                                  |
| PNPO                   | 1.011                                                                | 1.097                    | 1.082                    |                                  |                                  |
| AKAP2                  | 1.011                                                                | 1.107                    | 1.093                    |                                  |                                  |
| SFXN1                  | 1.011                                                                | 0.888                    | 0.882                    |                                  |                                  |
| MRPL1                  | 1.011                                                                | 1.009                    | 0.988                    |                                  |                                  |
| HNRNPH1                | 1.011                                                                | 0.949                    | 0.933                    |                                  |                                  |
| TCP1                   | 1.010                                                                | 1.002                    | 0.981                    |                                  |                                  |
| RPS25                  | 1.010                                                                | 1.081                    | 1.064                    |                                  |                                  |
| EIF1                   | 1.010                                                                | 1.124                    | 1.115                    |                                  |                                  |



| Protein name        | Average fold change in chromatin abundance (SILAC ratio UV vs no UV) | Forward L(no UV) / H(UV) | Reverse L(UV) / H(no UV) | Forward Significance B (p ≤0.05) | Reverse Significance B (p ≤0.05) |
|---------------------|----------------------------------------------------------------------|--------------------------|--------------------------|----------------------------------|----------------------------------|
| COX7A2              | 1.010                                                                | 0.997                    | 0.977                    |                                  |                                  |
| NDUFS7              | 1.010                                                                | 0.999                    | 0.979                    |                                  |                                  |
| RPL19               | 1.010                                                                | 1.028                    | 1.008                    |                                  |                                  |
| RSU1                | 1.010                                                                | 0.991                    | 0.972                    |                                  |                                  |
| MT-CO3              | 1.010                                                                | 0.926                    | 0.914                    |                                  |                                  |
| PTPLAD1             | 1.010                                                                | 0.762                    | 0.795                    | +                                | +                                |
| PTMS                | 1.010                                                                | 0.926                    | 0.914                    |                                  |                                  |
| PPIA                | 1.010                                                                | 0.995                    | 0.977                    |                                  |                                  |
| RPS17L;RPS17        | 1.010                                                                | 1.025                    | 1.005                    |                                  |                                  |
| AK2                 | 1.010                                                                | 0.903                    | 0.896                    |                                  |                                  |
| LPP                 | 1.010                                                                | 0.843                    | 0.850                    |                                  |                                  |
| HEBP1               | 1.010                                                                | 1.012                    | 0.993                    |                                  |                                  |
| EXOC3               | 1.010                                                                | 0.888                    | 0.884                    |                                  |                                  |
| COPZ2               | 1.010                                                                | 1.023                    | 1.004                    |                                  |                                  |
| HIST2H3A;HIST3H3    | 1.009                                                                | 0.998                    | 0.980                    |                                  |                                  |
| PGLS                | 1.009                                                                | 0.761                    | 0.795                    |                                  | +                                |
| RAI14               | 1.009                                                                | 1.024                    | 1.005                    |                                  |                                  |
| SRSF10              | 1.009                                                                | 1.022                    | 1.004                    |                                  |                                  |
| TSN                 | 1.009                                                                | 0.977                    | 0.960                    |                                  |                                  |
| CDC42               | 1.009                                                                | 0.947                    | 0.934                    |                                  |                                  |
| CAPNS1              | 1.009                                                                | 1.142                    | 1.141                    |                                  |                                  |
| DBN1                | 1.009                                                                | 0.940                    | 0.928                    |                                  |                                  |
| ATAD1               | 1.009                                                                | 1.195                    | 1.215                    |                                  | +                                |
| IKBIP               | 1.009                                                                | 0.973                    | 0.958                    |                                  |                                  |
| AKAP9               | 1.009                                                                | 1.034                    | 1.017                    |                                  |                                  |
| RPL6                | 1.009                                                                | 0.990                    | 0.974                    |                                  |                                  |
| ANXA4               | 1.009                                                                | 1.110                    | 1.102                    |                                  | +                                |
| MGAT1               | 1.009                                                                | 1.134                    | 1.132                    |                                  |                                  |
| DEGS1               | 1.009                                                                | 1.131                    | 1.129                    |                                  |                                  |
| STAU1               | 1.008                                                                | 1.136                    | 1.136                    |                                  |                                  |
| GPX4                | 1.008                                                                | 0.949                    | 0.937                    |                                  |                                  |
| MRPS11              | 1.008                                                                | 1.034                    | 1.018                    |                                  |                                  |
| NDUFA2              | 1.008                                                                | 0.936                    | 0.926                    |                                  |                                  |
| HSPA5               | 1.008                                                                | 0.941                    | 0.930                    |                                  |                                  |
| NDUFS2              | 1.008                                                                | 0.991                    | 0.975                    |                                  |                                  |
| NEK7                | 1.008                                                                | 1.024                    | 1.008                    |                                  |                                  |
| MCFD2               | 1.008                                                                | 0.936                    | 0.926                    |                                  |                                  |
| HSD17B10            | 1.008                                                                | 0.928                    | 0.919                    |                                  |                                  |
| TFAM                | 1.008                                                                | 0.972                    | 0.958                    |                                  |                                  |
| HIST1H3A            | 1.008                                                                | 1.072                    | 1.060                    |                                  |                                  |
| AFAP1               | 1.008                                                                | 1.070                    | 1.057                    |                                  |                                  |
| NDUFB11             | 1.008                                                                | 0.720                    | 0.772                    | +                                | +                                |
| MYO1C               | 1.008                                                                | 0.982                    | 0.967                    |                                  |                                  |
| RAB11B              | 1.008                                                                | 1.087                    | 1.077                    |                                  |                                  |
| HIST2H2BE;HIST1H2BI | 1.008                                                                | 0.974                    | 0.960                    |                                  |                                  |
| RDH14               | 1.007                                                                | 1.019                    | 1.004                    |                                  |                                  |

| Protein name       | Average fold change in chromatin abundance (SILAC ratio UV vs no UV) | Forward L(no UV) / H(UV) | Reverse L(UV) / H(no UV) | Forward Significance B (p ≤0.05) | Reverse Significance B (p ≤0.05) |
|--------------------|----------------------------------------------------------------------|--------------------------|--------------------------|----------------------------------|----------------------------------|
| RPS4X;RPS4Y2;RPS4Y | 1.007                                                                | 0.985                    | 0.971                    |                                  |                                  |
| HIST1H2BM;HIST1H2B | 1.007                                                                | 1.050                    | 1.037                    |                                  |                                  |
| HNRNPD             | 1.007                                                                | 1.077                    | 1.067                    |                                  |                                  |
| MRPL18             | 1.007                                                                | 0.986                    | 0.973                    |                                  |                                  |
| COPG1              | 1.007                                                                | 0.948                    | 0.938                    |                                  |                                  |
| CNP                | 1.007                                                                | 1.100                    | 1.093                    |                                  |                                  |
| MGST3              | 1.007                                                                | 1.070                    | 1.059                    |                                  |                                  |
| PHGDH              | 1.007                                                                | 0.857                    | 0.864                    |                                  | +                                |
| FASN               | 1.007                                                                | 1.028                    | 1.015                    |                                  |                                  |
| HDGFRP2            | 1.007                                                                | 0.911                    | 0.907                    |                                  |                                  |
| ECHS1              | 1.007                                                                | 0.995                    | 0.981                    |                                  |                                  |
| CAPN2              | 1.007                                                                | 1.087                    | 1.079                    |                                  |                                  |
| SRRT               | 1.007                                                                | 0.948                    | 0.938                    |                                  |                                  |
| PYCR1              | 1.007                                                                | 0.919                    | 0.914                    |                                  |                                  |
| CALM1;CALM2;CALM3  | 1.006                                                                | 1.021                    | 1.008                    |                                  |                                  |
| HSPA1A             | 1.006                                                                | 1.019                    | 1.007                    |                                  |                                  |
| CHMP6              | 1.006                                                                | 0.992                    | 0.980                    |                                  |                                  |
| LUZP1              | 1.006                                                                | 0.919                    | 0.914                    |                                  |                                  |
| RPS26;RPS26P11     | 1.006                                                                | 1.032                    | 1.020                    |                                  |                                  |
| SYNJ2BP            | 1.006                                                                | 1.120                    | 1.121                    |                                  |                                  |
| NAP1L1             | 1.006                                                                | 0.962                    | 0.952                    |                                  |                                  |
| UBAP2L             | 1.006                                                                | 1.005                    | 0.993                    |                                  |                                  |
| ARPC1B             | 1.006                                                                | 1.071                    | 1.062                    |                                  |                                  |
| HIBADH             | 1.006                                                                | 1.001                    | 0.989                    |                                  |                                  |
| ACTC1;ACTA1;ACTA2; | 1.006                                                                | 0.944                    | 0.937                    |                                  |                                  |
| PSMB3              | 1.006                                                                | 1.019                    | 1.007                    |                                  |                                  |
| TMEM173            | 1.006                                                                | 1.011                    | 0.999                    |                                  |                                  |
| RPS28              | 1.006                                                                | 1.014                    | 1.002                    |                                  |                                  |
| PFDN2              | 1.006                                                                | 1.063                    | 1.053                    |                                  |                                  |
| HSP90AB2P          | 1.006                                                                | 0.982                    | 0.971                    |                                  |                                  |
| PFN1               | 1.006                                                                | 1.029                    | 1.017                    |                                  |                                  |
| SRP19              | 1.006                                                                | 1.017                    | 1.006                    |                                  |                                  |
| CTTN               | 1.006                                                                | 1.029                    | 1.018                    |                                  |                                  |
| DAD1               | 1.006                                                                | 0.850                    | 0.861                    |                                  |                                  |
| MLEC               | 1.006                                                                | 0.913                    | 0.911                    |                                  |                                  |
| COX7A2L            | 1.006                                                                | 1.034                    | 1.023                    |                                  |                                  |
| RAB9A              | 1.005                                                                | 1.111                    | 1.111                    |                                  |                                  |
| HLA-A              | 1.005                                                                | 0.968                    | 0.959                    |                                  |                                  |
| GNL2               | 1.005                                                                | 0.870                    | 0.877                    |                                  |                                  |
| CFL2               | 1.005                                                                | 1.005                    | 0.994                    |                                  |                                  |
| MYH9               | 1.005                                                                | 0.972                    | 0.962                    |                                  |                                  |
| MRPL44             | 1.005                                                                | 1.068                    | 1.061                    |                                  |                                  |
| CRYZ               | 1.005                                                                | 1.116                    | 1.118                    |                                  |                                  |
| RAB23              | 1.005                                                                | 1.085                    | 1.080                    |                                  |                                  |
| ANXA5              | 1.005                                                                | 1.041                    | 1.031                    |                                  |                                  |
| RPS15A             | 1.005                                                                | 1.045                    | 1.035                    |                                  |                                  |

| Protein name      | Average fold change in chromatin abundance (SILAC ratio UV vs no UV) | Forward L(no UV) / H(UV) | Reverse L(UV) / H(no UV) | Forward Significance B (p ≤0.05) | Reverse Significance B (p ≤0.05) |
|-------------------|----------------------------------------------------------------------|--------------------------|--------------------------|----------------------------------|----------------------------------|
| PSMB1             | 1.005                                                                | 0.944                    | 0.938                    |                                  |                                  |
| TUBB4B            | 1.005                                                                | 0.900                    | 0.901                    |                                  |                                  |
| IMP4              | 1.005                                                                | 1.076                    | 1.071                    |                                  |                                  |
| NDUFB8            | 1.005                                                                | 0.776                    | 0.811                    |                                  | +                                |
| RPS14             | 1.005                                                                | 0.874                    | 0.880                    |                                  |                                  |
| S100A6            | 1.005                                                                | 1.042                    | 1.034                    |                                  |                                  |
| VPS8              | 1.005                                                                | 1.076                    | 1.071                    |                                  |                                  |
| SMARCA5           | 1.005                                                                | 1.095                    | 1.094                    |                                  |                                  |
| CCDC90B;MDS025    | 1.005                                                                | 1.072                    | 1.067                    |                                  |                                  |
| NDUFS3            | 1.005                                                                | 0.962                    | 0.955                    |                                  |                                  |
| NDUFS4            | 1.005                                                                | 1.119                    | 1.124                    |                                  |                                  |
| RAC1;RAC3         | 1.004                                                                | 0.892                    | 0.896                    |                                  |                                  |
| MAP1B             | 1.004                                                                | 1.020                    | 1.011                    |                                  |                                  |
| CYB5B             | 1.004                                                                | 0.916                    | 0.915                    |                                  |                                  |
| HMGA1             | 1.004                                                                | 0.845                    | 0.859                    |                                  |                                  |
| MPRIP             | 1.004                                                                | 1.019                    | 1.010                    |                                  |                                  |
| IARS2             | 1.004                                                                | 1.038                    | 1.030                    |                                  |                                  |
| SUMF2             | 1.004                                                                | 0.890                    | 0.894                    |                                  |                                  |
| DBI               | 1.004                                                                | 0.980                    | 0.973                    |                                  |                                  |
| PRDX1             | 1.004                                                                | 1.004                    | 0.996                    |                                  |                                  |
| RAB5B             | 1.004                                                                | 1.125                    | 1.133                    |                                  |                                  |
| SEPT2             | 1.004                                                                | 1.009                    | 1.001                    |                                  |                                  |
| NQO1              | 1.004                                                                | 0.962                    | 0.956                    |                                  |                                  |
| RPL39P5;RPL39     | 1.004                                                                | 0.714                    | 0.773                    | +                                | +                                |
| PSMD5             | 1.003                                                                | 1.001                    | 0.994                    |                                  |                                  |
| RPSA;RPSAP58      | 1.003                                                                | 0.996                    | 0.989                    |                                  |                                  |
| EXOC4             | 1.003                                                                | 0.997                    | 0.990                    |                                  |                                  |
| AGA               | 1.003                                                                | 0.997                    | 0.990                    |                                  |                                  |
| DERL1             | 1.003                                                                | 0.804                    | 0.831                    |                                  |                                  |
| AP3S1             | 1.003                                                                | 0.939                    | 0.937                    |                                  |                                  |
| AK1               | 1.003                                                                | 1.035                    | 1.029                    |                                  |                                  |
| PDCD6             | 1.003                                                                | 0.996                    | 0.989                    |                                  |                                  |
| NDUFB3            | 1.003                                                                | 0.948                    | 0.945                    |                                  |                                  |
| DEK               | 1.003                                                                | 1.026                    | 1.020                    |                                  |                                  |
| ARPC3             | 1.003                                                                | 0.907                    | 0.910                    |                                  |                                  |
| NDUFC2;NDUFC2-KCT | 1.003                                                                | 0.976                    | 0.971                    |                                  |                                  |
| PIN1              | 1.003                                                                | 1.042                    | 1.037                    |                                  |                                  |
| PSMB8             | 1.003                                                                | 0.948                    | 0.945                    |                                  |                                  |
| BAX               | 1.003                                                                | 1.008                    | 1.002                    |                                  |                                  |
| SURF1             | 1.003                                                                | 0.935                    | 0.934                    |                                  |                                  |
| RIN1              | 1.003                                                                | 1.224                    | 1.280                    |                                  |                                  |
| CAMK2D            | 1.003                                                                | 1.041                    | 1.037                    |                                  |                                  |
| DDRGK1            | 1.003                                                                | 0.928                    | 0.928                    |                                  |                                  |
| RPL9              | 1.003                                                                | 0.997                    | 0.991                    |                                  |                                  |
| DST               | 1.003                                                                | 1.175                    | 1.204                    | +                                | +                                |
| MYL9              | 1.003                                                                | 1.105                    | 1.111                    |                                  |                                  |

| Protein name | Average fold change in chromatin abundance (SILAC ratio UV vs no UV) | Forward L(no UV) / H(UV) | Reverse L(UV) / H(no UV) | Forward Significance B (p ≤0.05) | Reverse Significance B (p ≤0.05) |
|--------------|----------------------------------------------------------------------|--------------------------|--------------------------|----------------------------------|----------------------------------|
| CYB5R1       | 1.003                                                                | 1.007                    | 1.002                    |                                  |                                  |
| GNS          | 1.002                                                                | 1.136                    | 1.150                    |                                  |                                  |
| DYNC1H1      | 1.002                                                                | 1.021                    | 1.016                    |                                  |                                  |
| RAP1B        | 1.002                                                                | 1.032                    | 1.027                    |                                  |                                  |
| BCAP29       | 1.002                                                                | 1.126                    | 1.138                    |                                  |                                  |
| GSTO1        | 1.002                                                                | 1.012                    | 1.007                    |                                  |                                  |
| TMEM256      | 1.002                                                                | 0.963                    | 0.960                    |                                  |                                  |
| ABAT         | 1.002                                                                | 0.976                    | 0.973                    |                                  |                                  |
| TIMM17B      | 1.002                                                                | 0.985                    | 0.981                    |                                  |                                  |
| SLC25A22     | 1.002                                                                | 0.994                    | 0.990                    |                                  |                                  |
| HNRNPA2B1    | 1.002                                                                | 0.966                    | 0.963                    |                                  |                                  |
| RHOG         | 1.002                                                                | 0.891                    | 0.899                    |                                  |                                  |
| SDF2         | 1.002                                                                | 1.005                    | 1.001                    |                                  |                                  |
| RAB10        | 1.002                                                                | 1.030                    | 1.027                    |                                  |                                  |
| HIST1H2BJ    | 1.002                                                                | 0.987                    | 0.984                    |                                  |                                  |
| RPS13        | 1.002                                                                | 0.936                    | 0.937                    |                                  |                                  |
| SEC23A       | 1.001                                                                | 0.908                    | 0.913                    |                                  |                                  |
| SEPT11       | 1.001                                                                | 0.954                    | 0.954                    |                                  |                                  |
| SEC22B       | 1.001                                                                | 1.002                    | 0.999                    |                                  |                                  |
| FKBP4        | 1.001                                                                | 0.924                    | 0.927                    |                                  |                                  |
| PSMA6        | 1.001                                                                | 1.022                    | 1.019                    |                                  |                                  |
| CSNK2B       | 1.001                                                                | 0.936                    | 0.937                    |                                  |                                  |
| IQGAP1       | 1.001                                                                | 0.996                    | 0.993                    |                                  |                                  |
| ERP29        | 1.001                                                                | 0.889                    | 0.898                    |                                  |                                  |
| PFN2         | 1.001                                                                | 1.072                    | 1.076                    |                                  |                                  |
| SH3BGRL3     | 1.001                                                                | 1.069                    | 1.072                    |                                  |                                  |
| RPL8         | 1.001                                                                | 1.021                    | 1.019                    |                                  |                                  |
| ATP2A2       | 1.001                                                                | 0.967                    | 0.967                    |                                  |                                  |
| ECI1;DCI     | 1.001                                                                | 1.016                    | 1.015                    |                                  |                                  |
| GLIPR2       | 1.001                                                                | 0.876                    | 0.889                    |                                  |                                  |
| HNRNPA0      | 1.000                                                                | 1.020                    | 1.019                    |                                  |                                  |
| CAPN1        | 1.000                                                                | 1.057                    | 1.060                    |                                  |                                  |
| NDRG1        | 1.000                                                                | 1.080                    | 1.086                    |                                  |                                  |
| BAZ1B        | 1.000                                                                | 1.090                    | 1.097                    |                                  |                                  |
| CMPK1        | 1.000                                                                | 1.008                    | 1.007                    |                                  |                                  |
| DBNL         | 1.000                                                                | 0.896                    | 0.905                    |                                  |                                  |
| COMT         | 1.000                                                                | 0.985                    | 0.985                    |                                  |                                  |
| SAFB         | 1.000                                                                | 0.954                    | 0.956                    |                                  |                                  |
| GMFB         | 1.000                                                                | 1.014                    | 1.014                    |                                  |                                  |
| UROD         | 1.000                                                                | 1.057                    | 1.060                    |                                  |                                  |
| C14orf166    | 1.000                                                                | 0.993                    | 0.993                    |                                  |                                  |
| DGKA         | 1.000                                                                | 0.990                    | 0.990                    |                                  |                                  |
| RYBP         | 1.000                                                                | 1.034                    | 1.036                    |                                  |                                  |
| SRSF3        | 1.000                                                                | 0.889                    | 0.901                    |                                  |                                  |
| ARPC5        | 1.000                                                                | 1.012                    | 1.013                    |                                  |                                  |
| VDAC2        | 1.000                                                                | 1.020                    | 1.021                    |                                  |                                  |

| Protein name        | Average fold change in chromatin abundance (SILAC ratio UV vs no UV) | Forward L(no UV) / H(UV) | Reverse L(UV) / H(no UV) | Forward Significance B (p ≤0.05) | Reverse Significance B (p ≤0.05) |
|---------------------|----------------------------------------------------------------------|--------------------------|--------------------------|----------------------------------|----------------------------------|
| INA;NEFM;NEFL       | 0.999                                                                | 0.960                    | 0.963                    |                                  |                                  |
| ARF6                | 0.999                                                                | 1.011                    | 1.013                    |                                  |                                  |
| PSMD2               | 0.999                                                                | 0.999                    | 1.001                    |                                  |                                  |
| GNB1                | 0.999                                                                | 0.987                    | 0.989                    |                                  |                                  |
| HIST1H2AC;HIST3H2A; | 0.999                                                                | 1.005                    | 1.007                    |                                  |                                  |
| MTCH2               | 0.999                                                                | 0.984                    | 0.986                    |                                  |                                  |
| SPR                 | 0.999                                                                | 1.023                    | 1.026                    |                                  |                                  |
| IQGAP2              | 0.999                                                                | 0.995                    | 0.997                    |                                  |                                  |
| CFL1                | 0.999                                                                | 0.983                    | 0.985                    |                                  |                                  |
| PCMT1               | 0.999                                                                | 0.934                    | 0.941                    |                                  |                                  |
| EMC3                | 0.999                                                                | 0.984                    | 0.987                    |                                  |                                  |
| CYC1                | 0.999                                                                | 0.887                    | 0.901                    |                                  |                                  |
| RPL4                | 0.999                                                                | 0.958                    | 0.963                    |                                  |                                  |
| PFDN5               | 0.999                                                                | 1.130                    | 1.153                    |                                  |                                  |
| WIBG                | 0.999                                                                | 0.907                    | 0.917                    |                                  |                                  |
| OPA1                | 0.998                                                                | 1.121                    | 1.142                    |                                  |                                  |
| S100A13             | 0.998                                                                | 1.023                    | 1.027                    |                                  |                                  |
| ITPA                | 0.998                                                                | 0.999                    | 1.002                    |                                  |                                  |
| MACF1               | 0.998                                                                | 1.011                    | 1.015                    |                                  |                                  |
| S100A11             | 0.998                                                                | 1.080                    | 1.091                    |                                  |                                  |
| CUL4B               | 0.998                                                                | 0.905                    | 0.916                    |                                  |                                  |
| CORO1C              | 0.998                                                                | 0.962                    | 0.967                    |                                  |                                  |
| ERGIC1              | 0.998                                                                | 1.028                    | 1.033                    |                                  |                                  |
| CBR3                | 0.998                                                                | 1.015                    | 1.020                    |                                  |                                  |
| TMED5               | 0.998                                                                | 1.007                    | 1.011                    |                                  |                                  |
| HNRNPH3             | 0.998                                                                | 0.946                    | 0.952                    |                                  |                                  |
| NDUFB9              | 0.997                                                                | 0.974                    | 0.980                    |                                  |                                  |
| ANXA11              | 0.997                                                                | 1.066                    | 1.077                    |                                  |                                  |
| CBX5                | 0.997                                                                | 1.109                    | 1.130                    |                                  |                                  |
| TOP1                | 0.997                                                                | 0.977                    | 0.983                    |                                  |                                  |
| ZMPSTE24            | 0.997                                                                | 1.014                    | 1.020                    |                                  |                                  |
| MRPL15              | 0.997                                                                | 0.854                    | 0.877                    |                                  |                                  |
| CAND1               | 0.997                                                                | 0.941                    | 0.949                    |                                  |                                  |
| SRM                 | 0.997                                                                | 0.983                    | 0.988                    |                                  |                                  |
| TALDO1              | 0.997                                                                | 0.987                    | 0.993                    |                                  |                                  |
| SLAIN2              | 0.997                                                                | 0.961                    | 0.968                    |                                  |                                  |
| ATP6V1D             | 0.997                                                                | 1.125                    | 1.150                    |                                  |                                  |
| TMTC3               | 0.997                                                                | 0.949                    | 0.958                    |                                  |                                  |
| DCTN2               | 0.997                                                                | 1.038                    | 1.047                    |                                  |                                  |
| SSR4                | 0.997                                                                | 1.035                    | 1.043                    |                                  |                                  |
| OSBPL8              | 0.997                                                                | 0.861                    | 0.883                    |                                  |                                  |
| TEX10               | 0.997                                                                | 0.850                    | 0.875                    |                                  |                                  |
| EPRS                | 0.997                                                                | 0.934                    | 0.944                    |                                  |                                  |
| MYO6                | 0.996                                                                | 1.075                    | 1.090                    |                                  |                                  |
| SSR1                | 0.996                                                                | 0.921                    | 0.933                    |                                  |                                  |
| VDAC1               | 0.996                                                                | 1.058                    | 1.070                    |                                  |                                  |

| Protein name      | Average fold change in chromatin abundance (SILAC ratio UV vs no UV) | Forward L(no UV) / H(UV) | Reverse L(UV) / H(no UV) | Forward Significance B (p ≤0.05) | Reverse Significance B (p ≤0.05) |
|-------------------|----------------------------------------------------------------------|--------------------------|--------------------------|----------------------------------|----------------------------------|
| RPS6              | 0.996                                                                | 1.018                    | 1.026                    |                                  |                                  |
| RAB14             | 0.996                                                                | 1.003                    | 1.011                    |                                  |                                  |
| G6PD              | 0.996                                                                | 0.935                    | 0.946                    |                                  |                                  |
| MT-CO2            | 0.996                                                                | 0.990                    | 0.998                    |                                  |                                  |
| MAP1LC3A          | 0.996                                                                | 1.081                    | 1.098                    |                                  |                                  |
| RPL24             | 0.996                                                                | 1.054                    | 1.067                    |                                  |                                  |
| UBE2V2            | 0.996                                                                | 1.017                    | 1.026                    |                                  |                                  |
| MBNL1;MBLL;MBNL2  | 0.996                                                                | 0.998                    | 1.007                    |                                  |                                  |
| TMEM43            | 0.996                                                                | 0.934                    | 0.946                    |                                  |                                  |
| PGRMC1            | 0.995                                                                | 0.844                    | 0.872                    |                                  |                                  |
| COX5B             | 0.995                                                                | 0.854                    | 0.880                    |                                  |                                  |
| TPP1              | 0.995                                                                | 1.121                    | 1.150                    |                                  |                                  |
| ACP1              | 0.995                                                                | 0.941                    | 0.952                    |                                  |                                  |
| CPNE3             | 0.995                                                                | 0.957                    | 0.967                    |                                  |                                  |
| LMAN2             | 0.995                                                                | 1.003                    | 1.012                    |                                  |                                  |
| PSMD8             | 0.995                                                                | 1.018                    | 1.028                    |                                  |                                  |
| TSPO              | 0.995                                                                | 1.072                    | 1.089                    |                                  |                                  |
| GNAQ              | 0.995                                                                | 0.901                    | 0.918                    |                                  |                                  |
| RPL15             | 0.995                                                                | 1.006                    | 1.016                    |                                  |                                  |
| HNRNPUL1          | 0.995                                                                | 0.997                    | 1.007                    |                                  |                                  |
| GRHPR             | 0.995                                                                | 1.028                    | 1.040                    |                                  |                                  |
| SNRPA             | 0.995                                                                | 1.008                    | 1.019                    |                                  |                                  |
| UFC1              | 0.995                                                                | 1.051                    | 1.065                    |                                  |                                  |
| PC                | 0.995                                                                | 0.789                    | 0.833                    |                                  |                                  |
| NBAS              | 0.995                                                                | 0.949                    | 0.961                    |                                  |                                  |
| RPS2              | 0.994                                                                | 0.989                    | 1.000                    |                                  |                                  |
| NDUFA12           | 0.994                                                                | 1.063                    | 1.081                    |                                  |                                  |
| PSMB7             | 0.994                                                                | 0.894                    | 0.914                    |                                  |                                  |
| GOSR1             | 0.994                                                                | 1.112                    | 1.141                    |                                  |                                  |
| MYL1;MYL3         | 0.994                                                                | 0.995                    | 1.007                    |                                  |                                  |
| SBDS              | 0.994                                                                | 1.040                    | 1.054                    |                                  |                                  |
| UQCRFS1;UQCRFS1P1 | 0.994                                                                | 1.047                    | 1.062                    |                                  |                                  |
| RAP1A             | 0.994                                                                | 1.111                    | 1.140                    |                                  |                                  |
| UACA              | 0.994                                                                | 1.095                    | 1.119                    |                                  |                                  |
| SFXN3             | 0.994                                                                | 0.963                    | 0.975                    |                                  |                                  |
| MYH10             | 0.994                                                                | 0.949                    | 0.962                    |                                  |                                  |
| NDUFAB1           | 0.994                                                                | 0.917                    | 0.934                    |                                  |                                  |
| ARPC5L            | 0.994                                                                | 0.912                    | 0.930                    |                                  |                                  |
| PRKAR2A           | 0.994                                                                | 0.996                    | 1.008                    |                                  |                                  |
| RALB              | 0.994                                                                | 1.033                    | 1.048                    |                                  |                                  |
| TMSB4X;TMSB4XP4   | 0.994                                                                | 0.897                    | 0.917                    |                                  |                                  |
| MCM2              | 0.994                                                                | 1.146                    | 1.189                    |                                  |                                  |
| TOMM20            | 0.994                                                                | 1.065                    | 1.084                    |                                  |                                  |
| AP2A1             | 0.994                                                                | 0.963                    | 0.976                    |                                  |                                  |
| C9orf63           | 0.994                                                                | 0.980                    | 0.993                    |                                  |                                  |
| MBOAT7            | 0.994                                                                | 0.962                    | 0.976                    |                                  |                                  |

| Protein name  | Average fold change in chromatin abundance (SILAC ratio UV vs no UV) | Forward L(no UV) / H(UV) | Reverse L(UV) / H(no UV) | Forward Significance B (p ≤0.05) | Reverse Significance B (p ≤0.05) |
|---------------|----------------------------------------------------------------------|--------------------------|--------------------------|----------------------------------|----------------------------------|
| RNF170        | 0.993                                                                | 0.804                    | 0.845                    |                                  |                                  |
| CCDC127       | 0.993                                                                | 1.021                    | 1.036                    |                                  |                                  |
| STX5          | 0.993                                                                | 1.028                    | 1.043                    |                                  |                                  |
| MRPL14        | 0.993                                                                | 0.960                    | 0.975                    |                                  |                                  |
| SURF4         | 0.993                                                                | 0.869                    | 0.896                    |                                  |                                  |
| RANBP1        | 0.993                                                                | 1.008                    | 1.023                    |                                  |                                  |
| COX6B1        | 0.993                                                                | 0.952                    | 0.967                    |                                  |                                  |
| GARS          | 0.993                                                                | 0.867                    | 0.894                    |                                  |                                  |
| PSMD7         | 0.993                                                                | 0.997                    | 1.012                    |                                  |                                  |
| RRBP1         | 0.993                                                                | 0.984                    | 0.999                    |                                  |                                  |
| SRPRB         | 0.993                                                                | 1.046                    | 1.065                    |                                  |                                  |
| ANP32B        | 0.992                                                                | 0.923                    | 0.942                    |                                  |                                  |
| PSMA5         | 0.992                                                                | 1.037                    | 1.055                    |                                  |                                  |
| COX4I1        | 0.992                                                                | 0.956                    | 0.972                    |                                  |                                  |
| MYL12A;MYL12B | 0.992                                                                | 1.043                    | 1.062                    |                                  |                                  |
| RER1          | 0.992                                                                | 0.873                    | 0.900                    |                                  |                                  |
| CYCS          | 0.992                                                                | 0.985                    | 1.000                    |                                  |                                  |
| SARNP;CIP29   | 0.992                                                                | 1.021                    | 1.038                    |                                  |                                  |
| NDUFB5        | 0.992                                                                | 1.001                    | 1.018                    |                                  |                                  |
| CLIC4         | 0.992                                                                | 1.002                    | 1.018                    |                                  |                                  |
| PPP1R12A      | 0.992                                                                | 1.004                    | 1.021                    |                                  |                                  |
| GOSR2         | 0.992                                                                | 1.003                    | 1.019                    |                                  |                                  |
| FTL           | 0.992                                                                | 1.080                    | 1.107                    |                                  |                                  |
| RPL35         | 0.992                                                                | 1.010                    | 1.027                    |                                  |                                  |
| CKAP4         | 0.992                                                                | 0.949                    | 0.967                    |                                  |                                  |
| HNRNPAB       | 0.992                                                                | 1.010                    | 1.027                    |                                  |                                  |
| CBFB          | 0.992                                                                | 1.007                    | 1.024                    |                                  |                                  |
| RPS24         | 0.991                                                                | 1.009                    | 1.026                    |                                  |                                  |
| SLC25A3       | 0.991                                                                | 0.944                    | 0.963                    |                                  |                                  |
| LAMP2         | 0.991                                                                | 0.967                    | 0.985                    |                                  |                                  |
| CLIC1         | 0.991                                                                | 1.017                    | 1.036                    |                                  |                                  |
| IDH1          | 0.991                                                                | 1.009                    | 1.027                    |                                  |                                  |
| NNT           | 0.991                                                                | 0.962                    | 0.980                    |                                  |                                  |
| UQCRB         | 0.991                                                                | 0.988                    | 1.005                    |                                  |                                  |
| SCP2          | 0.991                                                                | 1.072                    | 1.098                    |                                  |                                  |
| ATP13A1       | 0.991                                                                | 1.000                    | 1.018                    |                                  |                                  |
| RALA          | 0.991                                                                | 1.096                    | 1.129                    |                                  | +                                |
| HMGB1;HMGB1P1 | 0.991                                                                | 0.927                    | 0.948                    |                                  |                                  |
| SNX12         | 0.991                                                                | 0.936                    | 0.956                    |                                  |                                  |
| ATP6V1A       | 0.990                                                                | 1.028                    | 1.050                    |                                  |                                  |
| NDUFB7        | 0.990                                                                | 0.978                    | 0.997                    |                                  |                                  |
| RMND1         | 0.990                                                                | 1.012                    | 1.033                    |                                  |                                  |
| INF2          | 0.990                                                                | 1.077                    | 1.107                    |                                  |                                  |
| S100A10       | 0.990                                                                | 1.024                    | 1.046                    |                                  |                                  |
| RAB6A         | 0.990                                                                | 1.023                    | 1.045                    |                                  |                                  |
| PPP1R9B       | 0.990                                                                | 0.944                    | 0.966                    |                                  |                                  |

| Protein name      | Average fold change in chromatin abundance (SILAC ratio UV vs no UV) | Forward L(no UV) / H(UV) | Reverse L(UV) / H(no UV) | Forward Significance B (p ≤0.05) | Reverse Significance B (p ≤0.05) |
|-------------------|----------------------------------------------------------------------|--------------------------|--------------------------|----------------------------------|----------------------------------|
| MYL6              | 0.990                                                                | 1.014                    | 1.036                    |                                  |                                  |
| RPL21             | 0.990                                                                | 0.940                    | 0.963                    |                                  |                                  |
| ANP32A            | 0.990                                                                | 0.955                    | 0.976                    |                                  |                                  |
| RBPMS             | 0.989                                                                | 1.063                    | 1.092                    |                                  |                                  |
| SUN2              | 0.989                                                                | 1.014                    | 1.037                    |                                  |                                  |
| AP2B1             | 0.989                                                                | 1.006                    | 1.029                    |                                  |                                  |
| BCAP31            | 0.989                                                                | 0.979                    | 1.001                    |                                  |                                  |
| RPN2              | 0.989                                                                | 0.919                    | 0.944                    |                                  |                                  |
| CAPZA2            | 0.989                                                                | 0.957                    | 0.979                    |                                  |                                  |
| ARPC2             | 0.989                                                                | 0.988                    | 1.011                    |                                  |                                  |
| RPL13A            | 0.988                                                                | 0.994                    | 1.017                    |                                  |                                  |
| TMED10            | 0.988                                                                | 1.003                    | 1.027                    |                                  |                                  |
| PSMA4             | 0.988                                                                | 1.020                    | 1.045                    |                                  |                                  |
| EEF1G             | 0.988                                                                | 0.981                    | 1.005                    |                                  |                                  |
| CACNA1A           | 0.988                                                                | 0.927                    | 0.953                    |                                  |                                  |
| COPB1             | 0.988                                                                | 0.894                    | 0.924                    |                                  |                                  |
| SMARCAD1          | 0.988                                                                | 1.020                    | 1.046                    |                                  |                                  |
| OCIAD1            | 0.988                                                                | 1.088                    | 1.126                    |                                  | +                                |
| SNAP29            | 0.988                                                                | 1.037                    | 1.065                    |                                  |                                  |
| CDK5              | 0.988                                                                | 1.096                    | 1.136                    |                                  |                                  |
| PPIH              | 0.988                                                                | 1.007                    | 1.032                    |                                  |                                  |
| PSMD11            | 0.988                                                                | 1.077                    | 1.112                    |                                  |                                  |
| PPP1CA            | 0.988                                                                | 0.946                    | 0.972                    |                                  |                                  |
| IPO5              | 0.988                                                                | 1.033                    | 1.061                    |                                  |                                  |
| EMC8              | 0.988                                                                | 0.931                    | 0.958                    |                                  |                                  |
| DDAH2             | 0.988                                                                | 0.930                    | 0.957                    |                                  |                                  |
| MYH14             | 0.987                                                                | 0.957                    | 0.982                    |                                  |                                  |
| ERLIN1            | 0.987                                                                | 0.925                    | 0.953                    |                                  |                                  |
| TRA2B             | 0.987                                                                | 0.953                    | 0.979                    |                                  |                                  |
| NDUFA9            | 0.987                                                                | 0.994                    | 1.020                    |                                  |                                  |
| UQCRH             | 0.987                                                                | 0.942                    | 0.968                    |                                  |                                  |
| COL5A2            | 0.987                                                                | 0.800                    | 0.852                    |                                  |                                  |
| HEXA              | 0.987                                                                | 1.061                    | 1.095                    |                                  |                                  |
| PSMC3             | 0.987                                                                | 0.922                    | 0.951                    |                                  |                                  |
| DPM1              | 0.987                                                                | 1.008                    | 1.036                    |                                  |                                  |
| PRDX5             | 0.987                                                                | 0.960                    | 0.987                    |                                  |                                  |
| RPL23             | 0.987                                                                | 0.942                    | 0.969                    |                                  |                                  |
| HDGF              | 0.987                                                                | 0.900                    | 0.932                    |                                  |                                  |
| RAD23B            | 0.986                                                                | 0.986                    | 1.013                    |                                  |                                  |
| FAM120A           | 0.986                                                                | 0.916                    | 0.947                    |                                  |                                  |
| HNRNPA3           | 0.986                                                                | 0.955                    | 0.983                    |                                  |                                  |
| CCT3              | 0.986                                                                | 0.951                    | 0.979                    |                                  |                                  |
| RAB27B            | 0.986                                                                | 1.158                    | 1.229                    |                                  |                                  |
| MAP1LC3B;MAP1LC3E | 0.986                                                                | 1.120                    | 1.174                    |                                  |                                  |
| API5              | 0.986                                                                | 0.925                    | 0.956                    |                                  |                                  |
| LACTB             | 0.986                                                                | 0.952                    | 0.981                    |                                  |                                  |



| Protein name    | Average fold change in chromatin abundance (SILAC ratio UV vs no UV) | Forward L(no UV) / H(UV) | Reverse L(UV) / H(no UV) | Forward Significance B (p ≤0.05) | Reverse Significance B (p ≤0.05) |
|-----------------|----------------------------------------------------------------------|--------------------------|--------------------------|----------------------------------|----------------------------------|
| COX5A           | 0.986                                                                | 0.887                    | 0.922                    |                                  |                                  |
| FAM98A          | 0.986                                                                | 1.023                    | 1.054                    |                                  |                                  |
| PSMA2           | 0.985                                                                | 0.974                    | 1.004                    |                                  |                                  |
| VAPA            | 0.985                                                                | 0.884                    | 0.921                    |                                  |                                  |
| XPOT            | 0.985                                                                | 0.889                    | 0.925                    |                                  |                                  |
| ABCF2           | 0.985                                                                | 1.052                    | 1.089                    |                                  |                                  |
| KPNA1           | 0.985                                                                | 0.994                    | 1.025                    |                                  |                                  |
| RPN1            | 0.985                                                                | 0.884                    | 0.921                    |                                  |                                  |
| TCEB2           | 0.985                                                                | 1.001                    | 1.033                    |                                  |                                  |
| IARS            | 0.985                                                                | 0.911                    | 0.945                    |                                  |                                  |
| MYLK            | 0.985                                                                | 1.053                    | 1.092                    |                                  |                                  |
| STMN1           | 0.985                                                                | 1.012                    | 1.044                    |                                  |                                  |
| OSTC            | 0.985                                                                | 0.795                    | 0.852                    |                                  |                                  |
| PHB2            | 0.985                                                                | 1.005                    | 1.037                    |                                  |                                  |
| UQCR10          | 0.984                                                                | 1.068                    | 1.110                    |                                  |                                  |
| ATP5I           | 0.984                                                                | 0.959                    | 0.990                    |                                  |                                  |
| RAB21           | 0.984                                                                | 1.032                    | 1.069                    |                                  |                                  |
| CSTB            | 0.984                                                                | 1.022                    | 1.057                    |                                  |                                  |
| MYO18A          | 0.984                                                                | 1.014                    | 1.048                    |                                  |                                  |
| PRKRA           | 0.984                                                                | 0.920                    | 0.954                    |                                  |                                  |
| PLGRKT          | 0.984                                                                | 1.056                    | 1.097                    |                                  |                                  |
| LPXN            | 0.984                                                                | 1.176                    | 1.264                    | +                                | +                                |
| RPL22           | 0.984                                                                | 0.987                    | 1.020                    |                                  |                                  |
| RPL23A          | 0.984                                                                | 0.937                    | 0.970                    |                                  |                                  |
| COX6A1P2;COX6A1 | 0.984                                                                | 0.764                    | 0.831                    | +                                | +                                |
| PEX14           | 0.984                                                                | 1.029                    | 1.066                    |                                  |                                  |
| UFL1            | 0.983                                                                | 0.950                    | 0.983                    |                                  |                                  |
| C6orf120        | 0.983                                                                | 0.880                    | 0.920                    |                                  |                                  |
| RIN3            | 0.983                                                                | 1.027                    | 1.064                    |                                  |                                  |
| KIAA2013        | 0.983                                                                | 1.028                    | 1.066                    |                                  |                                  |
| RPL17           | 0.983                                                                | 1.024                    | 1.062                    |                                  |                                  |
| VDAC3           | 0.983                                                                | 1.011                    | 1.047                    |                                  |                                  |
| GNG12           | 0.983                                                                | 0.940                    | 0.975                    |                                  |                                  |
| DUT             | 0.983                                                                | 1.060                    | 1.104                    |                                  |                                  |
| UQCRC1          | 0.983                                                                | 1.045                    | 1.087                    |                                  |                                  |
| EIF4B           | 0.983                                                                | 0.850                    | 0.896                    |                                  |                                  |
| RNH1            | 0.983                                                                | 0.970                    | 1.005                    |                                  |                                  |
| RRAS2           | 0.983                                                                | 1.003                    | 1.039                    |                                  |                                  |
| TNKS1BP1        | 0.983                                                                | 0.955                    | 0.990                    |                                  |                                  |
| EFHD2           | 0.983                                                                | 1.006                    | 1.043                    |                                  |                                  |
| LRRC59          | 0.983                                                                | 0.899                    | 0.938                    |                                  |                                  |
| SEC11A;SEC11L1  | 0.982                                                                | 0.946                    | 0.982                    |                                  |                                  |
| RPLP2           | 0.982                                                                | 0.966                    | 1.002                    |                                  |                                  |
| DNAJC7          | 0.982                                                                | 1.048                    | 1.092                    |                                  |                                  |
| LAMTOR3         | 0.982                                                                | 0.747                    | 0.822                    | +                                | +                                |
| SLC12A9         | 0.982                                                                | 0.975                    | 1.012                    |                                  |                                  |

| Protein name | Average fold change in chromatin abundance (SILAC ratio UV vs no UV) | Forward L(no UV) / H(UV) | Reverse L(UV) / H(no UV) | Forward Significance B (p ≤0.05) | Reverse Significance B (p ≤0.05) |
|--------------|----------------------------------------------------------------------|--------------------------|--------------------------|----------------------------------|----------------------------------|
| NSUN2        | 0.981                                                                | 0.971                    | 1.008                    |                                  |                                  |
| TMEM126A     | 0.981                                                                | 0.965                    | 1.002                    |                                  |                                  |
| NDUFS8       | 0.981                                                                | 0.987                    | 1.025                    |                                  |                                  |
| H1FX         | 0.981                                                                | 0.925                    | 0.964                    |                                  |                                  |
| COX6C        | 0.981                                                                | 0.973                    | 1.011                    |                                  |                                  |
| ERLIN2       | 0.981                                                                | 0.979                    | 1.017                    |                                  |                                  |
| RPL26;KRBA2  | 0.981                                                                | 0.949                    | 0.988                    |                                  |                                  |
| HM13         | 0.981                                                                | 0.976                    | 1.015                    |                                  |                                  |
| EMC4         | 0.980                                                                | 0.934                    | 0.974                    |                                  |                                  |
| HIST2H2AB    | 0.980                                                                | 0.968                    | 1.007                    |                                  |                                  |
| ALYREF       | 0.980                                                                | 0.909                    | 0.951                    |                                  |                                  |
| CTSZ         | 0.980                                                                | 1.047                    | 1.095                    |                                  |                                  |
| AP2M1        | 0.980                                                                | 1.019                    | 1.063                    |                                  |                                  |
| CLTB         | 0.980                                                                | 0.947                    | 0.988                    |                                  |                                  |
| MCUR1        | 0.980                                                                | 1.032                    | 1.079                    |                                  |                                  |
| PSMA3        | 0.980                                                                | 1.048                    | 1.098                    |                                  |                                  |
| XRCC5        | 0.979                                                                | 0.993                    | 1.035                    |                                  |                                  |
| COPS8        | 0.979                                                                | 0.936                    | 0.978                    |                                  |                                  |
| BDH2;SLC9B2  | 0.979                                                                | 1.103                    | 1.169                    |                                  |                                  |
| MPC2         | 0.979                                                                | 0.965                    | 1.007                    |                                  |                                  |
| COL12A1      | 0.979                                                                | 0.956                    | 0.998                    |                                  |                                  |
| DECR1        | 0.979                                                                | 0.993                    | 1.036                    |                                  |                                  |
| CEP170       | 0.979                                                                | 0.951                    | 0.993                    |                                  |                                  |
| PAPSS2       | 0.979                                                                | 1.095                    | 1.160                    |                                  |                                  |
| TRIM25       | 0.979                                                                | 0.912                    | 0.957                    |                                  |                                  |
| HNRNPR       | 0.978                                                                | 0.976                    | 1.020                    |                                  |                                  |
| DYNLRB1      | 0.978                                                                | 1.040                    | 1.091                    |                                  |                                  |
| PDLIM2       | 0.978                                                                | 0.906                    | 0.952                    |                                  |                                  |
| RFTN1        | 0.978                                                                | 0.792                    | 0.859                    | +                                |                                  |
| NDUFA1       | 0.978                                                                | 1.011                    | 1.059                    |                                  |                                  |
| RPL11        | 0.978                                                                | 0.949                    | 0.993                    |                                  |                                  |
| UQCRQ        | 0.978                                                                | 0.967                    | 1.012                    |                                  |                                  |
| MYOF         | 0.978                                                                | 0.953                    | 0.997                    |                                  |                                  |
| TUBA4A       | 0.978                                                                | 0.846                    | 0.902                    |                                  |                                  |
| CUL5         | 0.978                                                                | 0.911                    | 0.958                    |                                  |                                  |
| RPL27        | 0.978                                                                | 0.926                    | 0.972                    |                                  |                                  |
| AIMP1        | 0.978                                                                | 0.901                    | 0.949                    |                                  |                                  |
| DNM2         | 0.977                                                                | 1.066                    | 1.126                    |                                  |                                  |
| ATP5J        | 0.977                                                                | 0.820                    | 0.881                    |                                  |                                  |
| SAMM50       | 0.977                                                                | 0.973                    | 1.018                    |                                  |                                  |
| KIAA1715;LNP | 0.977                                                                | 0.835                    | 0.894                    |                                  |                                  |
| LMAN1        | 0.976                                                                | 0.900                    | 0.950                    |                                  |                                  |
| G3BP2        | 0.976                                                                | 0.935                    | 0.983                    |                                  |                                  |
| ARHGEF2      | 0.976                                                                | 0.987                    | 1.036                    |                                  |                                  |
| GNB4         | 0.976                                                                | 0.903                    | 0.953                    |                                  |                                  |
| PSMC5        | 0.976                                                                | 0.949                    | 0.996                    |                                  |                                  |

| Protein name    | Average fold change in chromatin abundance (SILAC ratio UV vs no UV) | Forward L(no UV) / H(UV) | Reverse L(UV) / H(no UV) | Forward Significance B (p ≤0.05) | Reverse Significance B (p ≤0.05) |
|-----------------|----------------------------------------------------------------------|--------------------------|--------------------------|----------------------------------|----------------------------------|
| HRAS;NRAS       | 0.976                                                                | 0.947                    | 0.996                    |                                  |                                  |
| TMED9           | 0.976                                                                | 0.948                    | 0.997                    |                                  |                                  |
| PDCD11          | 0.976                                                                | 0.938                    | 0.987                    |                                  |                                  |
| MAN2A1          | 0.976                                                                | 0.990                    | 1.040                    |                                  |                                  |
| SRP68           | 0.975                                                                | 0.895                    | 0.947                    |                                  |                                  |
| RRP1            | 0.975                                                                | 1.062                    | 1.126                    |                                  |                                  |
| RPL13           | 0.975                                                                | 0.940                    | 0.989                    |                                  |                                  |
| MEST            | 0.975                                                                | 0.942                    | 0.991                    |                                  |                                  |
| MT-ND4          | 0.975                                                                | 0.988                    | 1.039                    |                                  |                                  |
| ACO2            | 0.975                                                                | 0.881                    | 0.935                    |                                  |                                  |
| NDUFA13;YJEFN3  | 0.975                                                                | 0.869                    | 0.925                    |                                  |                                  |
| RPL18A          | 0.975                                                                | 1.035                    | 1.093                    |                                  |                                  |
| C5orf24         | 0.975                                                                | 1.120                    | 1.205                    |                                  |                                  |
| NDUFV2          | 0.975                                                                | 0.919                    | 0.970                    |                                  |                                  |
| UBR5            | 0.975                                                                | 0.853                    | 0.912                    |                                  |                                  |
| STX7            | 0.974                                                                | 0.944                    | 0.995                    |                                  |                                  |
| PDCD10          | 0.974                                                                | 0.859                    | 0.918                    |                                  |                                  |
| SPCS3           | 0.974                                                                | 0.948                    | 1.000                    |                                  |                                  |
| NDUFS5          | 0.974                                                                | 0.916                    | 0.969                    |                                  |                                  |
| NDUFA6          | 0.974                                                                | 1.093                    | 1.169                    |                                  | +                                |
| KHSRP           | 0.974                                                                | 0.883                    | 0.939                    |                                  |                                  |
| PHB             | 0.974                                                                | 0.976                    | 1.029                    |                                  |                                  |
| TOP2A           | 0.974                                                                | 1.158                    | 1.267                    |                                  | +                                |
| HMG20A          | 0.974                                                                | 1.038                    | 1.100                    |                                  |                                  |
| U2AF2           | 0.974                                                                | 0.932                    | 0.985                    |                                  |                                  |
| CEBPZ           | 0.974                                                                | 1.083                    | 1.157                    |                                  |                                  |
| RAB35           | 0.973                                                                | 1.028                    | 1.088                    |                                  |                                  |
| PSMC2           | 0.973                                                                | 1.045                    | 1.109                    |                                  |                                  |
| SLTM            | 0.973                                                                | 0.978                    | 1.032                    |                                  |                                  |
| TMED1           | 0.973                                                                | 0.938                    | 0.992                    |                                  |                                  |
| UQCRC2          | 0.973                                                                | 1.018                    | 1.078                    |                                  |                                  |
| EMC2            | 0.973                                                                | 0.937                    | 0.991                    |                                  |                                  |
| SLC16A7         | 0.973                                                                | 0.748                    | 0.835                    |                                  |                                  |
| CD99            | 0.973                                                                | 0.903                    | 0.959                    |                                  |                                  |
| NUMA1           | 0.973                                                                | 1.060                    | 1.130                    |                                  | +                                |
| KDELRL1;KDELRL2 | 0.972                                                                | 0.934                    | 0.990                    |                                  |                                  |
| SOAT1           | 0.972                                                                | 1.073                    | 1.147                    |                                  |                                  |
| LAMP1           | 0.972                                                                | 1.126                    | 1.222                    |                                  | +                                |
| PSMB6           | 0.972                                                                | 0.927                    | 0.983                    |                                  |                                  |
| SERBP1          | 0.972                                                                | 0.946                    | 1.003                    |                                  |                                  |
| FKBP11          | 0.971                                                                | 0.860                    | 0.923                    |                                  |                                  |
| PRKACA;PRKACB   | 0.971                                                                | 1.008                    | 1.070                    |                                  |                                  |
| RPL14           | 0.971                                                                | 0.968                    | 1.027                    |                                  |                                  |
| SRP14           | 0.971                                                                | 1.077                    | 1.155                    |                                  | +                                |
| MVP             | 0.971                                                                | 0.930                    | 0.988                    |                                  |                                  |
| RPL28           | 0.971                                                                | 1.010                    | 1.074                    |                                  |                                  |

| Protein name        | Average fold change in chromatin abundance (SILAC ratio UV vs no UV) | Forward L(no UV) / H(UV) | Reverse L(UV) / H(no UV) | Forward Significance B (p ≤0.05) | Reverse Significance B (p ≤0.05) |
|---------------------|----------------------------------------------------------------------|--------------------------|--------------------------|----------------------------------|----------------------------------|
| PSMD9               | 0.971                                                                | 0.844                    | 0.912                    |                                  |                                  |
| TMED7;TIRAP3        | 0.970                                                                | 0.984                    | 1.045                    |                                  |                                  |
| SERPINB2            | 0.970                                                                | 1.127                    | 1.229                    |                                  | +                                |
| VAPB                | 0.970                                                                | 0.911                    | 0.971                    |                                  |                                  |
| MGST1               | 0.970                                                                | 0.825                    | 0.896                    |                                  |                                  |
| TNPO1               | 0.970                                                                | 0.986                    | 1.048                    |                                  |                                  |
| MRC2                | 0.970                                                                | 0.984                    | 1.046                    |                                  |                                  |
| MAGT1               | 0.970                                                                | 0.953                    | 1.014                    |                                  |                                  |
| RPRD1B              | 0.970                                                                | 1.017                    | 1.084                    |                                  |                                  |
| CCT5                | 0.970                                                                | 0.975                    | 1.037                    |                                  |                                  |
| FNDC3B              | 0.970                                                                | 1.008                    | 1.074                    |                                  |                                  |
| RPL32               | 0.970                                                                | 0.943                    | 1.003                    |                                  |                                  |
| EIF4E               | 0.970                                                                | 1.005                    | 1.070                    |                                  |                                  |
| H6PD                | 0.969                                                                | 1.006                    | 1.072                    |                                  |                                  |
| SLIRP               | 0.969                                                                | 1.047                    | 1.121                    |                                  |                                  |
| RAN                 | 0.969                                                                | 0.868                    | 0.935                    |                                  |                                  |
| SYNE2               | 0.969                                                                | 1.014                    | 1.082                    |                                  |                                  |
| SLC39A7             | 0.969                                                                | 0.695                    | 0.805                    | +                                | +                                |
| ZNF148              | 0.969                                                                | 1.125                    | 1.230                    |                                  |                                  |
| LAMTOR5             | 0.969                                                                | 1.033                    | 1.106                    |                                  |                                  |
| VAMP5               | 0.968                                                                | 1.039                    | 1.114                    |                                  |                                  |
| PPP1CC              | 0.967                                                                | 0.988                    | 1.056                    |                                  |                                  |
| TRAM1               | 0.967                                                                | 0.937                    | 1.002                    |                                  |                                  |
| YWHAG               | 0.967                                                                | 0.905                    | 0.971                    |                                  |                                  |
| DDOST               | 0.967                                                                | 0.891                    | 0.959                    |                                  |                                  |
| TMED2               | 0.967                                                                | 0.937                    | 1.003                    |                                  |                                  |
| SLC25A24            | 0.967                                                                | 0.980                    | 1.049                    |                                  |                                  |
| FARP1               | 0.967                                                                | 0.694                    | 0.807                    | +                                | +                                |
| LMNB2               | 0.967                                                                | 0.910                    | 0.978                    |                                  |                                  |
| B2M                 | 0.966                                                                | 1.065                    | 1.153                    |                                  | +                                |
| STT3A               | 0.966                                                                | 0.880                    | 0.950                    |                                  |                                  |
| RPL10A              | 0.966                                                                | 0.935                    | 1.003                    |                                  |                                  |
| PDLIM7              | 0.966                                                                | 0.896                    | 0.965                    |                                  |                                  |
| GREM1               | 0.966                                                                | 0.829                    | 0.907                    |                                  |                                  |
| SNX18               | 0.966                                                                | 0.680                    | 0.799                    | +                                | +                                |
| RPL37A              | 0.966                                                                | 0.991                    | 1.064                    |                                  |                                  |
| INTS1;DKFZP586J0619 | 0.965                                                                | 1.067                    | 1.157                    |                                  |                                  |
| PFDN4               | 0.965                                                                | 1.035                    | 1.116                    |                                  |                                  |
| PCOLCE              | 0.965                                                                | 1.057                    | 1.144                    |                                  |                                  |
| PNO1                | 0.965                                                                | 0.997                    | 1.071                    |                                  |                                  |
| NDUFV1              | 0.965                                                                | 0.979                    | 1.052                    |                                  |                                  |
| RPL36               | 0.965                                                                | 0.903                    | 0.973                    |                                  |                                  |
| REEP5               | 0.965                                                                | 1.062                    | 1.153                    |                                  |                                  |
| SLC25A20            | 0.964                                                                | 1.002                    | 1.079                    |                                  |                                  |
| TMOD2               | 0.964                                                                | 0.991                    | 1.067                    |                                  |                                  |
| GNAS                | 0.964                                                                | 0.970                    | 1.044                    |                                  |                                  |

| Protein name       | Average fold change in chromatin abundance (SILAC ratio UV vs no UV) | Forward L(no UV) / H(UV) | Reverse L(UV) / H(no UV) | Forward Significance B (p ≤0.05) | Reverse Significance B (p ≤0.05) |
|--------------------|----------------------------------------------------------------------|--------------------------|--------------------------|----------------------------------|----------------------------------|
| EMC7               | 0.964                                                                | 1.015                    | 1.095                    |                                  |                                  |
| S100A16            | 0.964                                                                | 0.982                    | 1.057                    |                                  |                                  |
| MYO1B              | 0.964                                                                | 0.967                    | 1.041                    |                                  |                                  |
| EMC10              | 0.964                                                                | 0.996                    | 1.074                    |                                  |                                  |
| EIF2S2             | 0.964                                                                | 0.992                    | 1.069                    |                                  |                                  |
| EBP                | 0.964                                                                | 0.952                    | 1.026                    |                                  |                                  |
| RPL18              | 0.964                                                                | 0.925                    | 0.998                    |                                  |                                  |
| RPL5               | 0.963                                                                | 0.982                    | 1.059                    |                                  |                                  |
| TOMM22             | 0.963                                                                | 0.847                    | 0.926                    |                                  |                                  |
| GPNMB              | 0.963                                                                | 0.986                    | 1.064                    |                                  |                                  |
| RPL12              | 0.963                                                                | 0.966                    | 1.041                    |                                  |                                  |
| IPO7               | 0.963                                                                | 0.978                    | 1.056                    |                                  |                                  |
| LMNB1              | 0.963                                                                | 0.912                    | 0.987                    |                                  |                                  |
| ITGB6              | 0.962                                                                | 1.180                    | 1.344                    | +                                | +                                |
| PGAM5              | 0.962                                                                | 0.951                    | 1.027                    |                                  |                                  |
| LIMA1              | 0.962                                                                | 0.871                    | 0.950                    |                                  |                                  |
| RPL7               | 0.962                                                                | 0.915                    | 0.991                    |                                  |                                  |
| LAMTOR2            | 0.962                                                                | 0.998                    | 1.080                    |                                  |                                  |
| ATP6V1E1;ATP6V1E2  | 0.962                                                                | 1.023                    | 1.111                    |                                  |                                  |
| CCT6A              | 0.961                                                                | 0.954                    | 1.032                    |                                  |                                  |
| TXN                | 0.961                                                                | 1.001                    | 1.086                    |                                  |                                  |
| ADA                | 0.961                                                                | 1.116                    | 1.242                    |                                  |                                  |
| YME1L1             | 0.961                                                                | 1.061                    | 1.162                    |                                  |                                  |
| LAMTOR1            | 0.961                                                                | 0.933                    | 1.012                    |                                  |                                  |
| SDCBP              | 0.961                                                                | 1.047                    | 1.143                    |                                  |                                  |
| TP53BP1            | 0.960                                                                | 0.910                    | 0.989                    |                                  |                                  |
| EIF2S3;EIF2S3L     | 0.960                                                                | 0.880                    | 0.960                    |                                  |                                  |
| TUBA1A;TUBA3C;TUB. | 0.960                                                                | 1.043                    | 1.140                    |                                  |                                  |
| SPCS2              | 0.960                                                                | 0.890                    | 0.971                    |                                  |                                  |
| UBE2I              | 0.960                                                                | 0.900                    | 0.980                    |                                  |                                  |
| SART1              | 0.960                                                                | 1.015                    | 1.105                    |                                  |                                  |
| APRT               | 0.960                                                                | 0.978                    | 1.062                    |                                  |                                  |
| CSNK2A1;CSNK2A3    | 0.960                                                                | 0.927                    | 1.008                    |                                  |                                  |
| PTBP1              | 0.960                                                                | 0.928                    | 1.009                    |                                  |                                  |
| FTSJ3              | 0.959                                                                | 0.935                    | 1.016                    |                                  |                                  |
| PSMB5              | 0.959                                                                | 0.927                    | 1.009                    |                                  |                                  |
| GTPBP4             | 0.959                                                                | 0.953                    | 1.036                    |                                  |                                  |
| FUBP3              | 0.959                                                                | 0.925                    | 1.007                    |                                  |                                  |
| DDX5               | 0.959                                                                | 1.047                    | 1.149                    |                                  | +                                |
| MCM7               | 0.959                                                                | 1.072                    | 1.182                    |                                  |                                  |
| ATP6V1G1           | 0.958                                                                | 1.050                    | 1.154                    |                                  |                                  |
| FAM129A            | 0.958                                                                | 1.117                    | 1.251                    |                                  | +                                |
| RAB22A             | 0.958                                                                | 1.004                    | 1.096                    |                                  |                                  |
| ILF3               | 0.958                                                                | 0.889                    | 0.973                    |                                  |                                  |
| PSMA7;PSMA8        | 0.958                                                                | 0.922                    | 1.006                    |                                  |                                  |
| SKP1               | 0.958                                                                | 1.008                    | 1.100                    |                                  |                                  |

| Protein name       | Average fold change in chromatin abundance (SILAC ratio UV vs no UV) | Forward L(no UV) / H(UV) | Reverse L(UV) / H(no UV) | Forward Significance B (p ≤0.05) | Reverse Significance B (p ≤0.05) |
|--------------------|----------------------------------------------------------------------|--------------------------|--------------------------|----------------------------------|----------------------------------|
| AHCTF1             | 0.958                                                                | 1.062                    | 1.171                    |                                  |                                  |
| KTN1               | 0.958                                                                | 0.939                    | 1.024                    |                                  |                                  |
| MRPL17             | 0.958                                                                | 0.886                    | 0.971                    |                                  |                                  |
| FAM3C              | 0.958                                                                | 1.162                    | 1.328                    | +                                | +                                |
| DDT;DDTL           | 0.957                                                                | 0.889                    | 0.975                    |                                  |                                  |
| CD63               | 0.957                                                                | 1.002                    | 1.096                    |                                  | +                                |
| HIST2H2BD;HIST2H2B | 0.957                                                                | 0.988                    | 1.081                    |                                  |                                  |
| SNAP23             | 0.956                                                                | 1.024                    | 1.125                    |                                  |                                  |
| SCAMP3             | 0.956                                                                | 0.991                    | 1.086                    |                                  |                                  |
| DYNC1I2            | 0.956                                                                | 0.914                    | 1.002                    |                                  |                                  |
| UGP2               | 0.956                                                                | 0.952                    | 1.042                    |                                  |                                  |
| DDX17              | 0.956                                                                | 1.003                    | 1.101                    |                                  | +                                |
| KRTCAP2            | 0.955                                                                | 0.847                    | 0.941                    |                                  |                                  |
| LAMTOR4            | 0.955                                                                | 1.057                    | 1.173                    |                                  | +                                |
| U2AF1              | 0.955                                                                | 0.850                    | 0.944                    |                                  |                                  |
| BAG2               | 0.954                                                                | 0.842                    | 0.938                    |                                  |                                  |
| GNAI2              | 0.954                                                                | 1.000                    | 1.101                    |                                  | +                                |
| TOP2B              | 0.954                                                                | 1.071                    | 1.194                    |                                  | +                                |
| RRAS               | 0.954                                                                | 0.944                    | 1.037                    |                                  |                                  |
| LOX                | 0.953                                                                | 1.083                    | 1.214                    |                                  |                                  |
| CCT8               | 0.953                                                                | 0.983                    | 1.083                    |                                  |                                  |
| MYCBP              | 0.953                                                                | 0.839                    | 0.937                    |                                  |                                  |
| PPP1R18            | 0.953                                                                | 0.877                    | 0.972                    |                                  |                                  |
| HSPA6;HSPA7        | 0.953                                                                | 0.920                    | 1.014                    |                                  |                                  |
| MTX2               | 0.953                                                                | 0.967                    | 1.066                    |                                  |                                  |
| TM9SF4             | 0.952                                                                | 0.982                    | 1.083                    |                                  |                                  |
| HDAC1;HDAC2        | 0.952                                                                | 1.040                    | 1.157                    |                                  |                                  |
| CHD2;CHD1          | 0.952                                                                | 0.979                    | 1.081                    |                                  |                                  |
| DYNLL1             | 0.952                                                                | 0.987                    | 1.090                    |                                  |                                  |
| CTNNA1             | 0.952                                                                | 1.000                    | 1.107                    |                                  |                                  |
| EIF6               | 0.952                                                                | 0.910                    | 1.007                    |                                  |                                  |
| VAMP2;VAMP3        | 0.951                                                                | 0.994                    | 1.100                    |                                  |                                  |
| ITGA4              | 0.951                                                                | 1.022                    | 1.135                    |                                  |                                  |
| GPR107             | 0.951                                                                | 0.972                    | 1.075                    |                                  |                                  |
| STIM1              | 0.951                                                                | 1.000                    | 1.109                    |                                  |                                  |
| GOLGB1             | 0.950                                                                | 1.004                    | 1.116                    |                                  |                                  |
| CD81               | 0.950                                                                | 0.996                    | 1.106                    |                                  |                                  |
| COTL1              | 0.950                                                                | 1.034                    | 1.154                    |                                  |                                  |
| POR                | 0.950                                                                | 1.004                    | 1.116                    |                                  |                                  |
| LRRN4CL            | 0.950                                                                | 0.828                    | 0.933                    |                                  |                                  |
| CAD                | 0.950                                                                | 0.966                    | 1.071                    |                                  |                                  |
| STT3B              | 0.950                                                                | 0.896                    | 0.996                    |                                  |                                  |
| CHCHD2;CHCHD2P9    | 0.949                                                                | 0.981                    | 1.089                    |                                  |                                  |
| EHD2               | 0.949                                                                | 1.041                    | 1.167                    |                                  | +                                |
| FAF2               | 0.949                                                                | 0.926                    | 1.028                    |                                  |                                  |
| SEC61A1;SEC61A2    | 0.949                                                                | 0.843                    | 0.948                    |                                  |                                  |

| Protein name       | Average fold change in chromatin abundance (SILAC ratio UV vs no UV) | Forward L(no UV) / H(UV) | Reverse L(UV) / H(no UV) | Forward Significance B (p ≤0.05) | Reverse Significance B (p ≤0.05) |
|--------------------|----------------------------------------------------------------------|--------------------------|--------------------------|----------------------------------|----------------------------------|
| RPL7A              | 0.949                                                                | 0.906                    | 1.009                    |                                  |                                  |
| NDUFS6             | 0.949                                                                | 1.046                    | 1.176                    |                                  | +                                |
| STX4               | 0.948                                                                | 0.902                    | 1.005                    |                                  |                                  |
| TPM1               | 0.948                                                                | 0.935                    | 1.040                    |                                  |                                  |
| CLDN11             | 0.948                                                                | 1.052                    | 1.186                    |                                  |                                  |
| NDUFB4             | 0.948                                                                | 0.726                    | 0.855                    | +                                | +                                |
| TMCO1              | 0.947                                                                | 0.985                    | 1.100                    |                                  |                                  |
| SNRNP70            | 0.947                                                                | 1.001                    | 1.119                    |                                  |                                  |
| PLCD3              | 0.947                                                                | 0.917                    | 1.024                    |                                  |                                  |
| TJP1               | 0.946                                                                | 0.904                    | 1.012                    |                                  |                                  |
| STX8               | 0.945                                                                | 1.018                    | 1.146                    |                                  |                                  |
| HEATR1             | 0.945                                                                | 0.945                    | 1.057                    |                                  |                                  |
| ILF2               | 0.945                                                                | 0.933                    | 1.045                    |                                  |                                  |
| SSFA2              | 0.945                                                                | 1.018                    | 1.147                    |                                  |                                  |
| GADD45GIP1         | 0.944                                                                | 0.804                    | 0.922                    |                                  |                                  |
| RBMX;RBMXL1        | 0.944                                                                | 0.898                    | 1.010                    |                                  |                                  |
| SSBP1              | 0.944                                                                | 1.011                    | 1.140                    |                                  | +                                |
| MAP7D1             | 0.943                                                                | 0.933                    | 1.049                    |                                  |                                  |
| MOXD1              | 0.943                                                                | 0.962                    | 1.082                    |                                  |                                  |
| HSD17B12           | 0.943                                                                | 0.910                    | 1.025                    |                                  |                                  |
| NOP56              | 0.943                                                                | 0.890                    | 1.005                    |                                  |                                  |
| ELAVL1             | 0.942                                                                | 0.933                    | 1.051                    |                                  |                                  |
| NPM1               | 0.942                                                                | 0.852                    | 0.970                    |                                  |                                  |
| SLC12A4            | 0.941                                                                | 0.968                    | 1.094                    |                                  |                                  |
| SLC3A2             | 0.941                                                                | 0.796                    | 0.921                    | +                                |                                  |
| CLTC               | 0.941                                                                | 0.891                    | 1.009                    |                                  |                                  |
| THY1               | 0.941                                                                | 0.909                    | 1.028                    |                                  |                                  |
| CTNND1             | 0.940                                                                | 0.859                    | 0.978                    |                                  |                                  |
| HDGFRP3            | 0.940                                                                | 0.788                    | 0.915                    |                                  |                                  |
| CLTA               | 0.940                                                                | 0.919                    | 1.041                    |                                  |                                  |
| STX12              | 0.939                                                                | 1.010                    | 1.152                    |                                  |                                  |
| PRAF2              | 0.939                                                                | 0.949                    | 1.077                    |                                  |                                  |
| FAP                | 0.939                                                                | 1.003                    | 1.144                    |                                  |                                  |
| ITGB1              | 0.938                                                                | 0.992                    | 1.131                    |                                  | +                                |
| AIDA               | 0.938                                                                | 0.891                    | 1.016                    |                                  |                                  |
| MAP9               | 0.937                                                                | 0.981                    | 1.121                    |                                  |                                  |
| PEX11B             | 0.937                                                                | 1.002                    | 1.148                    |                                  |                                  |
| PSMD10             | 0.936                                                                | 0.978                    | 1.118                    |                                  |                                  |
| NDUFA5;DKFZp781K13 | 0.936                                                                | 0.982                    | 1.122                    |                                  |                                  |
| VAMP3              | 0.936                                                                | 0.939                    | 1.071                    |                                  |                                  |
| SLC1A5             | 0.936                                                                | 0.822                    | 0.952                    |                                  |                                  |
| NOP58              | 0.936                                                                | 0.885                    | 1.014                    |                                  |                                  |
| GNA13              | 0.935                                                                | 0.950                    | 1.086                    |                                  |                                  |
| SEC13              | 0.935                                                                | 1.052                    | 1.222                    |                                  | +                                |
| TIMM13             | 0.935                                                                | 0.929                    | 1.062                    |                                  |                                  |
| TMEM55B            | 0.935                                                                | 0.716                    | 0.867                    | +                                |                                  |

| Protein name | Average fold change in chromatin abundance (SILAC ratio UV vs no UV) | Forward L(no UV) / H(UV) | Reverse L(UV) / H(no UV) | Forward Significance B (p ≤0.05) | Reverse Significance B (p ≤0.05) |
|--------------|----------------------------------------------------------------------|--------------------------|--------------------------|----------------------------------|----------------------------------|
| ERH          | 0.934                                                                | 0.935                    | 1.071                    |                                  |                                  |
| PDGFRB       | 0.934                                                                | 0.977                    | 1.122                    |                                  |                                  |
| C12orf23     | 0.934                                                                | 0.981                    | 1.128                    |                                  |                                  |
| CRTAP        | 0.934                                                                | 0.973                    | 1.119                    |                                  |                                  |
| MLLT4        | 0.933                                                                | 0.864                    | 0.997                    |                                  |                                  |
| PTGES3       | 0.933                                                                | 0.924                    | 1.061                    |                                  |                                  |
| CSPG4        | 0.933                                                                | 1.081                    | 1.273                    |                                  |                                  |
| FBLL1        | 0.933                                                                | 0.759                    | 0.904                    | +                                |                                  |
| PSMD13       | 0.933                                                                | 0.989                    | 1.141                    |                                  |                                  |
| GALNT2       | 0.932                                                                | 1.005                    | 1.163                    |                                  |                                  |
| DHX9         | 0.932                                                                | 0.867                    | 1.002                    |                                  |                                  |
| NOC2L        | 0.932                                                                | 0.787                    | 0.928                    |                                  |                                  |
| PRNP         | 0.931                                                                | 0.905                    | 1.043                    |                                  |                                  |
| NOP10        | 0.931                                                                | 0.749                    | 0.898                    | +                                |                                  |
| SLC39A9      | 0.930                                                                | 1.064                    | 1.255                    |                                  |                                  |
| VTI1B        | 0.930                                                                | 1.000                    | 1.162                    |                                  |                                  |
| DNTTIP2      | 0.930                                                                | 0.990                    | 1.149                    |                                  |                                  |
| RBM4;RBM4B   | 0.930                                                                | 0.982                    | 1.138                    |                                  |                                  |
| TMED4        | 0.930                                                                | 0.929                    | 1.075                    |                                  |                                  |
| RBM14        | 0.930                                                                | 0.800                    | 0.944                    |                                  |                                  |
| HLA-A        | 0.929                                                                | 0.993                    | 1.155                    |                                  |                                  |
| DKC1         | 0.929                                                                | 0.829                    | 0.972                    |                                  |                                  |
| PSMB4        | 0.929                                                                | 0.952                    | 1.104                    |                                  |                                  |
| SEC61B       | 0.928                                                                | 0.859                    | 1.003                    |                                  |                                  |
| FBL          | 0.928                                                                | 0.776                    | 0.926                    | +                                |                                  |
| NSA2         | 0.928                                                                | 0.995                    | 1.163                    |                                  |                                  |
| TM9SF3       | 0.927                                                                | 1.020                    | 1.198                    |                                  |                                  |
| PPP3R1       | 0.927                                                                | 1.102                    | 1.329                    |                                  | +                                |
| AHNAK        | 0.927                                                                | 0.966                    | 1.127                    |                                  | +                                |
| CCDC47       | 0.926                                                                | 0.943                    | 1.099                    |                                  |                                  |
| DPP4         | 0.926                                                                | 1.146                    | 1.418                    |                                  | +                                |
| NCSTN        | 0.925                                                                | 0.919                    | 1.074                    |                                  |                                  |
| COL3A1       | 0.925                                                                | 0.879                    | 1.030                    |                                  |                                  |
| NPC1         | 0.925                                                                | 0.859                    | 1.010                    |                                  |                                  |
| CCT2         | 0.925                                                                | 0.931                    | 1.089                    |                                  |                                  |
| MAK16        | 0.924                                                                | 0.949                    | 1.111                    |                                  |                                  |
| GBE1         | 0.924                                                                | 0.847                    | 0.998                    |                                  |                                  |
| POLR2M;GCOM1 | 0.924                                                                | 0.598                    | 0.800                    | +                                | +                                |
| SUMO1        | 0.924                                                                | 0.958                    | 1.124                    |                                  |                                  |
| EPB41L2      | 0.923                                                                | 0.868                    | 1.022                    |                                  |                                  |
| RAP2B        | 0.923                                                                | 0.964                    | 1.134                    |                                  |                                  |
| SON          | 0.922                                                                | 0.991                    | 1.173                    |                                  |                                  |
| NHP2         | 0.922                                                                | 0.708                    | 0.880                    | +                                |                                  |
| JAG1         | 0.922                                                                | 0.864                    | 1.021                    |                                  |                                  |
| SCARB2       | 0.922                                                                | 0.870                    | 1.027                    |                                  |                                  |
| SYPL1        | 0.921                                                                | 0.850                    | 1.008                    |                                  |                                  |



| Protein name         | Average fold change in chromatin abundance (SILAC ratio UV vs no UV) | Forward L(no UV) / H(UV) | Reverse L(UV) / H(no UV) | Forward Significance B (p ≤0.05) | Reverse Significance B (p ≤0.05) |
|----------------------|----------------------------------------------------------------------|--------------------------|--------------------------|----------------------------------|----------------------------------|
| SEC62                | 0.921                                                                | 0.967                    | 1.142                    |                                  |                                  |
| NDUFA8               | 0.921                                                                | 0.657                    | 0.844                    | +                                | +                                |
| GLYR1                | 0.921                                                                | 0.960                    | 1.134                    |                                  |                                  |
| ITGAV                | 0.921                                                                | 0.910                    | 1.075                    |                                  |                                  |
| ITGB5                | 0.920                                                                | 0.908                    | 1.072                    |                                  |                                  |
| HLA-A                | 0.920                                                                | 1.021                    | 1.221                    |                                  | +                                |
| GALK1                | 0.920                                                                | 0.761                    | 0.927                    | +                                |                                  |
| HNRNPUL2;hCG_2044    | 0.920                                                                | 0.894                    | 1.058                    |                                  |                                  |
| CD59                 | 0.920                                                                | 0.970                    | 1.150                    |                                  | +                                |
| HLA-B                | 0.920                                                                | 1.035                    | 1.243                    |                                  | +                                |
| BSG                  | 0.919                                                                | 0.841                    | 1.003                    |                                  |                                  |
| CD47                 | 0.919                                                                | 1.014                    | 1.212                    |                                  |                                  |
| FAS                  | 0.919                                                                | 1.015                    | 1.216                    |                                  |                                  |
| NUP107               | 0.919                                                                | 0.802                    | 0.966                    |                                  |                                  |
| FLOT2                | 0.918                                                                | 0.894                    | 1.061                    |                                  |                                  |
| LMO7                 | 0.918                                                                | 1.003                    | 1.201                    |                                  | +                                |
| LIN7C                | 0.918                                                                | 0.911                    | 1.082                    |                                  |                                  |
| MAN2C1               | 0.917                                                                | 0.774                    | 0.943                    | +                                |                                  |
| MACROD1              | 0.917                                                                | 0.926                    | 1.102                    |                                  |                                  |
| DLG1                 | 0.916                                                                | 0.893                    | 1.064                    |                                  |                                  |
| FSTL1                | 0.916                                                                | 0.986                    | 1.182                    |                                  |                                  |
| RPL34                | 0.916                                                                | 1.045                    | 1.270                    |                                  |                                  |
| HMG1                 | 0.916                                                                | 0.873                    | 1.044                    |                                  |                                  |
| RUVBL1               | 0.916                                                                | 0.874                    | 1.045                    |                                  |                                  |
| SPPL2A               | 0.915                                                                | 0.977                    | 1.170                    |                                  |                                  |
| DDX21                | 0.915                                                                | 0.933                    | 1.114                    |                                  |                                  |
| MYADM                | 0.915                                                                | 0.715                    | 0.896                    | +                                |                                  |
| AHNAK2               | 0.914                                                                | 1.023                    | 1.242                    |                                  | +                                |
| IFITM2;IFITM3;IFITM1 | 0.913                                                                | 0.913                    | 1.095                    |                                  |                                  |
| CHP1                 | 0.913                                                                | 0.908                    | 1.090                    |                                  |                                  |
| OCC1;C12orf75        | 0.913                                                                | 0.937                    | 1.126                    |                                  |                                  |
| BLVRA                | 0.912                                                                | 0.874                    | 1.051                    |                                  |                                  |
| ADAR                 | 0.912                                                                | 0.953                    | 1.148                    |                                  |                                  |
| DSE                  | 0.912                                                                | 0.903                    | 1.087                    |                                  |                                  |
| CBX3                 | 0.912                                                                | 0.896                    | 1.079                    |                                  |                                  |
| HLA-C;HLA-B          | 0.912                                                                | 0.992                    | 1.203                    |                                  | +                                |
| CYBRD1               | 0.910                                                                | 0.894                    | 1.079                    |                                  |                                  |
| NT5E                 | 0.910                                                                | 0.954                    | 1.155                    |                                  | +                                |
| FLOT1                | 0.909                                                                | 0.906                    | 1.096                    |                                  |                                  |
| CDKN2A;CDKN2B        | 0.909                                                                | 1.036                    | 1.279                    |                                  |                                  |
| CACNA2D1             | 0.909                                                                | 0.901                    | 1.091                    |                                  |                                  |
| ANPEP                | 0.908                                                                | 0.855                    | 1.040                    |                                  |                                  |
| DNAJC13              | 0.908                                                                | 0.813                    | 0.997                    |                                  |                                  |
| TFRC                 | 0.908                                                                | 0.858                    | 1.044                    |                                  |                                  |
| NPTN;DKFZp566H1924   | 0.907                                                                | 0.904                    | 1.099                    |                                  |                                  |
| DDR2                 | 0.907                                                                | 0.892                    | 1.086                    |                                  |                                  |

| Protein name      | Average fold change in chromatin abundance (SILAC ratio UV vs no UV) | Forward L(no UV) / H(UV) | Reverse L(UV) / H(no UV) | Forward Significance B (p ≤0.05) | Reverse Significance B (p ≤0.05) |
|-------------------|----------------------------------------------------------------------|--------------------------|--------------------------|----------------------------------|----------------------------------|
| LMNA              | 0.907                                                                | 0.803                    | 0.990                    | +                                |                                  |
| LARP1             | 0.907                                                                | 0.935                    | 1.138                    |                                  |                                  |
| TCIRG1            | 0.906                                                                | 0.896                    | 1.091                    |                                  |                                  |
| SAP18             | 0.906                                                                | 1.012                    | 1.249                    |                                  | +                                |
| PTK7              | 0.905                                                                | 0.854                    | 1.045                    |                                  |                                  |
| STOM              | 0.904                                                                | 0.961                    | 1.180                    |                                  | +                                |
| ATP2B4            | 0.904                                                                | 0.924                    | 1.130                    |                                  |                                  |
| COL1A2            | 0.904                                                                | 0.741                    | 0.937                    | +                                |                                  |
| PCDHGA3;PCDHGB5;F | 0.904                                                                | 0.960                    | 1.179                    |                                  |                                  |
| AATF              | 0.904                                                                | 0.950                    | 1.167                    |                                  |                                  |
| GNA11             | 0.903                                                                | 0.850                    | 1.045                    |                                  |                                  |
| HNRNPF            | 0.903                                                                | 0.895                    | 1.097                    |                                  | +                                |
| COL1A1            | 0.903                                                                | 0.747                    | 0.944                    | +                                |                                  |
| UTP14A            | 0.903                                                                | 0.925                    | 1.136                    |                                  |                                  |
| ATP6V0A1          | 0.903                                                                | 0.951                    | 1.170                    |                                  |                                  |
| CDIPT             | 0.902                                                                | 0.941                    | 1.159                    |                                  |                                  |
| UTP11L            | 0.902                                                                | 0.967                    | 1.195                    |                                  |                                  |
| NUP153            | 0.901                                                                | 0.904                    | 1.113                    |                                  |                                  |
| SLC16A3           | 0.901                                                                | 0.877                    | 1.082                    |                                  |                                  |
| RND3;ARHE         | 0.901                                                                | 1.035                    | 1.304                    |                                  | +                                |
| HNRNPU            | 0.901                                                                | 0.898                    | 1.107                    |                                  | +                                |
| ATP1A1            | 0.900                                                                | 0.871                    | 1.076                    |                                  |                                  |
| PLP2              | 0.900                                                                | 0.871                    | 1.077                    |                                  |                                  |
| IMP3              | 0.899                                                                | 1.012                    | 1.272                    |                                  | +                                |
| MPHOSPH10         | 0.898                                                                | 0.883                    | 1.095                    |                                  |                                  |
| POLR2C            | 0.896                                                                | 0.877                    | 1.093                    |                                  |                                  |
| DDX27             | 0.896                                                                | 0.976                    | 1.225                    |                                  | +                                |
| AKAP8L            | 0.896                                                                | 0.994                    | 1.254                    |                                  |                                  |
| LMNA              | 0.895                                                                | 0.889                    | 1.111                    |                                  | +                                |
| NHP2L1            | 0.894                                                                | 0.811                    | 1.025                    |                                  |                                  |
| ATP6V0D1          | 0.893                                                                | 0.892                    | 1.118                    |                                  | +                                |
| RTN4              | 0.893                                                                | 0.655                    | 0.884                    | +                                |                                  |
| ITGA5             | 0.891                                                                | 0.875                    | 1.103                    |                                  |                                  |
| TARDBP            | 0.891                                                                | 0.870                    | 1.097                    |                                  |                                  |
| UTRN              | 0.891                                                                | 0.874                    | 1.102                    |                                  |                                  |
| SGCD              | 0.890                                                                | 0.858                    | 1.084                    |                                  |                                  |
| MAPK3             | 0.890                                                                | 0.935                    | 1.183                    |                                  |                                  |
| TMEM165           | 0.890                                                                | 0.718                    | 0.942                    | +                                |                                  |
| CD44              | 0.889                                                                | 0.939                    | 1.191                    |                                  | +                                |
| ZFR               | 0.889                                                                | 0.915                    | 1.159                    |                                  |                                  |
| SNTB2             | 0.888                                                                | 0.830                    | 1.056                    |                                  |                                  |
| ABCD3             | 0.888                                                                | 0.852                    | 1.082                    |                                  |                                  |
| PPAP2A            | 0.888                                                                | 0.914                    | 1.160                    |                                  |                                  |
| LRP1              | 0.888                                                                | 0.989                    | 1.271                    |                                  | +                                |
| PROSC             | 0.888                                                                | 0.778                    | 1.003                    |                                  |                                  |
| SUMO2;SUMO4;SUMO  | 0.887                                                                | 0.835                    | 1.065                    |                                  |                                  |

| Protein name  | Average fold change in chromatin abundance (SILAC ratio UV vs no UV) | Forward L(no UV) / H(UV) | Reverse L(UV) / H(no UV) | Forward Significance B (p ≤0.05) | Reverse Significance B (p ≤0.05) |
|---------------|----------------------------------------------------------------------|--------------------------|--------------------------|----------------------------------|----------------------------------|
| CAV2          | 0.886                                                                | 0.766                    | 0.994                    | +                                |                                  |
| CTNNA2        | 0.885                                                                | 0.982                    | 1.268                    |                                  | +                                |
| ATP1B3        | 0.885                                                                | 0.807                    | 1.040                    |                                  |                                  |
| PEAK1         | 0.884                                                                | 0.940                    | 1.206                    |                                  |                                  |
| RRS1          | 0.884                                                                | 0.883                    | 1.132                    |                                  |                                  |
| TRIP12        | 0.881                                                                | 0.951                    | 1.234                    |                                  |                                  |
| POLR2H        | 0.880                                                                | 0.901                    | 1.164                    |                                  |                                  |
| NUCB1         | 0.880                                                                | 0.867                    | 1.120                    |                                  |                                  |
| TCOF1         | 0.878                                                                | 0.820                    | 1.068                    |                                  |                                  |
| NOP16         | 0.877                                                                | 0.818                    | 1.067                    |                                  |                                  |
| MRTO4         | 0.875                                                                | 0.819                    | 1.073                    |                                  |                                  |
| MFI2          | 0.874                                                                | 0.717                    | 0.969                    | +                                |                                  |
| WDR43         | 0.874                                                                | 0.882                    | 1.155                    |                                  |                                  |
| RPF2          | 0.873                                                                | 0.890                    | 1.168                    |                                  | +                                |
| XRN2          | 0.873                                                                | 0.848                    | 1.113                    |                                  |                                  |
| HNRNPC        | 0.873                                                                | 0.887                    | 1.163                    |                                  | +                                |
| LSM6          | 0.873                                                                | 0.783                    | 1.039                    |                                  |                                  |
| CACYBP        | 0.872                                                                | 1.015                    | 1.371                    |                                  | +                                |
| MKI67IP       | 0.870                                                                | 0.882                    | 1.164                    |                                  |                                  |
| HNRNPM        | 0.870                                                                | 0.824                    | 1.091                    |                                  |                                  |
| MYBBP1A       | 0.870                                                                | 0.875                    | 1.157                    |                                  |                                  |
| MME           | 0.870                                                                | 0.886                    | 1.172                    |                                  | +                                |
| MMP14         | 0.870                                                                | 1.001                    | 1.356                    |                                  | +                                |
| SPARC         | 0.869                                                                | 0.854                    | 1.131                    |                                  |                                  |
| DDX50         | 0.869                                                                | 0.920                    | 1.223                    |                                  |                                  |
| TPR           | 0.869                                                                | 0.844                    | 1.119                    |                                  |                                  |
| DDX39B;DDX39A | 0.869                                                                | 0.847                    | 1.124                    |                                  | +                                |
| RPL7L1        | 0.867                                                                | 0.933                    | 1.247                    |                                  | +                                |
| MRE11A        | 0.867                                                                | 0.930                    | 1.244                    |                                  | +                                |
| PES1          | 0.866                                                                | 0.918                    | 1.228                    |                                  | +                                |
| PPAP2B        | 0.866                                                                | 0.997                    | 1.361                    |                                  | +                                |
| SDPR          | 0.864                                                                | 0.929                    | 1.251                    |                                  | +                                |
| ALCAM         | 0.864                                                                | 0.894                    | 1.199                    |                                  | +                                |
| PTRF          | 0.863                                                                | 0.857                    | 1.150                    |                                  | +                                |
| RSL1D1        | 0.863                                                                | 0.824                    | 1.108                    |                                  |                                  |
| SART3         | 0.863                                                                | 0.754                    | 1.030                    | +                                |                                  |
| GOLIM4        | 0.860                                                                | 0.963                    | 1.322                    |                                  | +                                |
| CAV1          | 0.859                                                                | 0.836                    | 1.135                    |                                  | +                                |
| GAR1          | 0.857                                                                | 0.826                    | 1.126                    |                                  |                                  |
| PRRX2         | 0.857                                                                | 0.761                    | 1.050                    |                                  |                                  |
| GLG1          | 0.856                                                                | 1.002                    | 1.406                    |                                  | +                                |
| PPIL3         | 0.855                                                                | 0.771                    | 1.064                    |                                  |                                  |
| PRKCDBP       | 0.855                                                                | 0.863                    | 1.182                    |                                  | +                                |
| LAS1L         | 0.854                                                                | 0.796                    | 1.096                    |                                  |                                  |
| TECR          | 0.854                                                                | 1.074                    | 1.579                    |                                  | +                                |
| ELMSAN1       | 0.854                                                                | 0.857                    | 1.176                    |                                  |                                  |

| Protein name | Average fold change in chromatin abundance (SILAC ratio UV vs no UV) | Forward L(no UV) / H(UV) | Reverse L(UV) / H(no UV) | Forward Significance B (p ≤0.05) | Reverse Significance B (p ≤0.05) |
|--------------|----------------------------------------------------------------------|--------------------------|--------------------------|----------------------------------|----------------------------------|
| NOP2         | 0.851                                                                | 0.810                    | 1.121                    |                                  |                                  |
| MT-ND5       | 0.848                                                                | 0.745                    | 1.053                    |                                  |                                  |
| DDX24        | 0.847                                                                | 0.951                    | 1.344                    |                                  | +                                |
| LSM2         | 0.847                                                                | 0.779                    | 1.094                    |                                  |                                  |
| HNRNPH2      | 0.846                                                                | 0.796                    | 1.117                    |                                  |                                  |
| WDR74        | 0.846                                                                | 0.838                    | 1.172                    |                                  |                                  |
| RALY         | 0.846                                                                | 0.832                    | 1.164                    |                                  | +                                |
| KIAA0020     | 0.845                                                                | 0.865                    | 1.212                    |                                  |                                  |
| RAD50        | 0.843                                                                | 0.852                    | 1.199                    |                                  |                                  |
| SGCB         | 0.841                                                                | 0.773                    | 1.100                    | +                                |                                  |
| PRKDC        | 0.839                                                                | 0.819                    | 1.164                    | +                                |                                  |
| KIAA1967     | 0.835                                                                | 0.739                    | 1.073                    | +                                |                                  |
| BRX1         | 0.835                                                                | 0.753                    | 1.091                    | +                                |                                  |
| CHTOP        | 0.833                                                                | 0.829                    | 1.195                    |                                  | +                                |
| KIRREL       | 0.833                                                                | 0.909                    | 1.322                    |                                  | +                                |
| POLR2E       | 0.832                                                                | 0.824                    | 1.191                    |                                  |                                  |
| TNS1         | 0.831                                                                | 0.856                    | 1.239                    |                                  |                                  |
| NIP7         | 0.831                                                                | 0.794                    | 1.152                    |                                  |                                  |
| RBM28        | 0.830                                                                | 0.943                    | 1.396                    |                                  | +                                |
| SLC12A2      | 0.828                                                                | 0.834                    | 1.215                    |                                  |                                  |
| TMEM119      | 0.826                                                                | 0.933                    | 1.392                    |                                  | +                                |
| DNAH7        | 0.824                                                                | 1.326                    | 3.107                    | +                                | +                                |
| KRR1         | 0.822                                                                | 0.788                    | 1.169                    |                                  |                                  |
| TRIM28       | 0.819                                                                | 0.823                    | 1.227                    |                                  | +                                |
| SNRPD2       | 0.819                                                                | 0.787                    | 1.176                    |                                  | +                                |
| SNRPN;SNRPB  | 0.816                                                                | 0.831                    | 1.249                    |                                  | +                                |
| MATR3        | 0.813                                                                | 0.793                    | 1.200                    | +                                | +                                |
| EBNA1BP2     | 0.812                                                                | 0.794                    | 1.206                    |                                  | +                                |
| DDX18        | 0.811                                                                | 0.830                    | 1.262                    |                                  | +                                |
| EIF4A3       | 0.806                                                                | 0.852                    | 1.315                    |                                  | +                                |
| MLF2         | 0.805                                                                | 0.830                    | 1.282                    |                                  | +                                |
| RECK         | 0.802                                                                | 0.829                    | 1.291                    |                                  | +                                |
| POLR2B       | 0.799                                                                | 0.803                    | 1.256                    |                                  | +                                |
| ENPP1        | 0.796                                                                | 0.841                    | 1.332                    |                                  | +                                |
| SNRPE        | 0.796                                                                | 0.785                    | 1.240                    |                                  | +                                |
| SUGP2        | 0.789                                                                | 0.886                    | 1.447                    |                                  | +                                |
| SF3B1        | 0.786                                                                | 0.822                    | 1.333                    |                                  | +                                |
| SNRPD1       | 0.786                                                                | 0.768                    | 1.245                    | +                                | +                                |
| MAGOHB;MAGOH | 0.786                                                                | 0.722                    | 1.177                    | +                                | +                                |
| SMARCC2      | 0.783                                                                | 0.889                    | 1.477                    |                                  | +                                |
| CDC5L        | 0.782                                                                | 0.785                    | 1.282                    |                                  | +                                |
| PRPF19       | 0.782                                                                | 0.673                    | 1.123                    | +                                |                                  |
| KM-PA-2;BOP1 | 0.779                                                                | 0.642                    | 1.093                    | +                                |                                  |
| BCAS2        | 0.778                                                                | 0.765                    | 1.263                    |                                  |                                  |
| GJA1         | 0.777                                                                | 0.905                    | 1.542                    |                                  | +                                |
| RBM8A        | 0.775                                                                | 0.784                    | 1.305                    |                                  | +                                |

| Protein name | Average fold change in chromatin abundance (SILAC ratio UV vs no UV) | Forward L(no UV) / H(UV) | Reverse L(UV) / H(no UV) | Forward Significance B (p ≤0.05) | Reverse Significance B (p ≤0.05) |
|--------------|----------------------------------------------------------------------|--------------------------|--------------------------|----------------------------------|----------------------------------|
| PRPF6        | 0.771                                                                | 0.873                    | 1.494                    |                                  | +                                |
| SNRPD3       | 0.770                                                                | 0.788                    | 1.328                    |                                  | +                                |
| DDX56        | 0.758                                                                | 0.855                    | 1.515                    |                                  | +                                |
| SNW1         | 0.751                                                                | 0.802                    | 1.428                    |                                  | +                                |
| POLR2A       | 0.748                                                                | 0.867                    | 1.592                    |                                  | +                                |
| FN1          | 0.746                                                                | 0.826                    | 1.502                    |                                  | +                                |
| SF3B2        | 0.744                                                                | 0.715                    | 1.292                    | +                                | +                                |
| PPIL1        | 0.741                                                                | 0.633                    | 1.178                    | +                                |                                  |
| SNRNP40      | 0.731                                                                | 0.726                    | 1.360                    | +                                | +                                |
| SNRPA1       | 0.724                                                                | 0.681                    | 1.304                    | +                                | +                                |
| SF3A1        | 0.718                                                                | 0.765                    | 1.489                    |                                  | +                                |
| SNRPF        | 0.711                                                                | 0.513                    | 1.100                    | +                                |                                  |
| SNRNP200     | 0.709                                                                | 0.771                    | 1.547                    |                                  | +                                |
| XPC          | 0.705                                                                | 0.782                    | 1.591                    | +                                | +                                |
| EFTUD2       | 0.704                                                                | 0.641                    | 1.302                    | +                                | +                                |
| PRPF8        | 0.697                                                                | 0.780                    | 1.626                    |                                  | +                                |
| USP5         | 0.692                                                                | 0.893                    | 2.036                    |                                  | +                                |
| SNRPB2       | 0.687                                                                | 0.740                    | 1.576                    | +                                | +                                |
| SF3B5        | 0.643                                                                | 0.558                    | 1.374                    | +                                | +                                |
| TTN          | 0.642                                                                | 0.395                    | 1.124                    | +                                |                                  |
| BUD31        | 0.642                                                                | 0.694                    | 1.694                    | +                                | +                                |
| CPSF6        | 0.639                                                                | 0.960                    | 3.146                    |                                  |                                  |

Chromatin was isolated from mock-treated or UV irradiated HDFs (20 J/m<sup>2</sup>, 1hr post-irradiation) that were grown in media containing light [<sup>12</sup>C<sup>6</sup>]-lysine and [<sup>12</sup>C<sup>6</sup>,<sup>14</sup>N<sup>4</sup>]-arginine or heavy [<sup>13</sup>C<sup>6</sup>]-lysine and [<sup>13</sup>C<sup>6</sup>,<sup>15</sup>N<sup>4</sup>]-arginine. Nanoflow liquid chromatography tandem mass spectrometry (LC-MS/MS) and data analysis was performed as described in the Methods. In the forward SILAC experiment, cells grown in Light media (L) were mock-treated and cells grown in Heavy media (H) were UV-irradiated. Conversely, in the reverse experiment the mock-treated cells were those metabolically labeled with heavy amino acids. Ratio Significance B<sup>17</sup> was calculated by estimating the variance of the distribution of all protein ratios, taking into account the dependency of the distribution on the summed protein intensity. Proteins

**SI Table 2: UV-triggered and ATM-dependent alternative splicing events**

**SKIPPED EXONS**

| Gene ID         | exon Start<br>(0 base) | exon End  | chr.(x) | no UV vs UV<br>p Value | no UV vs UV<br>Inc.Level Dif. | UV vs ATMi+UV<br>Inc.Level Dif. |
|-----------------|------------------------|-----------|---------|------------------------|-------------------------------|---------------------------------|
| <i>ABCA1</i>    | 107566906              | 107567001 | chr9    | 0.032                  | 0.16                          | -0.16                           |
| <i>ACAD10</i>   | 112167609              | 112167760 | chr12   | 0.019                  | 0.17                          | -0.13                           |
| <i>ACLY</i>     | 40052872               | 40052902  | chr17   | 0.009                  | 0.14                          | -0.16                           |
| <i>ACTN1</i>    | 69345174               | 69345240  | chr14   | 0.016                  | 0.14                          | -0.15                           |
| <i>AFTPH</i>    | 64778576               | 64780543  | chr2    | 0.003                  | 0.25                          | -0.25                           |
| <i>AGAP1</i>    | 236626200              | 236626288 | chr2    | 0.043                  | 0.13                          | -0.13                           |
| <i>AGFG1</i>    | 228384663              | 228384779 | chr2    | 0.000                  | 0.11                          | -0.11                           |
| <i>AGO1</i>     | 36372535               | 36372720  | chr1    | 0.002                  | 0.19                          | -0.22                           |
| <i>AKAP10</i>   | 19835117               | 19835291  | chr17   | 0.020                  | 0.15                          | -0.19                           |
| <i>ALS2CR8</i>  | 203839056              | 203839219 | chr2    | 0.022                  | 0.45                          | -0.40                           |
| <i>ANAPC1</i>   | 112631189              | 112631241 | chr2    | 0.002                  | 0.13                          | -0.13                           |
| <i>ANAPC10</i>  | 146002811              | 146002902 | chr4    | 0.012                  | 0.15                          | -0.15                           |
| <i>ANKRD17</i>  | 73956383               | 73958017  | chr4    | 0.010                  | 0.11                          | -0.11                           |
| <i>ANKRD28</i>  | 15793256               | 15793327  | chr3    | 0.012                  | 0.12                          | -0.17                           |
| <i>AP4M1</i>    | 99700297               | 99700404  | chr7    | 0.017                  | 0.18                          | -0.11                           |
| <i>ARFGEF2</i>  | 47591302               | 47591411  | chr20   | 0.015                  | 0.14                          | -0.17                           |
| <i>ARHGAP12</i> | 32106715               | 32106814  | chr10   | 0.009                  | 0.21                          | -0.16                           |
| <i>ARHGEF11</i> | 156908209              | 156908305 | chr1    | 0.000                  | 0.39                          | -0.21                           |
| <i>ARID1A</i>   | 27088642               | 27088810  | chr1    | 0.000                  | 0.20                          | -0.20                           |
| <i>ARIH1</i>    | 72837160               | 72837305  | chr15   | 0.000                  | 0.11                          | -0.11                           |
| <i>ARV1</i>     | 231125855              | 231126009 | chr1    | 0.001                  | 0.27                          | -0.28                           |
| <i>ASPM</i>     | 197069560              | 197074315 | chr1    | 0.003                  | 0.51                          | -0.20                           |
| <i>ATF7</i>     | 53910798               | 53911138  | chr12   | 0.009                  | 0.24                          | -0.24                           |
| <i>ATG10</i>    | 81460217               | 81460356  | chr5    | 0.045                  | 0.28                          | -0.48                           |
| <i>ATG16L1</i>  | 234164747              | 234164841 | chr2    | 0.003                  | 0.20                          | -0.20                           |
| <i>ATP5S</i>    | 50790662               | 50790834  | chr14   | 0.017                  | 0.13                          | -0.13                           |
| <i>ATXN7</i>    | 63976413               | 63976535  | chr3    | 0.019                  | 0.10                          | -0.10                           |
| <i>BAG4</i>     | 38065029               | 38065284  | chr8    | 0.043                  | 0.20                          | -0.20                           |
| <i>BFAR</i>     | 14742244               | 14742449  | chr16   | 0.000                  | 0.11                          | -0.12                           |
| <i>BLZF1</i>    | 169351299              | 169351519 | chr1    | 0.000                  | 0.25                          | -0.25                           |
| <i>BOC</i>      | 112991915              | 112992188 | chr3    | 0.008                  | 0.19                          | -0.14                           |
| <i>BPNT1</i>    | 220236098              | 220236296 | chr1    | 0.007                  | 0.11                          | -0.12                           |
| <i>BRAP</i>     | 112098403              | 112098479 | chr12   | 0.016                  | 0.22                          | -0.22                           |
| <i>BRAP</i>     | 112103442              | 112103591 | chr12   | 0.015                  | 0.10                          | -0.10                           |
| <i>C12orf52</i> | 113623989              | 113624121 | chr12   | 0.010                  | 0.10                          | -0.10                           |
| <i>C2orf47</i>  | 200826503              | 200826651 | chr2    | 0.000                  | 0.60                          | -0.49                           |
| <i>C6orf136</i> | 30617334               | 30617736  | chr6    | 0.000                  | 0.77                          | -0.38                           |
| <i>C6orf136</i> | 30617334               | 30617736  | chr6    | 0.020                  | 0.37                          | -0.19                           |
| <i>CAD</i>      | 27448998               | 27449187  | chr2    | 0.021                  | 0.18                          | -0.11                           |
| <i>CAMLG</i>    | 134076752              | 134077213 | chr5    | 0.000                  | 0.37                          | -0.23                           |
| <i>CAMLG</i>    | 134076752              | 134077213 | chr5    | 0.000                  | 0.47                          | -0.22                           |
| <i>CAMTA2</i>   | 4884972                | 4885126   | chr17   | 0.030                  | 0.16                          | -0.16                           |
| <i>CBFA2T2</i>  | 32207322               | 32207412  | chr20   | 0.040                  | 0.29                          | -0.33                           |
| <i>CCDC58</i>   | 122087022              | 122087169 | chr3    | 0.001                  | 0.12                          | -0.12                           |

| Gene ID         | exon Start<br>(0 base) | exon End  | chr.(x) | no UV vs UV<br>p Value | no UV vs UV<br>Inc.Level Dif. | UV vs ATMi+UV<br>Inc.Level Dif. |
|-----------------|------------------------|-----------|---------|------------------------|-------------------------------|---------------------------------|
| <i>CDAN1</i>    | 43023817               | 43024023  | chr15   | 0.040                  | 0.16                          | -0.16                           |
| <i>CDK17</i>    | 96728496               | 96728643  | chr12   | 0.000                  | 0.12                          | -0.13                           |
| <i>CDK19</i>    | 111067328              | 111067404 | chr6    | 0.000                  | 0.29                          | -0.29                           |
| <i>CDK5RAP2</i> | 123169289              | 123169526 | chr9    | 0.014                  | 0.16                          | -0.18                           |
| <i>CDYL2</i>    | 80718434               | 80719026  | chr16   | 0.002                  | 0.24                          | -0.27                           |
| <i>CEP164</i>   | 117257918              | 117258128 | chr11   | 0.005                  | 0.13                          | -0.13                           |
| <i>CEP164</i>   | 117233119              | 117233254 | chr11   | 0.016                  | 0.12                          | -0.12                           |
| <i>CEP63</i>    | 134214137              | 134214206 | chr3    | 0.004                  | 0.28                          | -0.30                           |
| <i>CEP78</i>    | 80880774               | 80880822  | chr9    | 0.028                  | 0.43                          | -0.22                           |
| <i>CFLAR</i>    | 202005079              | 202005162 | chr2    | 0.003                  | 0.15                          | -0.15                           |
| <i>CHTOP</i>    | 153614721              | 153614905 | chr1    | 0.000                  | 0.42                          | -0.13                           |
| <i>CKAP2L</i>   | 113518289              | 113518341 | chr2    | 0.039                  | 0.21                          | -0.16                           |
| <i>CMC1</i>     | 28304781               | 28304871  | chr3    | 0.028                  | 0.11                          | -0.22                           |
| <i>CNTNAP3B</i> | 43844143               | 43844315  | chr9    | 0.035                  | 0.22                          | -0.20                           |
| <i>COL6A3</i>   | 238250707              | 238250804 | chr2    | 0.040                  | 0.13                          | -0.13                           |
| <i>CPT1C</i>    | 50195077               | 50195146  | chr19   | 0.003                  | 0.36                          | -0.18                           |
| <i>CROCCP3</i>  | 16802893               | 16802999  | chr1    | 0.016                  | 0.23                          | -0.26                           |
| <i>CSRP2BP</i>  | 18143020               | 18143589  | chr20   | 0.003                  | 0.25                          | -0.25                           |
| <i>CSTF3</i>    | 33112077               | 33112273  | chr11   | 0.006                  | 0.13                          | -0.13                           |
| <i>CUL2</i>     | 35318415               | 35318568  | chr10   | 0.003                  | 0.16                          | -0.16                           |
| <i>CYP20A1</i>  | 204111477              | 204111644 | chr2    | 0.004                  | 0.56                          | -0.39                           |
| <i>CYTH1</i>    | 76688498               | 76688575  | chr17   | 0.041                  | 0.24                          | -0.24                           |
| <i>DAG1</i>     | 49508397               | 49508482  | chr3    | 0.042                  | 0.78                          | -0.29                           |
| <i>DCAF10</i>   | 37857237               | 37857348  | chr9    | 0.013                  | 0.23                          | -0.33                           |
| <i>DCAF5</i>    | 69542061               | 69542128  | chr14   | 0.002                  | 0.14                          | -0.14                           |
| <i>DCAF8</i>    | 160231074              | 160231148 | chr1    | 0.012                  | 0.11                          | -0.13                           |
| <i>DDX58</i>    | 32485172               | 32485277  | chr9    | 0.045                  | 0.11                          | -0.11                           |
| <i>DDX6</i>     | 118635916              | 118636063 | chr11   | 0.000                  | 0.22                          | -0.13                           |
| <i>DENND4B</i>  | 153915031              | 153915101 | chr1    | 0.014                  | 0.23                          | -0.31                           |
| <i>DET1</i>     | 89070829               | 89071017  | chr15   | 0.027                  | 0.30                          | -0.20                           |
| <i>DHX35</i>    | 37653872               | 37654002  | chr20   | 0.012                  | 0.36                          | -0.36                           |
| <i>DHX57</i>    | 39033700               | 39033835  | chr2    | 0.015                  | 0.11                          | -0.11                           |
| <i>DIABLO</i>   | 122702812              | 122702944 | chr12   | 0.000                  | 0.11                          | -0.10                           |
| <i>DLGAP5</i>   | 55615311               | 55615402  | chr14   | 0.046                  | 0.18                          | -0.27                           |
| <i>DNAJC16</i>  | 15888636               | 15888820  | chr1    | 0.003                  | 0.18                          | -0.18                           |
| <i>DNMT3A</i>   | 25459804               | 25459874  | chr2    | 0.013                  | 0.43                          | -0.43                           |
| <i>DPP8</i>     | 65746600               | 65746753  | chr15   | 0.039                  | 0.20                          | -0.37                           |
| <i>DRAM1</i>    | 102313886              | 102313979 | chr12   | 0.005                  | 0.16                          | -0.15                           |
| <i>DRAM1</i>    | 102313886              | 102313979 | chr12   | 0.007                  | 0.12                          | -0.12                           |
| <i>DSTYK</i>    | 205128674              | 205128807 | chr1    | 0.005                  | 0.18                          | -0.18                           |
| <i>DUS4L</i>    | 107211589              | 107211711 | chr7    | 0.002                  | 0.17                          | -0.17                           |
| <i>EHMT1</i>    | 140685299              | 140685422 | chr9    | 0.001                  | 0.13                          | -0.13                           |
| <i>EI24</i>     | 125452241              | 125452315 | chr11   | 0.000                  | 0.64                          | -0.31                           |
| <i>EI24</i>     | 125451106              | 125451218 | chr11   | 0.000                  | 0.21                          | -0.11                           |
| <i>ELK4</i>     | 205592803              | 205593019 | chr1    | 0.027                  | 0.13                          | -0.13                           |
| <i>EML4</i>     | 42531623               | 42531691  | chr2    | 0.005                  | 0.11                          | -0.12                           |
| <i>ENTPD6</i>   | 25187157               | 25187226  | chr20   | 0.018                  | 0.23                          | -0.33                           |
| <i>ENTPD6</i>   | 25187711               | 25188033  | chr20   | 0.015                  | 0.15                          | -0.24                           |

| Gene ID             | exon Start<br>(0 base) | exon End  | chr.(x) | no UV vs UV<br>p Value | no UV vs UV<br>Inc.Level Dif. | UV vs ATMi+UV<br>Inc.Level Dif. |
|---------------------|------------------------|-----------|---------|------------------------|-------------------------------|---------------------------------|
| <i>ERIS</i>         | 44818521               | 44818597  | chr1    | 0.029                  | 0.13                          | -0.11                           |
| <i>ESF1</i>         | 13753160               | 13753261  | chr20   | 0.024                  | 0.25                          | -0.25                           |
| <i>ETV4</i>         | 41622925               | 41623036  | chr17   | 0.020                  | 0.27                          | -0.17                           |
| <i>FAM102A</i>      | 130716083              | 130716204 | chr9    | 0.021                  | 0.16                          | -0.16                           |
| <i>FAM72D</i>       | 143906011              | 143906136 | chr1    | 0.015                  | 0.49                          | -0.56                           |
| <i>FAM86DP</i>      | 75478286               | 75478388  | chr3    | 0.008                  | 0.24                          | -0.57                           |
| <i>FBXO11</i>       | 48045917               | 48046003  | chr2    | 0.000                  | 0.11                          | -0.11                           |
| <i>FBXO27</i>       | 39521668               | 39521764  | chr19   | 0.039                  | 0.22                          | -0.22                           |
| <i>FBXO28</i>       | 224321775              | 224321914 | chr1    | 0.000                  | 0.14                          | -0.10                           |
| <i>FGF5</i>         | 81196062               | 81196166  | chr4    | 0.000                  | 0.19                          | -0.12                           |
| <i>FKBP15</i>       | 115973756              | 115973872 | chr9    | 0.037                  | 0.17                          | -0.23                           |
| <i>FUT10</i>        | 33246480               | 33247316  | chr8    | 0.045                  | 0.27                          | -0.33                           |
| <i>GABPA</i>        | 27117520               | 27117665  | chr21   | 0.013                  | 0.11                          | -0.12                           |
| <i>GMEB1</i>        | 29016615               | 29016698  | chr1    | 0.030                  | 0.19                          | -0.19                           |
| <i>GNB1L</i>        | 19808120               | 19808246  | chr22   | 0.023                  | 0.33                          | -0.33                           |
| <i>GOLT1B</i>       | 21661316               | 21661495  | chr12   | 0.000                  | 0.29                          | -0.11                           |
| <i>GON4L</i>        | 155722994              | 155723205 | chr1    | 0.000                  | 0.42                          | -0.18                           |
| <i>GOSR1</i>        | 28837897               | 28837927  | chr17   | 0.017                  | 0.11                          | -0.12                           |
| <i>GSE1</i>         | 85698620               | 85698734  | chr16   | 0.017                  | 0.13                          | -0.13                           |
| <i>HACL1</i>        | 15616483               | 15616589  | chr3    | 0.043                  | 0.22                          | -0.11                           |
| <i>HECA</i>         | 139487420              | 139488461 | chr6    | 0.034                  | 0.17                          | -0.17                           |
| <i>HERC4</i>        | 69749967               | 69750157  | chr10   | 0.000                  | 0.10                          | -0.10                           |
| <i>HNRNPA1L2</i>    | 53206556               | 53206629  | chr13   | 0.005                  | 0.29                          | -0.25                           |
| <i>HSCB</i>         | 29139869               | 29139966  | chr22   | 0.000                  | 0.32                          | -0.13                           |
| <i>HSF2</i>         | 122749047              | 122749101 | chr6    | 0.027                  | 0.25                          | -0.17                           |
| <i>HSPA14</i>       | 14890788               | 14890894  | chr10   | 0.034                  | 0.24                          | -0.24                           |
| <i>HSPA14</i>       | 14893217               | 14893322  | chr10   | 0.013                  | 0.13                          | -0.13                           |
| <i>IDE</i>          | 94239033               | 94239178  | chr10   | 0.005                  | 0.12                          | -0.13                           |
| <i>IFI44</i>        | 79126238               | 79126339  | chr1    | 0.010                  | 0.44                          | -0.23                           |
| <i>IGF2BP3</i>      | 23383336               | 23383472  | chr7    | 0.002                  | 0.23                          | -0.31                           |
| <i>ILF3</i>         | 10798021               | 10798384  | chr19   | 0.030                  | 0.25                          | -0.15                           |
| <i>IMMP1L</i>       | 31477806               | 31477933  | chr11   | 0.000                  | 0.29                          | -0.17                           |
| <i>IMMP1L</i>       | 31484718               | 31484852  | chr11   | 0.006                  | 0.16                          | -0.10                           |
| <i>INPP4B</i>       | 143114239              | 143114348 | chr4    | 0.000                  | 0.13                          | -0.13                           |
| <i>INPP5B</i>       | 38334172               | 38334286  | chr1    | 0.003                  | 0.13                          | -0.13                           |
| <i>JMY</i>          | 78608225               | 78608321  | chr5    | 0.001                  | 0.58                          | -0.59                           |
| <i>KIAA0430</i>     | 15718625               | 15718784  | chr16   | 0.000                  | 0.20                          | -0.20                           |
| <i>KIAA0753</i>     | 6515238                | 6515468   | chr17   | 0.005                  | 0.13                          | -0.14                           |
| <i>KIAA1432</i>     | 5753199                | 5753238   | chr9    | 0.002                  | 0.35                          | -0.35                           |
| <i>KLHDC4</i>       | 87764157               | 87764250  | chr16   | 0.009                  | 0.12                          | -0.11                           |
| <i>LARS2</i>        | 45565488               | 45565600  | chr3    | 0.030                  | 0.18                          | -0.18                           |
| <i>LDLR</i>         | 11215895               | 11216276  | chr19   | 0.005                  | 0.15                          | -0.13                           |
| <i>LEF1</i>         | 109002741              | 109002825 | chr4    | 0.003                  | 0.55                          | -0.53                           |
| <i>LOC100506054</i> | 3606993                | 3607319   | chr2    | 0.020                  | 0.25                          | -0.27                           |
| <i>LOC100506054</i> | 3607037                | 3607319   | chr2    | 0.004                  | 0.31                          | -0.17                           |
| <i>LPIN2</i>        | 2928588                | 2928658   | chr18   | 0.003                  | 0.11                          | -0.12                           |
| <i>LRRC23</i>       | 7019053                | 7019190   | chr12   | 0.042                  | 0.35                          | -0.55                           |
| <i>LRRC23</i>       | 7016478                | 7016609   | chr12   | 0.003                  | 0.11                          | -0.13                           |



| Gene ID        | exon Start<br>(0 base) | exon End  | chr.(x) | no UV vs UV<br>p Value | no UV vs UV<br>Inc.Level Dif. | UV vs ATMi+UV<br>Inc.Level Dif. |
|----------------|------------------------|-----------|---------|------------------------|-------------------------------|---------------------------------|
| <i>LSM1</i>    | 38027319               | 38027435  | chr8    | 0.000                  | 0.44                          | -0.23                           |
| <i>MADD</i>    | 47310518               | 47310578  | chr11   | 0.024                  | 0.27                          | -0.18                           |
| <i>MAP2K4</i>  | 11984672               | 11984847  | chr17   | 0.030                  | 0.14                          | -0.17                           |
| <i>MAP4K3</i>  | 39494329               | 39494388  | chr2    | 0.001                  | 0.27                          | -0.27                           |
| <i>MBD1</i>    | 47797838               | 47797910  | chr18   | 0.000                  | 0.41                          | -0.17                           |
| <i>MBNL1</i>   | 152150505              | 152150709 | chr3    | 0.007                  | 0.13                          | -0.14                           |
| <i>MED13</i>   | 60033040               | 60033199  | chr17   | 0.000                  | 0.41                          | -0.44                           |
| <i>MELK</i>    | 36583623               | 36583709  | chr9    | 0.007                  | 0.33                          | -0.19                           |
| <i>METTL16</i> | 2371054                | 2371170   | chr17   | 0.014                  | 0.33                          | -0.33                           |
| <i>METTL6</i>  | 2405497                | 2405625   | chr17   | 0.023                  | 0.22                          | -0.25                           |
| <i>MINA</i>    | 97686005               | 97686476  | chr3    | 0.035                  | 0.16                          | -0.16                           |
| <i>MITF</i>    | 69988248               | 69988332  | chr3    | 0.026                  | 0.50                          | -0.50                           |
| <i>MLX</i>     | 40720487               | 40720577  | chr17   | 0.000                  | 0.36                          | -0.27                           |
| <i>MLXIP</i>   | 122616838              | 122616930 | chr12   | 0.010                  | 0.12                          | -0.14                           |
| <i>MPPE1</i>   | 11884877               | 11885042  | chr18   | 0.002                  | 0.25                          | -0.32                           |
| <i>MRPL22</i>  | 154330380              | 154330498 | chr5    | 0.004                  | 0.40                          | -0.26                           |
| <i>MRT04</i>   | 19583947               | 19584015  | chr1    | 0.000                  | 0.10                          | -0.10                           |
| <i>MTERFD1</i> | 97256146               | 97256308  | chr8    | 0.003                  | 0.13                          | -0.13                           |
| <i>MTMR12</i>  | 32271938               | 32272011  | chr5    | 0.007                  | 0.29                          | -0.30                           |
| <i>MTMR6</i>   | 25825786               | 25825913  | chr13   | 0.001                  | 0.13                          | -0.11                           |
| <i>MTOR</i>    | 11276204               | 11276291  | chr1    | 0.011                  | 0.12                          | -0.12                           |
| <i>MTR</i>     | 236995265              | 236995378 | chr1    | 0.001                  | 0.19                          | -0.14                           |
| <i>MYO10</i>   | 16762153               | 16762222  | chr5    | 0.000                  | 0.20                          | -0.17                           |
| <i>MZF1</i>    | 59081710               | 59081894  | chr19   | 0.017                  | 0.20                          | -0.19                           |
| <i>N4BP1</i>   | 48585296               | 48585393  | chr16   | 0.002                  | 0.19                          | -0.20                           |
| <i>NAPB</i>    | 23377708               | 23377825  | chr20   | 0.041                  | 0.67                          | -0.81                           |
| <i>NCAPD3</i>  | 134079038              | 134079100 | chr11   | 0.002                  | 0.20                          | -0.14                           |
| <i>NFYA</i>    | 41046767               | 41046903  | chr6    | 0.018                  | 0.11                          | -0.11                           |
| <i>NHLRC3</i>  | 39616241               | 39616442  | chr13   | 0.018                  | 0.30                          | -0.17                           |
| <i>NOX4</i>    | 89135493               | 89135710  | chr11   | 0.001                  | 0.14                          | -0.14                           |
| <i>NUFIP1</i>  | 45533515               | 45533709  | chr13   | 0.019                  | 0.11                          | -0.11                           |
| <i>NUP98</i>   | 3723692                | 3724122   | chr11   | 0.010                  | 0.11                          | -0.11                           |
| <i>ORC4</i>    | 148733470              | 148733544 | chr2    | 0.028                  | 0.11                          | -0.13                           |
| <i>OSBPL11</i> | 125271024              | 125271523 | chr3    | 0.010                  | 0.29                          | -0.29                           |
| <i>OSBPL2</i>  | 60835072               | 60835181  | chr20   | 0.028                  | 0.24                          | -0.24                           |
| <i>OSBPL2</i>  | 60835036               | 60835181  | chr20   | 0.007                  | 0.12                          | -0.12                           |
| <i>OSBPL5</i>  | 3124468                | 3124550   | chr11   | 0.031                  | 0.11                          | -0.11                           |
| <i>PAPD4</i>   | 78952780               | 78952824  | chr5    | 0.007                  | 0.11                          | -0.12                           |
| <i>PAPD4</i>   | 78944884               | 78945013  | chr5    | 0.040                  | 0.11                          | -0.11                           |
| <i>PAQR6</i>   | 156214932              | 156215029 | chr1    | 0.019                  | 0.20                          | -0.25                           |
| <i>PATL1</i>   | 59423428               | 59423518  | chr11   | 0.013                  | 0.17                          | -0.18                           |
| <i>PCGF6</i>   | 105093681              | 105093709 | chr10   | 0.005                  | 0.16                          | -0.16                           |
| <i>PCNX</i>    | 71455283               | 71455416  | chr14   | 0.008                  | 0.16                          | -0.12                           |
| <i>PDE8A</i>   | 85634274               | 85634412  | chr15   | 0.003                  | 0.25                          | -0.20                           |
| <i>PDHX</i>    | 34952950               | 34953031  | chr11   | 0.001                  | 0.11                          | -0.11                           |
| <i>PEX14</i>   | 10596269               | 10596354  | chr1    | 0.014                  | 0.26                          | -0.26                           |
| <i>PEX3</i>    | 143780221              | 143780353 | chr6    | 0.014                  | 0.14                          | -0.14                           |
| <i>PEX5</i>    | 7354836                | 7354947   | chr12   | 0.000                  | 0.32                          | -0.18                           |

| Gene ID        | exon Start<br>(0 base) | exon End  | chr.(x) | no UV vs UV<br>p Value | no UV vs UV<br>Inc.Level Dif. | UV vs ATMi+UV<br>Inc.Level Dif. |
|----------------|------------------------|-----------|---------|------------------------|-------------------------------|---------------------------------|
| <i>PHACTR4</i> | 28817462               | 28817524  | chr1    | 0.006                  | 0.21                          | -0.21                           |
| <i>PHF20L1</i> | 133826881              | 133827134 | chr8    | 0.019                  | 0.26                          | -0.26                           |
| <i>PHF20L1</i> | 133851631              | 133851827 | chr8    | 0.030                  | 0.13                          | -0.13                           |
| <i>PHF7</i>    | 52456237               | 52456354  | chr3    | 0.046                  | 0.50                          | -0.17                           |
| <i>PHF8</i>    | 54020033               | 54020336  | chrX    | 0.032                  | 0.42                          | -0.31                           |
| <i>PHKA1</i>   | 71840574               | 71840751  | chrX    | 0.041                  | 0.19                          | -0.11                           |
| <i>PKN2</i>    | 89270073               | 89270217  | chr1    | 0.010                  | 0.16                          | -0.16                           |
| <i>PLAGL1</i>  | 144269121              | 144269597 | chr6    | 0.001                  | 0.32                          | -0.17                           |
| <i>POLB</i>    | 42196529               | 42196587  | chr8    | 0.000                  | 0.47                          | -0.30                           |
| <i>POLM</i>    | 44113996               | 44114129  | chr7    | 0.032                  | 0.25                          | -0.25                           |
| <i>POLR2D</i>  | 128610498              | 128610679 | chr2    | 0.000                  | 0.18                          | -0.12                           |
| <i>POLR3E</i>  | 22343443               | 22343506  | chr16   | 0.001                  | 0.14                          | -0.12                           |
| <i>POLR3E</i>  | 22343380               | 22343506  | chr16   | 0.001                  | 0.14                          | -0.11                           |
| <i>POLR3F</i>  | 18449587               | 18449705  | chr20   | 0.006                  | 0.25                          | -0.25                           |
| <i>PPHLN1</i>  | 42745686               | 42745851  | chr12   | 0.009                  | 0.15                          | -0.17                           |
| <i>PPOX</i>    | 161139695              | 161139814 | chr1    | 0.013                  | 0.17                          | -0.17                           |
| <i>PPP6R3</i>  | 68337215               | 68337365  | chr11   | 0.003                  | 0.12                          | -0.12                           |
| <i>PRKCA</i>   | 64492318               | 64492401  | chr17   | 0.031                  | 0.14                          | -0.14                           |
| <i>PROSER1</i> | 39608267               | 39608333  | chr13   | 0.007                  | 0.33                          | -0.12                           |
| <i>PTCD2</i>   | 71617998               | 71618091  | chr5    | 0.016                  | 0.17                          | -0.18                           |
| <i>PTPN13</i>  | 87690921               | 87691136  | chr4    | 0.006                  | 0.13                          | -0.13                           |
| <i>PUM1</i>    | 31452908               | 31453010  | chr1    | 0.006                  | 0.24                          | -0.25                           |
| <i>PUM1</i>    | 31418192               | 31418330  | chr1    | 0.000                  | 0.20                          | -0.20                           |
| <i>RAB8B</i>   | 63541843               | 63541904  | chr15   | 0.024                  | 0.22                          | -0.22                           |
| <i>RABEPK</i>  | 127982817              | 127982979 | chr9    | 0.001                  | 0.20                          | -0.11                           |
| <i>RBM27</i>   | 145638011              | 145638156 | chr5    | 0.011                  | 0.20                          | -0.20                           |
| <i>RBM28</i>   | 127965870              | 127965944 | chr7    | 0.034                  | 0.11                          | -0.11                           |
| <i>RBM5</i>    | 50129475               | 50129641  | chr3    | 0.000                  | 0.13                          | -0.11                           |
| <i>RBMS2</i>   | 56982715               | 56982802  | chr12   | 0.029                  | 0.13                          | -0.16                           |
| <i>RECQL4</i>  | 145741147              | 145741274 | chr8    | 0.047                  | 0.28                          | -0.22                           |
| <i>REV1</i>    | 100065797              | 100065966 | chr2    | 0.028                  | 0.20                          | -0.22                           |
| <i>RFWD3</i>   | 74685817               | 74686020  | chr16   | 0.012                  | 0.19                          | -0.22                           |
| <i>RGS20</i>   | 54852135               | 54852284  | chr8    | 0.000                  | 0.37                          | -0.33                           |
| <i>RHPN1</i>   | 144458694              | 144458823 | chr8    | 0.020                  | 0.31                          | -0.27                           |
| <i>RIC8B</i>   | 107245227              | 107245372 | chr12   | 0.044                  | 0.13                          | -0.13                           |
| <i>RNF115</i>  | 145683574              | 145683647 | chr1    | 0.012                  | 0.15                          | -0.15                           |
| <i>ROCK2</i>   | 11362208               | 11362300  | chr2    | 0.002                  | 0.14                          | -0.14                           |
| <i>RPAIN</i>   | 5331390                | 5331531   | chr17   | 0.000                  | 0.41                          | -0.14                           |
| <i>RPP14</i>   | 58296035               | 58296133  | chr3    | 0.000                  | 0.47                          | -0.78                           |
| <i>RPP14</i>   | 58296035               | 58296133  | chr3    | 0.000                  | 0.33                          | -0.20                           |
| <i>RPRD2</i>   | 150390071              | 150390201 | chr1    | 0.001                  | 0.29                          | -0.29                           |
| <i>RPS6KB1</i> | 57991995               | 57992064  | chr17   | 0.004                  | 0.15                          | -0.15                           |
| <i>RXRB</i>    | 33166945               | 33167193  | chr6    | 0.000                  | 0.21                          | -0.15                           |
| <i>SAMD4A</i>  | 55215532               | 55215642  | chr14   | 0.039                  | 0.19                          | -0.19                           |
| <i>SARS</i>    | 109774252              | 109774408 | chr1    | 0.000                  | 0.17                          | -0.15                           |
| <i>SBDSP1</i>  | 72301271               | 72301393  | chr7    | 0.000                  | 0.24                          | -0.17                           |
| <i>SBNO1</i>   | 123832575              | 123832680 | chr12   | 0.004                  | 0.39                          | -0.42                           |
| <i>SBNO1</i>   | 123832575              | 123832680 | chr12   | 0.003                  | 0.24                          | -0.25                           |

| Gene ID          | exon Start<br>(0 base) | exon End  | chr.(x) | no UV vs UV<br>p Value | no UV vs UV<br>Inc.Level Dif. | UV vs ATMi+UV<br>Inc.Level Dif. |
|------------------|------------------------|-----------|---------|------------------------|-------------------------------|---------------------------------|
| <i>SCFD1</i>     | 31097414               | 31097485  | chr14   | 0.006                  | 0.24                          | -0.11                           |
| <i>SETDB1</i>    | 150922933              | 150923566 | chr1    | 0.020                  | 0.21                          | -0.22                           |
| <i>SETDB1</i>    | 150935449              | 150935615 | chr1    | 0.002                  | 0.15                          | -0.16                           |
| <i>SHROOM3</i>   | 77651956               | 77652088  | chr4    | 0.028                  | 0.19                          | -0.20                           |
| <i>SIN3A</i>     | 75681992               | 75682162  | chr15   | 0.000                  | 0.11                          | -0.11                           |
| <i>SIPA1L3</i>   | 38633212               | 38633350  | chr19   | 0.000                  | 0.16                          | -0.11                           |
| <i>SIRT3</i>     | 233342                 | 233534    | chr11   | 0.001                  | 0.20                          | -0.24                           |
| <i>SLC12A6</i>   | 34549842               | 34549989  | chr15   | 0.007                  | 0.25                          | -0.25                           |
| <i>SLC18B1</i>   | 133093270              | 133093345 | chr6    | 0.048                  | 0.17                          | -0.17                           |
| <i>SLC25A12</i>  | 172644080              | 172644171 | chr2    | 0.001                  | 0.31                          | -0.31                           |
| <i>SLC25A43</i>  | 118544152              | 118544325 | chrX    | 0.030                  | 0.22                          | -0.22                           |
| <i>SLC33A1</i>   | 155560220              | 155560408 | chr3    | 0.026                  | 0.14                          | -0.14                           |
| <i>SLC33A1</i>   | 155551645              | 155551830 | chr3    | 0.013                  | 0.21                          | -0.12                           |
| <i>SLC33A1</i>   | 155551645              | 155551830 | chr3    | 0.007                  | 0.10                          | -0.10                           |
| <i>SLC38A2</i>   | 46764294               | 46764410  | chr12   | 0.000                  | 0.50                          | -0.14                           |
| <i>SLC7A6</i>    | 68324298               | 68324443  | chr16   | 0.001                  | 0.43                          | -0.28                           |
| <i>SLTM</i>      | 59182479               | 59182660  | chr15   | 0.018                  | 0.11                          | -0.14                           |
| <i>SNX17</i>     | 27595906               | 27595980  | chr2    | 0.025                  | 0.33                          | -0.11                           |
| <i>SPAG9</i>     | 49053223               | 49053262  | chr17   | 0.018                  | 0.11                          | -0.24                           |
| <i>SPECC1</i>    | 20107645               | 20109225  | chr17   | 0.000                  | 0.33                          | -0.15                           |
| <i>SPEN</i>      | 16245898               | 16246012  | chr1    | 0.020                  | 0.20                          | -0.20                           |
| <i>SPOP</i>      | 47685235               | 47685291  | chr17   | 0.001                  | 0.11                          | -0.11                           |
| <i>ST5</i>       | 8772167                | 8772272   | chr11   | 0.021                  | 0.40                          | -0.40                           |
| <i>STK19</i>     | 31947190               | 31947330  | chr6    | 0.012                  | 0.14                          | -0.14                           |
| <i>STX18</i>     | 4426890                | 4426949   | chr4    | 0.002                  | 0.21                          | -0.21                           |
| <i>STX3</i>      | 59564755               | 59564869  | chr11   | 0.000                  | 0.67                          | -0.58                           |
| <i>STYXL1</i>    | 75651168               | 75651310  | chr7    | 0.002                  | 0.19                          | -0.16                           |
| <i>STYXL1</i>    | 75643059               | 75643205  | chr7    | 0.001                  | 0.17                          | -0.16                           |
| <i>SYNRG</i>     | 35930735               | 35930984  | chr17   | 0.014                  | 0.19                          | -0.20                           |
| <i>SYNRG</i>     | 35896080               | 35896229  | chr17   | 0.005                  | 0.12                          | -0.13                           |
| <i>SYNRG</i>     | 35928892               | 35929026  | chr17   | 0.006                  | 0.10                          | -0.10                           |
| <i>TAB3</i>      | 30861082               | 30861166  | chrX    | 0.044                  | 0.13                          | -0.13                           |
| <i>TAOK3</i>     | 118639100              | 118639268 | chr12   | 0.041                  | 0.11                          | -0.11                           |
| <i>TATDN1</i>    | 125534391              | 125534441 | chr8    | 0.011                  | 0.13                          | -0.10                           |
| <i>TATDN3</i>    | 212985568              | 212985670 | chr1    | 0.041                  | 0.19                          | -0.22                           |
| <i>TATDN3</i>    | 212985589              | 212985670 | chr1    | 0.043                  | 0.12                          | -0.15                           |
| <i>TBC1D15</i>   | 72274248               | 72274387  | chr12   | 0.010                  | 0.10                          | -0.11                           |
| <i>TENM4</i>     | 78859754               | 78859851  | chr11   | 0.023                  | 0.25                          | -0.19                           |
| <i>TEP1</i>      | 20849711               | 20849845  | chr14   | 0.004                  | 0.46                          | -0.66                           |
| <i>TFPT</i>      | 54617821               | 54618080  | chr19   | 0.024                  | 0.14                          | -0.14                           |
| <i>THAP5</i>     | 108206273              | 108206466 | chr7    | 0.043                  | 0.16                          | -0.18                           |
| <i>THAP9-AS1</i> | 83819141               | 83819215  | chr4    | 0.000                  | 0.45                          | -0.29                           |
| <i>THUMPD2</i>   | 39982434               | 39982549  | chr2    | 0.036                  | 0.20                          | -0.22                           |
| <i>TJP1</i>      | 30012561               | 30012912  | chr15   | 0.001                  | 0.12                          | -0.12                           |
| <i>TLK1</i>      | 171974248              | 171974367 | chr2    | 0.006                  | 0.13                          | -0.13                           |
| <i>TMEM131</i>   | 98460607               | 98460724  | chr2    | 0.017                  | 0.15                          | -0.17                           |
| <i>TMEM25</i>    | 118404134              | 118404266 | chr11   | 0.021                  | 0.30                          | -0.19                           |
| <i>TMEM53</i>    | 45125845               | 45125967  | chr1    | 0.013                  | 0.32                          | -0.35                           |

| Gene ID        | exon Start<br>(0 base) | exon End  | chr.(x) | no UV vs UV<br>p Value | no UV vs UV<br>Inc.Level Dif. | UV vs ATMi+UV<br>Inc.Level Dif. |
|----------------|------------------------|-----------|---------|------------------------|-------------------------------|---------------------------------|
| <i>TOX2</i>    | 42693416               | 42693497  | chr20   | 0.009                  | 0.44                          | -0.29                           |
| <i>TRAPPC8</i> | 29419274               | 29419420  | chr18   | 0.001                  | 0.18                          | -0.20                           |
| <i>TRIM16</i>  | 15535822               | 15535988  | chr17   | 0.005                  | 0.13                          | -0.13                           |
| <i>TRIM56</i>  | 100730286              | 100730449 | chr7    | 0.003                  | 0.12                          | -0.12                           |
| <i>TRPT1</i>   | 63993257               | 63993341  | chr11   | 0.000                  | 0.31                          | -0.14                           |
| <i>TSTD2</i>   | 100367008              | 100367147 | chr9    | 0.022                  | 0.10                          | -0.10                           |
| <i>TTBK2</i>   | 43102811               | 43102937  | chr15   | 0.018                  | 0.22                          | -0.15                           |
| <i>TTC27</i>   | 32961760               | 32961883  | chr2    | 0.043                  | 0.13                          | -0.13                           |
| <i>UBAP1</i>   | 34234213               | 34234338  | chr9    | 0.009                  | 0.15                          | -0.19                           |
| <i>UBAP1</i>   | 34220905               | 34220946  | chr9    | 0.007                  | 0.17                          | -0.10                           |
| <i>UBE3B</i>   | 109961782              | 109961920 | chr12   | 0.012                  | 0.11                          | -0.11                           |
| <i>UBE4B</i>   | 10190557               | 10190674  | chr1    | 0.002                  | 0.13                          | -0.13                           |
| <i>UBN1</i>    | 4902879                | 4903167   | chr16   | 0.004                  | 0.13                          | -0.11                           |
| <i>UFSP2</i>   | 186343638              | 186343717 | chr4    | 0.016                  | 0.16                          | -0.13                           |
| <i>USP42</i>   | 6185778                | 6185879   | chr7    | 0.042                  | 0.33                          | -0.33                           |
| <i>USP54</i>   | 75279554               | 75279750  | chr10   | 0.004                  | 0.17                          | -0.17                           |
| <i>UVSSA</i>   | 1345502                | 1345623   | chr4    | 0.019                  | 0.13                          | -0.13                           |
| <i>VPS33B</i>  | 91549601               | 91549675  | chr15   | 0.041                  | 0.23                          | -0.23                           |
| <i>VPS4B</i>   | 61066474               | 61066556  | chr18   | 0.001                  | 0.14                          | -0.14                           |
| <i>VPS53</i>   | 613772                 | 613853    | chr17   | 0.019                  | 0.29                          | -0.29                           |
| <i>VPS54</i>   | 64208779               | 64209021  | chr2    | 0.042                  | 0.38                          | -0.41                           |
| <i>WDR20</i>   | 102661274              | 102661457 | chr14   | 0.001                  | 0.21                          | -0.25                           |
| <i>WDR37</i>   | 1123846                | 1123943   | chr10   | 0.022                  | 0.34                          | -0.40                           |
| <i>WHSC1L1</i> | 38156961               | 38157108  | chr8    | 0.016                  | 0.44                          | -0.23                           |
| <i>XPO4</i>    | 21381595               | 21381773  | chr13   | 0.018                  | 0.36                          | -0.26                           |
| <i>YIPF1</i>   | 54354579               | 54354659  | chr1    | 0.004                  | 0.13                          | -0.15                           |
| <i>ZC3H3</i>   | 144620172              | 144621490 | chr8    | 0.018                  | 0.12                          | -0.12                           |
| <i>ZC3H4</i>   | 47572348               | 47572600  | chr19   | 0.006                  | 0.16                          | -0.18                           |
| <i>ZCCHC8</i>  | 122975008              | 122975114 | chr12   | 0.015                  | 0.22                          | -0.22                           |
| <i>ZFAND1</i>  | 82629483               | 82629523  | chr8    | 0.014                  | 0.26                          | -0.20                           |
| <i>ZFAND6</i>  | 80390757               | 80390920  | chr15   | 0.004                  | 0.14                          | -0.12                           |
| <i>ZFYVE19</i> | 41104896               | 41105100  | chr15   | 0.036                  | 0.15                          | -0.14                           |
| <i>ZMYM5</i>   | 20425494               | 20425588  | chr13   | 0.030                  | 0.40                          | -0.36                           |
| <i>ZNF263</i>  | 3338453                | 3338570   | chr16   | 0.000                  | 0.51                          | -0.11                           |
| <i>ZNF271</i>  | 32870973               | 32871196  | chr18   | 0.035                  | 0.12                          | -0.14                           |
| <i>ZNF410</i>  | 74358729               | 74358911  | chr14   | 0.000                  | 0.26                          | -0.23                           |
| <i>ZZEF1</i>   | 3928212                | 3928412   | chr17   | 0.026                  | 0.13                          | -0.14                           |

#### INCLUDED EXONS

| Gene ID        | exon Start<br>(0 base) | exon End | chr.(x) | no UV vs UV<br>p Value | no UV vs UV<br>Inc.Level Dif. | UV vs ATMi+UV<br>Inc.Level Dif. |
|----------------|------------------------|----------|---------|------------------------|-------------------------------|---------------------------------|
| <i>ABI1</i>    | 27060003               | 27060018 | chr10   | 0.032                  | 0.23                          | -0.28                           |
| <i>ACIN1</i>   | 23559190               | 23559310 | chr14   | 0.027                  | 0.14                          | -0.13                           |
| <i>AFMID</i>   | 76201520               | 76201599 | chr17   | 0.047                  | 0.65                          | -0.38                           |
| <i>ALAS1</i>   | 52232687               | 52232864 | chr3    | 0.000                  | 0.13                          | -0.11                           |
| <i>ANKRD11</i> | 89358088               | 89358185 | chr16   | 0.000                  | 0.41                          | -0.12                           |
| <i>APTX</i>    | 32988080               | 32988127 | chr9    | 0.026                  | 0.14                          | -0.16                           |

| Gene ID         | exon Start<br>(0 base) | exon End  | chr.(x) | no UV vs UV<br>p Value | no UV vs UV<br>Inc.Level Dif. | UV vs ATMi+UV<br>Inc.Level Dif. |
|-----------------|------------------------|-----------|---------|------------------------|-------------------------------|---------------------------------|
| <i>ASNS</i>     | 97501030               | 97501308  | chr7    | 0.000                  | 0.31                          | -0.19                           |
| <i>ATP5SL</i>   | 41939176               | 41939339  | chr19   | 0.004                  | 0.15                          | -0.17                           |
| <i>ATRIP</i>    | 48491898               | 48491981  | chr3    | 0.017                  | 0.25                          | -0.24                           |
| <i>AURKB</i>    | 8113494                | 8113567   | chr17   | 0.004                  | 0.36                          | -0.19                           |
| <i>BRD8</i>     | 137495243              | 137495288 | chr5    | 0.000                  | 0.25                          | -0.16                           |
| <i>BTN3A2</i>   | 26368410               | 26368495  | chr6    | 0.007                  | 0.30                          | -0.16                           |
| <i>BTN3A2</i>   | 26368405               | 26368495  | chr6    | 0.002                  | 0.26                          | -0.11                           |
| <i>C12orf23</i> | 107350859              | 107350927 | chr12   | 0.000                  | 0.48                          | -0.29                           |
| <i>C17orf80</i> | 71238382               | 71238490  | chr17   | 0.000                  | 0.44                          | -0.15                           |
| <i>C7orf10</i>  | 40314111               | 40314255  | chr7    | 0.043                  | 0.28                          | -0.17                           |
| <i>CACFD1</i>   | 136333461              | 136333586 | chr9    | 0.032                  | 0.14                          | -0.17                           |
| <i>CCSER2</i>   | 86259630               | 86259715  | chr10   | 0.022                  | 0.42                          | -0.47                           |
| <i>CCT6P1</i>   | 65219513               | 65219648  | chr7    | 0.013                  | 0.37                          | -0.17                           |
| <i>CD44</i>     | 35226058               | 35226187  | chr11   | 0.004                  | 0.22                          | -0.12                           |
| <i>CDC47</i>    | 174223982              | 174224219 | chr2    | 0.042                  | 0.31                          | -0.22                           |
| <i>CDK10</i>    | 89755659               | 89755732  | chr16   | 0.046                  | 0.13                          | -0.30                           |
| <i>CREB1</i>    | 208425842              | 208425884 | chr2    | 0.006                  | 0.35                          | -0.18                           |
| <i>CREBZF</i>   | 85372680               | 85372793  | chr11   | 0.001                  | 0.58                          | -0.29                           |
| <i>CSNK1G3</i>  | 122930732              | 122930828 | chr5    | 0.010                  | 0.34                          | -0.34                           |
| <i>CYLD</i>     | 50778640               | 50778777  | chr16   | 0.017                  | 0.19                          | -0.21                           |
| <i>DMD</i>      | 31144758               | 31144790  | chrX    | 0.023                  | 0.23                          | -0.17                           |
| <i>DTYMK</i>    | 242619643              | 242619734 | chr2    | 0.000                  | 0.16                          | -0.16                           |
| <i>ECT2</i>     | 172469939              | 172470262 | chr3    | 0.006                  | 0.38                          | -0.56                           |
| <i>EIF4G1</i>   | 184033550              | 184033644 | chr3    | 0.002                  | 0.54                          | -0.20                           |
| <i>EPN2</i>     | 19188932               | 19189103  | chr17   | 0.044                  | 0.13                          | -0.17                           |
| <i>ERP29</i>    | 112457559              | 112457698 | chr12   | 0.000                  | 0.22                          | -0.21                           |
| <i>EXOSC9</i>   | 122737298              | 122737349 | chr4    | 0.000                  | 0.70                          | -0.21                           |
| <i>FAM86B1</i>  | 12043860               | 12044126  | chr8    | 0.025                  | 0.27                          | -0.39                           |
| <i>FAM86DP</i>  | 75476925               | 75477059  | chr3    | 0.000                  | 0.41                          | -0.46                           |
| <i>FDPS</i>     | 155279579              | 155279756 | chr1    | 0.003                  | 0.13                          | -0.11                           |
| <i>FGFR1OP2</i> | 27113447               | 27113561  | chr12   | 0.000                  | 0.17                          | -0.18                           |
| <i>FHL2</i>     | 106013103              | 106013154 | chr2    | 0.000                  | 0.19                          | -0.17                           |
| <i>FLNB</i>     | 58127584               | 58127623  | chr3    | 0.048                  | 0.11                          | -0.11                           |
| <i>G3BP2</i>    | 76579166               | 76579265  | chr4    | 0.000                  | 0.21                          | -0.12                           |
| <i>GALNS</i>    | 88909113               | 88909237  | chr16   | 0.005                  | 0.17                          | -0.14                           |
| <i>GEMIN7</i>   | 45583164               | 45583287  | chr19   | 0.000                  | 0.31                          | -0.23                           |
| <i>GGA3</i>     | 73244920               | 73245089  | chr17   | 0.025                  | 0.37                          | -0.14                           |
| <i>GPR56</i>    | 57675498               | 57675620  | chr16   | 0.000                  | 0.28                          | -0.23                           |
| <i>GPR56</i>    | 57675502               | 57675620  | chr16   | 0.001                  | 0.24                          | -0.16                           |
| <i>GTF3C2</i>   | 27573180               | 27573256  | chr2    | 0.011                  | 0.35                          | -0.49                           |
| <i>HAUS7</i>    | 152720334              | 152720511 | chrX    | 0.011                  | 0.25                          | -0.11                           |
| <i>HDAC7</i>    | 48189688               | 48189799  | chr12   | 0.003                  | 0.22                          | -0.23                           |
| <i>HERC4</i>    | 69718869               | 69718893  | chr10   | 0.001                  | 0.30                          | -0.23                           |
| <i>HINFP</i>    | 118994277              | 118994394 | chr11   | 0.024                  | 0.36                          | -0.34                           |
| <i>HIRIP3</i>   | 30005226               | 30006164  | chr16   | 0.046                  | 0.12                          | -0.13                           |
| <i>HNRPDL</i>   | 83346715               | 83346820  | chr4    | 0.000                  | 0.33                          | -0.21                           |
| <i>IKBIP</i>    | 99028073               | 99028191  | chr12   | 0.002                  | 0.17                          | -0.10                           |
| <i>IL1RAP</i>   | 190273918              | 190274005 | chr3    | 0.045                  | 0.30                          | -0.12                           |

| Gene ID          | exon Start<br>(0 base) | exon End  | chr.(x) | no UV vs UV<br>p Value | no UV vs UV<br>Inc.Level Dif. | UV vs ATMi+UV<br>Inc.Level Dif. |
|------------------|------------------------|-----------|---------|------------------------|-------------------------------|---------------------------------|
| <i>KIAA0391</i>  | 35595940               | 35595988  | chr14   | 0.039                  | 0.20                          | -0.23                           |
| <i>KXD1</i>      | 18671229               | 18671360  | chr19   | 0.000                  | 0.13                          | -0.12                           |
| <i>LARP4</i>     | 50806187               | 50806236  | chr12   | 0.032                  | 0.20                          | -0.23                           |
| <i>LETMD1</i>    | 51449926               | 51450028  | chr12   | 0.008                  | 0.13                          | -0.16                           |
| <i>LGMN</i>      | 93207406               | 93207524  | chr14   | 0.009                  | 0.15                          | -0.12                           |
| <i>LINC00674</i> | 66102562               | 66102694  | chr17   | 0.000                  | 0.34                          | -0.11                           |
| <i>LOC388796</i> | 37054582               | 37054700  | chr20   | 0.000                  | 0.84                          | -0.43                           |
| <i>LOC388796</i> | 37054582               | 37054700  | chr20   | 0.000                  | 0.27                          | -0.23                           |
| <i>LOC401074</i> | 75725118               | 75725279  | chr3    | 0.000                  | 0.53                          | -0.23                           |
| <i>LOXL3</i>     | 74763835               | 74764055  | chr2    | 0.019                  | 0.61                          | -0.42                           |
| <i>LRR1</i>      | 50070269               | 50070336  | chr14   | 0.000                  | 0.63                          | -0.29                           |
| <i>LRRC42</i>    | 54413460               | 54413494  | chr1    | 0.020                  | 0.27                          | -0.34                           |
| <i>LRRCC1</i>    | 86021829               | 86022035  | chr8    | 0.041                  | 0.49                          | -0.19                           |
| <i>LYRM1</i>     | 20913807               | 20914039  | chr16   | 0.001                  | 0.29                          | -0.28                           |
| <i>MAP4K4</i>    | 102487955              | 102488147 | chr2    | 0.045                  | 0.12                          | -0.18                           |
| <i>MAST4</i>     | 66445216               | 66445417  | chr5    | 0.013                  | 0.60                          | -0.67                           |
| <i>MBD1</i>      | 47799703               | 47799841  | chr18   | 0.007                  | 0.11                          | -0.11                           |
| <i>MECOM</i>     | 168825713              | 168825740 | chr3    | 0.008                  | 0.71                          | -0.85                           |
| <i>METTL15</i>   | 28349641               | 28349712  | chr11   | 0.010                  | 0.45                          | -0.27                           |
| <i>MFF</i>       | 228207460              | 228207535 | chr2    | 0.000                  | 0.26                          | -0.18                           |
| <i>MORF4L2</i>   | 102939608              | 102939657 | chrX    | 0.000                  | 0.35                          | -0.22                           |
| <i>MPDZ</i>      | 13143464               | 13143563  | chr9    | 0.001                  | 0.46                          | -0.36                           |
| <i>MRPL10</i>    | 45906504               | 45906602  | chr17   | 0.000                  | 0.16                          | -0.14                           |
| <i>MTO1</i>      | 74190015               | 74190090  | chr6    | 0.008                  | 0.26                          | -0.11                           |
| <i>MUM1</i>      | 1358586                | 1358699   | chr19   | 0.005                  | 0.21                          | -0.16                           |
| <i>MYO1B</i>     | 192267357              | 192267444 | chr2    | 0.021                  | 0.22                          | -0.17                           |
| <i>NABP1</i>     | 192547217              | 192547321 | chr2    | 0.009                  | 0.51                          | -0.15                           |
| <i>NF2</i>       | 30079008               | 30079068  | chr22   | 0.029                  | 0.29                          | -0.28                           |
| <i>NF2</i>       | 30079008               | 30079053  | chr22   | 0.001                  | 0.29                          | -0.26                           |
| <i>NFAT5</i>     | 69602397               | 69602451  | chr16   | 0.030                  | 0.29                          | -0.27                           |
| <i>NIPA2</i>     | 23026021               | 23026119  | chr15   | 0.038                  | 0.12                          | -0.13                           |
| <i>NMRK1</i>     | 77693241               | 77693498  | chr9    | 0.016                  | 0.32                          | -0.33                           |
| <i>NOSIP</i>     | 50080015               | 50080134  | chr19   | 0.000                  | 0.27                          | -0.21                           |
| <i>NT5C2</i>     | 104940987              | 104941085 | chr10   | 0.000                  | 0.22                          | -0.16                           |
| <i>NUBP2</i>     | 1836757                | 1836956   | chr16   | 0.000                  | 0.17                          | -0.14                           |
| <i>PAX8</i>      | 113992970              | 113993080 | chr2    | 0.033                  | 0.23                          | -0.19                           |
| <i>PAX8</i>      | 113992970              | 113993159 | chr2    | 0.039                  | 0.17                          | -0.13                           |
| <i>PHACTR2</i>   | 144081537              | 144081777 | chr6    | 0.000                  | 0.69                          | -0.25                           |
| <i>PI4KB</i>     | 151298647              | 151298849 | chr1    | 0.001                  | 0.28                          | -0.12                           |
| <i>PIP5K1C</i>   | 3633434                | 3633518   | chr19   | 0.014                  | 0.57                          | -0.51                           |
| <i>PLEKHA5</i>   | 19423121               | 19423139  | chr12   | 0.024                  | 0.20                          | -0.20                           |
| <i>PLXNB2</i>    | 50733147               | 50733207  | chr22   | 0.028                  | 0.16                          | -0.19                           |
| <i>PPP1R9A</i>   | 94832976               | 94833042  | chr7    | 0.023                  | 0.59                          | -0.21                           |
| <i>PPP3CC</i>    | 22396981               | 22397011  | chr8    | 0.018                  | 0.28                          | -0.34                           |
| <i>PQLC1</i>     | 77679183               | 77679400  | chr18   | 0.049                  | 0.19                          | -0.14                           |
| <i>PRMT7</i>     | 68355328               | 68355365  | chr16   | 0.003                  | 0.18                          | -0.28                           |
| <i>PRR16</i>     | 119816863              | 119816988 | chr5    | 0.000                  | 0.29                          | -0.20                           |
| <i>PSMG4</i>     | 3264442                | 3264559   | chr6    | 0.016                  | 0.18                          | -0.17                           |

| Gene ID           | exon Start<br>(0 base) | exon End  | chr.(x) | no UV vs UV<br>p Value | no UV vs UV<br>Inc.Level Dif. | UV vs ATMi+UV<br>Inc.Level Dif. |
|-------------------|------------------------|-----------|---------|------------------------|-------------------------------|---------------------------------|
| <i>PTPN2</i>      | 12819212               | 12819281  | chr18   | 0.006                  | 0.18                          | -0.11                           |
| <i>PTPRA</i>      | 2955860                | 2955887   | chr20   | 0.015                  | 0.14                          | -0.19                           |
| <i>R3HCC1L</i>    | 99971063               | 99971105  | chr10   | 0.010                  | 0.17                          | -0.17                           |
| <i>R3HDM1</i>     | 136373721              | 136373763 | chr2    | 0.041                  | 0.32                          | -0.13                           |
| <i>RCC1</i>       | 28857034               | 28857127  | chr1    | 0.009                  | 0.21                          | -0.14                           |
| <i>REPIN1</i>     | 150067848              | 150067973 | chr7    | 0.003                  | 0.47                          | -0.13                           |
| <i>RHOT1</i>      | 30538134               | 30538257  | chr17   | 0.031                  | 0.31                          | -0.11                           |
| <i>RPAIN</i>      | 5329555                | 5329619   | chr17   | 0.002                  | 0.16                          | -0.12                           |
| <i>RTCA</i>       | 100733055              | 100733094 | chr1    | 0.014                  | 0.20                          | -0.16                           |
| <i>RTN2</i>       | 45996417               | 45996636  | chr19   | 0.010                  | 0.17                          | -0.23                           |
| <i>RWDD1</i>      | 116895220              | 116895334 | chr6    | 0.000                  | 0.18                          | -0.12                           |
| <i>SDHAP1</i>     | 195711362              | 195711608 | chr3    | 0.002                  | 0.38                          | -0.37                           |
| <i>SLC35E2</i>    | 1675689                | 1676107   | chr1    | 0.040                  | 0.38                          | -0.20                           |
| <i>SMTN</i>       | 31489769               | 31489862  | chr22   | 0.000                  | 0.12                          | -0.10                           |
| <i>SNHG16</i>     | 74555026               | 74555125  | chr17   | 0.000                  | 0.26                          | -0.18                           |
| <i>SOCS4</i>      | 55498580               | 55498709  | chr14   | 0.000                  | 0.42                          | -0.13                           |
| <i>SPECC1L</i>    | 24672667               | 24672771  | chr22   | 0.002                  | 0.29                          | -0.31                           |
| <i>SPIRE1</i>     | 12485957               | 12485999  | chr18   | 0.002                  | 0.15                          | -0.13                           |
| <i>SRSF3</i>      | 36567597               | 36568053  | chr6    | 0.000                  | 0.56                          | -0.13                           |
| <i>ST6GALNAC4</i> | 130678686              | 130678773 | chr9    | 0.004                  | 0.23                          | -0.18                           |
| <i>STK40</i>      | 36833448               | 36833685  | chr1    | 0.003                  | 0.29                          | -0.35                           |
| <i>TACC2</i>      | 123903086              | 123903221 | chr10   | 0.023                  | 0.57                          | -0.71                           |
| <i>TCF7L2</i>     | 114849158              | 114849299 | chr10   | 0.011                  | 0.15                          | -0.20                           |
| <i>TGFB2</i>      | 218536675              | 218536759 | chr1    | 0.002                  | 0.12                          | -0.14                           |
| <i>TGFBR2</i>     | 30664690               | 30664765  | chr3    | 0.040                  | 0.17                          | -0.10                           |
| <i>TPM1</i>       | 63356262               | 63356341  | chr15   | 0.011                  | 0.10                          | -0.12                           |
| <i>TRIM33</i>     | 114940561              | 114940612 | chr1    | 0.000                  | 0.32                          | -0.15                           |
| <i>UBP1</i>       | 33450181               | 33450289  | chr3    | 0.000                  | 0.36                          | -0.13                           |
| <i>UPP1</i>       | 48142893               | 48143008  | chr7    | 0.012                  | 0.14                          | -0.26                           |
| <i>USP10</i>      | 84738345               | 84738466  | chr16   | 0.001                  | 0.33                          | -0.34                           |
| <i>USP3</i>       | 63821212               | 63821365  | chr15   | 0.002                  | 0.62                          | -0.17                           |
| <i>USP33</i>      | 78211105               | 78211284  | chr1    | 0.001                  | 0.24                          | -0.34                           |
| <i>WASF1</i>      | 110499800              | 110499945 | chr6    | 0.015                  | 0.57                          | -0.18                           |
| <i>ZFAND5</i>     | 74978385               | 74978522  | chr9    | 0.000                  | 0.34                          | -0.17                           |
| <i>ZNF195</i>     | 3381949                | 3382018   | chr11   | 0.021                  | 0.38                          | -0.38                           |
| <i>ZNF23</i>      | 71489974               | 71490024  | chr16   | 0.030                  | 0.64                          | -1.00                           |
| <i>ZNF260</i>     | 37008931               | 37009045  | chr19   | 0.001                  | 0.29                          | -0.24                           |
| <i>ZNF419</i>     | 58003480               | 58003579  | chr19   | 0.000                  | 0.23                          | -0.13                           |
| <i>ZNF419</i>     | 58001514               | 58001553  | chr19   | 0.001                  | 0.22                          | -0.12                           |
| <i>ZNF706</i>     | 102214560              | 102214675 | chr8    | 0.000                  | 0.22                          | -0.11                           |
| <i>ZNF83</i>      | 53119970               | 53120068  | chr19   | 0.002                  | 0.19                          | -0.15                           |
| <i>ZNF83</i>      | 53119970               | 53120094  | chr19   | 0.002                  | 0.19                          | -0.15                           |

## MUTUALLY EXCLUSIVE EXONS

| Gene ID         | 1st ExonStart<br>(0 base) | 1st ExonEnd | 2nd ExonStart<br>(0 base) | 2nd ExonEnd | chr.(x) | no UV vs UV<br>p Value | no UV vs UV<br>Inc.Level Dif. | UV vs ATMi+UV<br>Inc.Level Dif. |
|-----------------|---------------------------|-------------|---------------------------|-------------|---------|------------------------|-------------------------------|---------------------------------|
| <i>CAMLG</i>    | 134076752                 | 134077213   | 134079676                 | 134079742   | chr5    | 0.000                  | 0.21                          | -0.11                           |
| <i>CREM</i>     | 35477127                  | 35477316    | 35490378                  | 35490414    | chr10   | 0.016                  | 0.61                          | -0.12                           |
| <i>FAM86DP</i>  | 75476925                  | 75477059    | 75478286                  | 75478388    | chr3    | 0.000                  | 0.36                          | -0.52                           |
| <i>FUT8</i>     | 65922338                  | 65922436    | 66028054                  | 66028484    | chr14   | 0.045                  | 0.13                          | -0.13                           |
| <i>LETMD1</i>   | 51442816                  | 51442968    | 51449926                  | 51450028    | chr12   | 0.003                  | 0.11                          | -0.14                           |
| <i>MARK3</i>    | 103964838                 | 103964865   | 103966492                 | 103966537   | chr14   | 0.003                  | 0.24                          | -0.15                           |
| <i>MICAL2</i>   | 12270730                  | 12270793    | 12277189                  | 12277297    | chr11   | 0.018                  | 0.30                          | -0.18                           |
| <i>MYO10</i>    | 16783443                  | 16783578    | 16794754                  | 16794942    | chr5    | 0.023                  | 0.18                          | -0.24                           |
| <i>POLB</i>     | 42206533                  | 42206608    | 42207524                  | 42207583    | chr8    | 0.009                  | 0.22                          | -0.35                           |
| <i>PPOX</i>     | 161139695                 | 161139814   | 161140198                 | 161140309   | chr1    | 0.015                  | 0.19                          | -0.13                           |
| <i>RAB34</i>    | 27043920                  | 27044012    | 27044230                  | 27044443    | chr17   | 0.000                  | 0.31                          | -0.17                           |
| <i>RAB34</i>    | 27043920                  | 27044012    | 27044230                  | 27044309    | chr17   | 0.003                  | 0.14                          | -0.17                           |
| <i>RAP1GDS1</i> | 99325627                  | 99325753    | 99337895                  | 99338039    | chr4    | 0.034                  | 0.11                          | -0.14                           |
| <i>TOM1L1</i>   | 53016284                  | 53016381    | 53024621                  | 53024673    | chr17   | 0.026                  | 0.13                          | -0.10                           |
| <i>USP20</i>    | 132625464                 | 132625578   | 132627581                 | 132627660   | chr9    | 0.002                  | 0.24                          | -0.12                           |

## RETAINED INTRONS (RI)

| Gene ID          | RI-Start<br>(0 base) | RI-End    | chr.(x) | no UV vs UV<br>p Value | no UV vs UV<br>Inc.Level Dif. | UV vs ATMi+UV<br>Inc.Level Dif. |
|------------------|----------------------|-----------|---------|------------------------|-------------------------------|---------------------------------|
| <i>ARMCX6</i>    | 100870750            | 100871661 | chrX    | 0.000                  | 0.30                          | -0.14                           |
| <i>ATPIF1</i>    | 28562963             | 28564271  | chr1    | 0.000                  | 0.32                          | -0.15                           |
| <i>C1QTNF6</i>   | 37576907             | 37578191  | chr22   | 0.000                  | 0.60                          | -0.29                           |
| <i>CMTM4</i>     | 66651261             | 66655964  | chr16   | 0.008                  | 0.13                          | -0.11                           |
| <i>DHRS4-AS1</i> | 24423242             | 24423333  | chr14   | 0.043                  | 0.47                          | -0.40                           |
| <i>GLYCTK</i>    | 52326585             | 52327061  | chr3    | 0.033                  | 0.26                          | -0.12                           |
| <i>HES4</i>      | 935167               | 935245    | chr1    | 0.000                  | 0.21                          | -0.17                           |
| <i>KDM2B</i>     | 121867966            | 121868144 | chr12   | 0.002                  | 0.22                          | -0.16                           |
| <i>NFATC4</i>    | 24845760             | 24846843  | chr14   | 0.003                  | 0.14                          | -0.13                           |
| <i>NGRN</i>      | 90809108             | 90809519  | chr15   | 0.000                  | 0.10                          | -0.16                           |
| <i>PIGO</i>      | 35091288             | 35092539  | chr9    | 0.009                  | 0.23                          | -0.24                           |
| <i>QKI</i>       | 163984751            | 163985698 | chr6    | 0.000                  | 0.41                          | -0.54                           |
| <i>RAB43</i>     | 128840335            | 128840586 | chr3    | 0.038                  | 0.20                          | -0.23                           |
| <i>ARMCX6</i>    | 100870750            | 100871661 | chrX    | 0.000                  | 0.30                          | -0.14                           |
| <i>RASSF7</i>    | 563317               | 563557    | chr11   | 0.042                  | 0.28                          | -0.11                           |
| <i>SEC14L1</i>   | 75210101             | 75212630  | chr17   | 0.002                  | 0.24                          | -0.10                           |
| <i>SLC11A2</i>   | 51373841             | 51375421  | chr12   | 0.000                  | 0.43                          | -0.19                           |
| <i>SMOX</i>      | 4162970              | 4163129   | chr20   | 0.042                  | 0.13                          | -0.13                           |
| <i>TMEM138</i>   | 61131787             | 61131904  | chr11   | 0.000                  | 0.32                          | -0.21                           |
| <i>TULP3</i>     | 3048590              | 3049695   | chr12   | 0.000                  | 0.28                          | -0.21                           |
| <i>ZDHHC4</i>    | 6617129              | 6617220   | chr7    | 0.002                  | 0.37                          | -0.13                           |
| <i>ZNF248</i>    | 38120240             | 38121952  | chr10   | 0.033                  | 0.52                          | -0.48                           |



## ALTERNATIVE 5' SPLICE SITE

| Gene ID          | LongExonStart<br>(0 base) | LongExonEnd | ShortExonStart | ShortExonEnd | chr.(x) | no UV vs UV<br>p Value | no UV vs UV<br>Inc.Level Dif. | UV vs ATMi+UV<br>Inc.Level Dif. |
|------------------|---------------------------|-------------|----------------|--------------|---------|------------------------|-------------------------------|---------------------------------|
| <i>AMN1</i>      | 31881904                  | 31882108    | 31881924       | 31882108     | chr12   | 0.030                  | 0.27                          | -0.46                           |
| <i>APEX1</i>     | 20923289                  | 20923497    | 20923289       | 20923487     | chr14   | 0.000                  | 0.27                          | -0.13                           |
| <i>C14orf159</i> | 91580356                  | 91580872    | 91580356       | 91580627     | chr14   | 0.028                  | 0.22                          | -0.59                           |
| <i>C17orf58</i>  | 65989016                  | 65989351    | 65989159       | 65989351     | chr17   | 0.017                  | 0.17                          | -0.16                           |
| <i>C1D</i>       | 68290076                  | 68290159    | 68290089       | 68290159     | chr2    | 0.034                  | 0.17                          | -0.12                           |
| <i>ERC1</i>      | 1100403                   | 1100653     | 1100403        | 1100488      | chr12   | 0.043                  | 0.36                          | -0.55                           |
| <i>LOC81691</i>  | 20817766                  | 20818139    | 20817766       | 20818027     | chr16   | 0.038                  | 0.24                          | -0.20                           |
| <i>MCM8</i>      | 5931297                   | 5931723     | 5931297        | 5931669      | chr20   | 0.020                  | 0.34                          | -0.68                           |
| <i>MSTO1</i>     | 155583447                 | 155583557   | 155583447      | 155583524    | chr1    | 0.031                  | 0.55                          | -0.36                           |
| <i>NFATC4</i>    | 24845499                  | 24846084    | 24845499       | 24845760     | chr14   | 0.001                  | 0.21                          | -0.13                           |
| <i>OCIAD1</i>    | 48853822                  | 48854037    | 48853822       | 48853992     | chr4    | 0.014                  | 0.13                          | -0.12                           |
| <i>PGAP2</i>     | 3845499                   | 3845685     | 3845499        | 3845594      | chr11   | 0.000                  | 0.40                          | -0.13                           |
| <i>PGAP2</i>     | 3845499                   | 3845606     | 3845499        | 3845594      | chr11   | 0.017                  | 0.23                          | -0.13                           |
| <i>PGAP2</i>     | 3845499                   | 3845685     | 3845499        | 3845606      | chr11   | 0.007                  | 0.22                          | -0.10                           |
| <i>PPFIA1</i>    | 70184479                  | 70184559    | 70184479       | 70184540     | chr11   | 0.016                  | 0.32                          | -0.11                           |
| <i>PRDM10</i>    | 129781979                 | 129782120   | 129782018      | 129782120    | chr11   | 0.018                  | 0.46                          | -0.40                           |
| <i>STX16</i>     | 57226308                  | 57227194    | 57226308       | 57227143     | chr20   | 0.000                  | 0.24                          | -0.10                           |
| <i>TRIB2</i>     | 12856997                  | 12858703    | 12856997       | 12857136     | chr2    | 0.026                  | 0.16                          | -0.20                           |
| <i>ZC3H14</i>    | 89069171                  | 89069404    | 89069171       | 89069389     | chr14   | 0.035                  | 0.10                          | -0.15                           |
| <i>ZDHHC4</i>    | 6617064                   | 6617351     | 6617064        | 6617129      | chr7    | 0.048                  | 0.12                          | -0.11                           |

## ALTERNATIVE 3' SPLICE SITE

| Gene ID         | longExonStart<br>(0 base) | longExonEnd | ShortExonStart | ShortExonEnd | chr.(x) | no UV vs UV<br>p Value | no UV vs UV<br>Inc.Level Dif. | UV vs ATMi+UV<br>Inc.Level Dif. |
|-----------------|---------------------------|-------------|----------------|--------------|---------|------------------------|-------------------------------|---------------------------------|
| <i>ALKBH2</i>   | 109530311                 | 109530742   | 109530311      | 109530592    | chr12   | 0.002                  | 0.19                          | -0.24                           |
| <i>ARFIP2</i>   | 6501552                   | 6501693     | 6501552        | 6501653      | chr11   | 0.003                  | 0.12                          | -0.11                           |
| <i>BRD9</i>     | 886706                    | 886882      | 886706         | 886822       | chr5    | 0.000                  | 0.28                          | -0.14                           |
| <i>C19orf60</i> | 18700222                  | 18700493    | 18700288       | 18700493     | chr19   | 0.039                  | 0.21                          | -0.26                           |
| <i>CAPRIN2</i>  | 30867892                  | 30868078    | 30867892       | 30868015     | chr12   | 0.000                  | 0.19                          | -0.10                           |
| <i>CLINT1</i>   | 157216370                 | 157216575   | 157216370      | 157216521    | chr5    | 0.001                  | 0.21                          | -0.13                           |
| <i>DYRK1B</i>   | 40317311                  | 40317627    | 40317311       | 40317507     | chr19   | 0.023                  | 0.16                          | -0.24                           |
| <i>FAM213A</i>  | 82180221                  | 82180401    | 82180238       | 82180401     | chr10   | 0.010                  | 0.33                          | -0.17                           |
| <i>IFFO1</i>    | 6657833                   | 6658015     | 6657833        | 6657991      | chr12   | 0.046                  | 0.26                          | -0.31                           |
| <i>KANSL3</i>   | 97297048                  | 97297280    | 97297048       | 97297219     | chr2    | 0.014                  | 0.18                          | -0.12                           |
| <i>MLLT10</i>   | 22028958                  | 22029165    | 22029082       | 22029165     | chr10   | 0.045                  | 0.23                          | -0.34                           |
| <i>MLST8</i>    | 2256031                   | 2256215     | 2256061        | 2256215      | chr16   | 0.025                  | 0.33                          | -0.47                           |
| <i>MOK</i>      | 102698871                 | 102699045   | 102698871      | 102699008    | chr14   | 0.000                  | 0.24                          | -0.20                           |
| <i>MORF4L2</i>  | 102933426                 | 102933579   | 102933426      | 102933548    | chrX    | 0.005                  | 0.15                          | -0.12                           |
| <i>MPPE1</i>    | 11886711                  | 11886780    | 11886711       | 11886777     | chr18   | 0.021                  | 0.27                          | -0.13                           |
| <i>MRPS31P5</i> | 52744121                  | 52744234    | 52744121       | 52744191     | chr13   | 0.037                  | 0.34                          | -0.16                           |
| <i>MTERFD3</i>  | 107378892                 | 107379003   | 107378892      | 107378993    | chr12   | 0.013                  | 0.53                          | -0.92                           |
| <i>NFYC</i>     | 41236380                  | 41237275    | 41236383       | 41237275     | chr1    | 0.002                  | 0.26                          | -0.26                           |
| <i>PKMYT1</i>   | 3023138                   | 3023254     | 3023138        | 3023216      | chr16   | 0.000                  | 0.45                          | -0.14                           |
| <i>PMS2</i>     | 6045522                   | 6045662     | 6045522        | 6045657      | chr7    | 0.004                  | 0.28                          | -0.13                           |
| <i>YY1AP1</i>   | 155638417                 | 155638568   | 155638417      | 155638508    | chr1    | 0.001                  | 0.27                          | -0.12                           |

| Gene ID        | longExonStart<br>(0 base) | longExonEnd | ShortExonStart | ShortExonEnd | chr.(x) | no UV vs UV<br>p Value | no UV vs UV<br>Inc.Level Dif. | UV vs ATMi+UV<br>Inc.Level Dif. |
|----------------|---------------------------|-------------|----------------|--------------|---------|------------------------|-------------------------------|---------------------------------|
| <b>ZFAND5</b>  | 74975543                  | 74975703    | 74975543       | 74975700     | chr9    | 0.000                  | 0.19                          | -0.15                           |
| <b>ZFYVE27</b> | 99511132                  | 99511219    | 99511147       | 99511219     | chr10   | 0.006                  | 0.15                          | -0.15                           |
| <b>ZNF473</b>  | 50534148                  | 50534348    | 50534270       | 50534348     | chr19   | 0.000                  | 0.39                          | -0.20                           |

Quiescent RPE cells were mock treated or UV-irradiated with 20 J/m<sup>2</sup> in the presence or absence of an ATM inhibitor. Poly-adenylated RNA was isolated 6 hrs post-irradiation and paired-end RNA-Seq was performed and data analyzed as described in the Methods. Uniquely mapped reads were used for the identification of alternative splicing events using Multivariate Analysis of Transcript Splicing (MATS)<sup>45</sup>. Inclusion Level Difference (Incl.Level.Dif.) is the average (Inclusion Level in sample 1) - average (Inclusion Level in sample 2). Inclusion Levels for each sample were calculated by MATS from normalized counts of expressed sequence tags mapped uniquely to the exon inclusion or skipping exon-exon junctions. Events that were significantly changed by UV irradiation (untreated vs UV-irradiated) ( $p \leq 0.05$ ,  $n=2$ ) and changed in the opposite direction when cells were irradiated in the presence of the ATM inhibitor (UV irradiated vs ATM-treated and UV irradiated) with a difference above 10% (for both comparisons) were considered to be dependent on ATM activity.
